# Supplementary material for: Outcome-Specific Efficacy of Different Probiotic Strains and Mixtures in Irritable Bowel Syndrome: A Systematic Review and Network Meta-Analysis
Source: MDPI journal article supplement (doi:10.3390/nu15173856), 2023-09-04
Supplement: s1 [file s1]

## Supplementary Materials

### Supplement to:

Outcome-Specific Efficacy of Different Probiotic Strains and Mixtures in Irritable Bowel Syndrome: A Systematic Review and Network Meta-Analysis

### Appendix

|                                                                                                                                 |    |
|---------------------------------------------------------------------------------------------------------------------------------|----|
| Text S1. Supplements and alterations of the original protocol .....                                                             | 2  |
| Text S2. Search strategy .....                                                                                                  | 3  |
| Text S3. Data collection process .....                                                                                          | 5  |
| Text S4. References to RCTs included in this network meta-analysis.....                                                         | 6  |
| Figure S1. The distribution of effect modifiers .....                                                                           | 10 |
| Figure S2. Risk of bias 2 evaluations for each outcome .....                                                                    | 13 |
| Figure S3. Network plots .....                                                                                                  | 17 |
| Figure S4. Cumulative ranking curves for each outcome .....                                                                     | 22 |
| Figure S5. Predictive interval plots for each pair of interventions .....                                                       | 27 |
| Figure S6. Funnel plots for each outcome .....                                                                                  | 33 |
| Table S1. Characteristics of included randomized controlled trials (1) .....                                                    | 37 |
| Table S2. Characteristics of included randomized controlled trials (2) .....                                                    | 40 |
| Table S3. Critical results of pairwise meta-analysis .....                                                                      | 43 |
| Table S4. League table demonstrating the relative efficacy for each pair of comparison in the NMA .....                         | 49 |
| Table S5. The surface under the cumulative ranking curve (SUCRA) values .....                                                   | 55 |
| Table S6. Results of loop specific analysis, node-splitting method and design-by-treatment interaction inconsistency model..... | 60 |
| Table S7. GRADE-based assessment of the quality of evidence for each outcome .....                                              | 61 |
| Table S8. Alterations of gut microbiota abundance .....                                                                         | 65 |
| Table S9. The alteration of gut microbiota diversity before and after intervention .....                                        | 66 |

### **Text S1. Supplements and alterations of the original protocol.**

In order to make our NMA more comprehensive and rigorous, we have made the following additions and alterations based on the original protocol.

1. Literatures were searched from inception until June 1, 2023.
2. Outcomes regarding the change in the Hospital Anxiety and Depression Scale, bowel movement frequency (per week), Bristol stool form scale score were added to this NMA.
3. Data regarding the adverse events for each study were collected.

## Text S2. Search Strategy

### 1. Web of science

|    |                                                                                                                                                                                                                                 |
|----|---------------------------------------------------------------------------------------------------------------------------------------------------------------------------------------------------------------------------------|
| #1 | (TS=(irritable bowel syndrome)) OR TS=(IBS) and Preprint Citation Index (Exclude – Database)                                                                                                                                    |
| #2 | ((TS=(clinical trial)) OR TS=(clinical trials)) OR TS=(random*) OR TS=(random allocation) and Preprint Citation Index (Exclude – Database)                                                                                      |
| #3 | (((((TS=(Probiotic*)) OR TS=(Lactobacillus)) OR TS=(Saccharomyces)) OR TS=(Bacillus)) OR TS=(Bifidobacterium)) OR TS=(Clostridium)) OR TS=(Streptococcus) OR TS=(Enterococcus) and Preprint Citation Index (Exclude – Database) |
| #4 | #3 AND #2 AND #1 and Preprint Citation Index (Exclude – Database)                                                                                                                                                               |
| #5 | #4 and Preprint Citation Index (Exclude – Database) Timespan: 1950-01-01 to 2023-06-01 (Publication Date)                                                                                                                       |

### 2. Pubmed

|    |                                                                                                                                                                                                                                                                                                                                                                                                                                                                                                                                                                                                                                                                                                                                   |
|----|-----------------------------------------------------------------------------------------------------------------------------------------------------------------------------------------------------------------------------------------------------------------------------------------------------------------------------------------------------------------------------------------------------------------------------------------------------------------------------------------------------------------------------------------------------------------------------------------------------------------------------------------------------------------------------------------------------------------------------------|
| #1 | Search: ((irritable bowel syndrome[Title/Abstract] OR (IBS[Title/Abstract])) OR (irritable bowel syndrome[MeSH Terms])) Sort by: Most Recent                                                                                                                                                                                                                                                                                                                                                                                                                                                                                                                                                                                      |
| #2 | Search: (((((((Probiotic*[Title/Abstract] OR (Probiotic[MeSH Terms])) OR (Lactobacillus[Title/Abstract])) OR (Saccharomyces[Title/Abstract])) OR (Bacillus[Title/Abstract])) OR (Bifidobacterium[Title/Abstract])) OR (Clostridium[Title/Abstract])) OR (Streptococcus[Title/Abstract])) OR (Enterococcus[Title/Abstract])) Sort by: Most Recent                                                                                                                                                                                                                                                                                                                                                                                  |
| #3 | Search: (((((clinical trial[Title/Abstract] OR (clinical trials[MeSH Terms])) OR (clinical trial[Publication Type])) OR (random*[Title/Abstract])) OR (random allocation[MeSH Terms])) OR (therapeutic use[MeSH Subheading])) Sort by: Most Recent                                                                                                                                                                                                                                                                                                                                                                                                                                                                                |
| #4 | Search: (((irritable bowel syndrome[Title/Abstract] OR (IBS[Title/Abstract])) OR (irritable bowel syndrome[MeSH Terms])) AND (((((((Probiotic*[Title/Abstract] OR (Probiotic[MeSH Terms])) OR (Lactobacillus[Title/Abstract])) OR (Saccharomyces[Title/Abstract])) OR (Bacillus[Title/Abstract])) OR (Bifidobacterium[Title/Abstract])) OR (Clostridium[Title/Abstract])) OR (Streptococcus[Title/Abstract])) OR (Enterococcus[Title/Abstract])) AND (((((clinical trial[Title/Abstract] OR (clinical trials[MeSH Terms])) OR (clinical trial[Publication Type])) OR (random*[Title/Abstract])) OR (random allocation[MeSH Terms])) OR (therapeutic use[MeSH Subheading])) Sort by: Most Recent                                   |
| #5 | Search: (((irritable bowel syndrome[Title/Abstract] OR (IBS[Title/Abstract])) OR (irritable bowel syndrome[MeSH Terms])) AND (((((((Probiotic*[Title/Abstract] OR (Probiotic[MeSH Terms])) OR (Lactobacillus[Title/Abstract])) OR (Saccharomyces[Title/Abstract])) OR (Bacillus[Title/Abstract])) OR (Bifidobacterium[Title/Abstract])) OR (Clostridium[Title/Abstract])) OR (Streptococcus[Title/Abstract])) OR (Enterococcus[Title/Abstract])) AND (((((clinical trial[Title/Abstract] OR (clinical trials[MeSH Terms])) OR (clinical trial[Publication Type])) OR (random*[Title/Abstract])) OR (random allocation[MeSH Terms])) OR (therapeutic use[MeSH Subheading])) Filters: from 1950/1/1 - 2023/6/1 Sort by: Most Recent |

### 3. Cochrane Central Register of Controlled Trials

|    |                                                                                                                                     |
|----|-------------------------------------------------------------------------------------------------------------------------------------|
| #1 | MeSH descriptor: [Irritable Bowel Syndrome] explode all trees                                                                       |
| #2 | (irritable bowel syndrome):ti,ab,kw OR (IBS):ti,ab,kw                                                                               |
| #3 | (probiotic):ti,ab,kw OR (probiotics):ti,ab,kw                                                                                       |
| #4 | (Lactobacillus):ti,ab,kw OR (Saccharomyces):ti,ab,kw OR (Bacillus):ti,ab,kw OR (Bifidobacterium):ti,ab,kw OR (Clostridium):ti,ab,kw |
| #5 | (Streptococcus):ti,ab,kw OR (Enterococcus):ti,ab,kw                                                                                 |
| #6 | #1 OR #2                                                                                                                            |
| #7 | #3 OR #4 OR #5                                                                                                                      |
| #8 | #6 AND #7 with Cochrane Library publication date from Jan 1950 to Jun 2023                                                          |

#### 4. ClinicalTrials.gov

|                                   |                                          |
|-----------------------------------|------------------------------------------|
| Condition or disease:             | irritable bowel syndrome                 |
| Study type:                       | Interventional Studies (Clinical Trials) |
| Age                               | Adult (18 - 64) OR Older adult (65+)     |
| Date Range (Primary Completion):  | From 01/01/1950 To 06/01/2023            |
| All the rest options were default |                                          |

208

#### 5. Embase

Sources: Embase, MEDLINE and Preprints

|    |                                                                                                                                                                                                                                                                            |
|----|----------------------------------------------------------------------------------------------------------------------------------------------------------------------------------------------------------------------------------------------------------------------------|
| #1 | 'irritable bowel syndrome':ti,ab,kw OR 'ibs':ti,ab,kw OR 'irritable bowel syndrome'/exp OR 'ibs' OR 'irritable colon'/exp                                                                                                                                                  |
| #2 | 'probiotic':ti,ab,kw OR 'lactobacillus':ti,ab,kw OR 'saccharomyces':ti,ab,kw OR 'bacillus':ti,ab,kw<br>OR 'bifidobacterium':ti,ab,kw OR 'clostridium':ti,ab,kw OR 'streptococcus':ti,ab,kw OR 'enterococcus':ti,ab,kw<br>OR 'probiotic agent'/exp OR 'probiotics':ti,ab,kw |
| #3 | 'clinical trial':ti,ab,kw OR 'clinical trials':ti,ab,kw OR 'random*':ti,ab,kw OR 'clinical trial'/exp                                                                                                                                                                      |
| #4 | #1 AND #2 AND #3                                                                                                                                                                                                                                                           |
| #5 | #4 AND 'randomized controlled trial'/de                                                                                                                                                                                                                                    |

### **Text S3. Data collection process**

Two authors (PW Xie and M Luo) independently screened titles and abstracts of the search results. The full-text of remaining articles will be examined based on the defined eligibility criteria. The senior investigator (LS Xiong) conducted a discussion when disagreements occurred. Disagreements will be resolved by consensus. Two authors (XH Deng and JH Fan) used a piloted electronic form to extract data independently. The form was based on the Cochrane Collaboration's Data Collection Form Template. Data extraction includes the following items: RCT information (article title, first author, publication year, trial location, trial design, inclusion and exclusion criteria, composition and dose of probiotics, follow-up period), population characteristics (IBS diagnosis criteria, IBS duration and severity, sample size, gender, mean age or age range, BMI), outcomes of interest. For RCTs reported at different follow-up time, all relevant articles were included in the same group for data extraction. Corresponding authors were requested for original data by e-mail if the data of outcomes did not report in the full-text. Intention-to-treat analyses were used in data collection.

## Text S4. References to RCTs included in this network meta-analysis

1. Mourey F, Decherf A, Jeanne J-F, et al. *Saccharomyces cerevisiae* I-3856 in irritable bowel syndrome with predominant constipation. *World J Gastroenterol* 2022; 28(22): 2509-22.
2. Jung K, Kim A, Lee J-H, et al. Effect of Oral Intake of *Lactiplantibacillus plantarum* APSulloc 331261 (GTB1 (TM)) on Diarrhea-Predominant Irritable Bowel Syndrome: A Randomized, Double-Blind, Placebo-Controlled Study. *Nutrients* 2022; 14(10).
3. Bai T, Xu Z, Xia P, et al. The Short-Term Efficacy of *Bifidobacterium* Quadruple Viable Tablet in Patients With Diarrhea-Predominant Irritable Bowel Syndrome: Potentially Mediated by Metabolism Rather Than Diversity Regulation. *Am J Gastroenterol*. 2022: 10.14309/ajg.0000000000002147.
4. Xu H, Ma C, Zhao F, et al. Adjunctive treatment with probiotics partially alleviates symptoms and reduces inflammation in patients with irritable bowel syndrome. *Eur J Nutr*. 2021; 60(5): 2553-65.
5. Skrzydło-Radomska B, Prozorow-Król B, Cichoz-Lach H, et al. The Effectiveness and Safety of Multi-Strain Probiotic Preparation in Patients with Diarrhea-Predominant Irritable Bowel Syndrome: A Randomized Controlled Study. *Nutrients* 2021; 13(3).
6. Liu Y, Yu X, Yu L, et al. *Lactobacillus plantarum* CCFM8610 Alleviates Irritable Bowel Syndrome and Prevents Gut Microbiota Dysbiosis: A Randomized, Double-Blind, Placebo-Controlled, Pilot Clinical Trial. *Engineering* 2021; 7(3): 376-85.
7. Gupta AK, Maity C. Efficacy and safety of *Bacillus coagulans* LBSC in irritable bowel syndrome A prospective, interventional, randomized, double-blind, placebo-controlled clinical study CONSORT Compliant. *Medicine* 2021; 100(3).
8. Barraza-Ortiz DA, Perez-Lopez N, Medina-Lopez VM, et al. Combination of a Probiotic and an Antispasmodic Increases Quality of Life and Reduces Symptoms in Patients with Irritable Bowel Syndrome: A Pilot Study. *Dig Dis*. 2021; 39(3): 294-300.
9. Sadrin S, Sennoune S, Gout B, et al. A 2-strain mixture of *Lactobacillus acidophilus* in the treatment of irritable bowel syndrome: A placebo-controlled randomized clinical trial. *Dig Liver Dis*. 2020; 52(5): 534-40.
10. Martoni CJ, Srivastava S, Leyer GJ. *Lactobacillus acidophilus* DDS-1 and *Bifidobacterium lactis* UABla-12 Improve Abdominal Pain Severity and Symptomology in Irritable Bowel Syndrome: Randomized Controlled Trial. *Nutrients* 2020; 12(2).
11. Lewis ED, Antony JM, Crowley DC, et al. Efficacy of *Lactobacillus paracasei* HA-196 and *Bifidobacterium longum* R0175 in Alleviating Symptoms of Irritable Bowel Syndrome (IBS): A Randomized, Placebo-Controlled Study. *Nutrients* 2020; 12(4).
12. Kim J, Cho K, Kim JS, et al. Probiotic treatment induced change of inflammation related metabolites in IBS-D patients/double-blind, randomized, placebo-controlled trial. *Food Sci Biotechnol*. 2020; 29(6): 837-44.
13. Gayathri R, Aruna T, Malar S, Shilpa B, Dhanasekar KR. Efficacy of *Saccharomyces cerevisiae* CNCM I-3856 as an add-on therapy for irritable bowel syndrome. *Int J Colorectal Dis*. 2020; 35(1): 139-45.
14. Bonfrate L, Di Palo DM, Celano G, et al. Effects of *Bifidobacterium longum* BB536 and *Lactobacillus rhamnosus* HN001 in IBS patients. *Eur J Clin Invest*. 2020; 50(3).
15. Andresen V, Gschossmann J, Leyer P. Heat-inactivated *Bifidobacterium bifidum* MIMBb75 (SYN-HI-001) in the treatment of irritable bowel syndrome: a multicentre, randomised, double-blind, placebo-controlled clinical trial. *Lancet Gastroenterol Hepatol*. 2020; 5(7): 658-66.
16. Oh JH, Jang YS, Kang D, Chang DK, Min YW. Efficacy and Safety of New *Lactobacilli* Probiotics for Unconstipated Irritable Bowel Syndrome: A Randomized, Double-Blind, Placebo-Controlled Trial. *Nutrients* 2019; 11(12).
17. Madempudi RS, Ahire JJ, Neelamraju J, Tripathi A, Nanal S. Randomized clinical trial: the effect of probiotic *Bacillus coagulans* Unique IS2 vs. placebo on the symptoms management of irritable bowel syndrome in adults. *Sci Rep*. 2019; 9.
18. Ashtiani SY, Amery M. Effect of Multispecies Probiotic Supplementation on Irritable Bowel Syndrome. *J Pharm Res Int*. 2019; 28(6).
19. Sun Y-Y, Li M, Li Y-Y, et al. The effect of *Clostridium butyricum* on symptoms and fecal microbiota in diarrhea-dominant irritable bowel syndrome: a randomized, double-blind, placebo-controlled trial. *Sci Rep*. 2018; 8.
20. Shin SP, Choi YM, Kim WH, et al. A double blind, placebo-controlled, randomized clinical trial that breast milk derived *Lactobacillus gasseri* BNR17 mitigated diarrhea-dominant irritable bowel syndrome. *J Clin Biochem Nutr*. 2018; 62(2): 179-

21. Preston K, Krumian R, Hattner J, de Montigny D, Stewart M, Gaddam S. *Lactobacillus acidophilus* CL1285, *Lactobacillus casei* LBC80R and *Lactobacillus rhamnosus* CLR2 improve quality-of-life and IBS symptoms: a double-blind, randomised, placebo-controlled study. *Benefic Microbes*. 2018; 9(5): 697-706.
22. Kim JY, Park YJ, Lee HJ, Park MY, Kwon O. Effect of *Lactobacillus gasseri* BNR17 on irritable bowel syndrome: a randomized, double-blind, placebo-controlled, dose-finding trial. *Food Sci Biotechnol*. 2018; 27(3): 853-7.
23. Ishaque SM, Khosruzzaman SM, Ahmed DS, Sah MP. A randomized placebo-controlled clinical trial of a multi-strain probiotic formulation (Bio-Kult (R)) in the management of diarrhea- predominant irritable bowel syndrome. *BMC Gastroenterol*. 2018; 18.
24. Cremon C, Guglielmetti S, Gargari G, et al. Effect of *Lactobacillus paracasei* CNCM I-1572 on symptoms, gut microbiota, short chain fatty acids, and immune activation in patients with irritable bowel syndrome: A pilot randomized clinical trial. *United Eur Gastroenterol J*. 2018; 6(4): 604-13.
25. Pinto-Sanchez MI, Hall GB, Ghajar K, et al. Probiotic *Bifidobacterium longum* NCC3001 Reduces Depression Scores and Alters Brain Activity: A Pilot Study in Patients With Irritable Bowel Syndrome. *Gastroenterology* 2017; 153(2): 448-+.
26. Nobutani K, Sawada D, Fujiwara S, et al. The effects of administration of the *Lactobacillus gasseri* strain CP2305 on quality of life, clinical symptoms and changes in gene expression in patients with irritable bowel syndrome. *J Appl Microbiol*. 2017; 122(1): 212-24.
27. Hod K, Sperber AD, Ron Y, et al. A double-blind, placebo-controlled study to assess the effect of a probiotic mixture on symptoms and inflammatory markers in women with diarrhea-predominant IBS. *Neurogastroenterol Motil*. 2017; 29(7).
28. Thijssen AY, Clemens CHM, Vankerckhoven V, Goossens H, Jonkers DMAE, Masclee AAM. Efficacy of *Lactobacillus casei* Shirota for patients with irritable bowel syndrome. *Eur J Gastroenterol Hepatol*. 2016; 28(1): 8-14.
29. Spiller R, Pelerin F, Decherf AC, et al. Randomized double blind placebo-controlled trial of *Saccharomyces cerevisiae* CNCM I-3856 in irritable bowel syndrome: improvement in abdominal pain and bloating in those with predominant constipation. *United Eur Gastroenterol J*. 2016; 4(3): 353-62.
30. Mezzasalma V, Manfrini E, Ferri E, et al. A Randomized, Double-Blind, Placebo-Controlled Trial: The Efficacy of Multispecies Probiotic Supplementation in Alleviating Symptoms of Irritable Bowel Syndrome Associated with Constipation. *Biomed Research International* 2016; 2016.
31. Majeed M, Nagabhushanam K, Natarajan S, et al. *Bacillus coagulans* MTCC 5856 supplementation in the management of diarrhea predominant Irritable Bowel Syndrome: a double blind randomized placebo controlled pilot clinical study. *Nutr J*. 2016; 15.
32. Lyra A, Hillila M, Huttunen T, et al. Irritable bowel syndrome symptom severity improves equally with probiotic and placebo. *World J Gastroenterol* 2016; 22(48): 10631-42.
33. Yoon H, Park YS, Lee DH, Seo J-G, Shin CM, Kim N. Effect of administering a multi-species probiotic mixture on the changes in fecal microbiota and symptoms of irritable bowel syndrome: a randomized, double-blind, placebo-controlled trial. *J Clin Biochem Nutr*. 2015; 57(2): 129-34.
34. Wong RK, Yang C, Song G-H, Wong J, Ho K-Y. Melatonin Regulation as a Possible Mechanism for Probiotic (VSL#3) in Irritable Bowel Syndrome: A Randomized Double-Blinded Placebo Study. *Dig Dis Sci* 2015; 60(1): 186-94.
35. de Chambrun GP, Neut C, Chau A, et al. A randomized clinical trial of *Saccharomyces cerevisiae* versus placebo in the irritable bowel syndrome. *Dig Liver Dis*. 2015; 47(2): 119-24.
36. Yoon JS, Sohn W, Lee OY, et al. Effect of multispecies probiotics on irritable bowel syndrome: A randomized, double-blind, placebo-controlled trial. *J Gastroenterol Hepatol*. 2014; 29(1): 52-9.
37. Stevenson C, Blaauw R, Fredericks E, Visser J, Roux S. Randomized clinical trial: Effect of *Lactobacillus plantarum* 299 v on symptoms of irritable bowel syndrome. *Nutrition* 2014; 30(10): 1151-7.
38. Sisson G, Ayis S, Sherwood RA, Bjarnason I. Randomised clinical trial: a liquid multi-strain probiotic vs. placebo in the irritable bowel syndrome - a 12 week double-blind study. *Aliment Pharmacol Ther* 2014; 40(1): 51-62.
39. Shavakhi A, Minakari M, Farzamnia S, et al. The effects of multi-strain probiotic compound on symptoms and quality-of-life in patients with irritable bowel syndrome: A randomized placebo-controlled trial. *Adv Biomed Res*. 2014; 3: 140-.
40. Ludidi S, Jonkers DM, Koning CJ, et al. Randomized clinical trial on the effect of a multispecies probiotic on visceroperception in hypersensitive IBS patients. *Neurogastroenterol Motil*. 2014; 26(5): 705-14.

41. Lorenzo-Zuniga V, Llop E, Suarez C, et al. I.31, a new combination of probiotics, improves irritable bowel syndrome-related quality of life. *World J Gastroenterol* 2014; 20(26): 8709-16.
42. Jafari E, Vahedi H, Merat S, Momtahan S, Riahi A. Therapeutic Effects, Tolerability and Safety of a Multi-strain Probiotic in Iranian Adults with Irritable Bowel Syndrome and Bloating. *Arch Iran Med.* 2014; 17(7): 466-70.
43. Abbas Z, Yakoob J, Jafri W, et al. Cytokine and clinical response to *Saccharomyces boulardii* therapy in diarrhea-dominant irritable bowel syndrome: a randomized trial. *Eur J Gastroenterol Hepatol.* 2014; 26(6): 630-9.
44. Roberts LM, McCahon D, Holder R, Wilson S, Hobbs FDR. A randomised controlled trial of a probiotic 'functional food' in the management of irritable bowel syndrome. *BMC Gastroenterol.*2013; 13.
45. Lee J, Rheem S, Yun B, et al. Effects of probiotic yoghurt on symptoms and intestinal microbiota in patients with irritable bowel syndrome. *Int J Dairy Technol.* 2013; 66(2): 243-55.
46. Charbonneau D, Gibb RD, Quigley EMM. Fecal excretion of *Bifidobacterium infantis* 35624 and changes in fecal microbiota after eight weeks of oral supplementation with encapsulated probiotic. *Gut Microbes* 2013; 4(3): 201-11.
47. Cappello C, Tremolaterra F, Pascariello A, Ciacci C, Iovino P. A randomised clinical trial (RCT) of a symbiotic mixture in patients with irritable bowel syndrome (IBS): effects on symptoms, colonic transit and quality of life. *Int J Colorectal Dis.* 2013; 28(3): 349-58.
48. Begtrup LM, de Muckadell OBS, Kjeldsen J, Christensen Rd, Jarbol DE. Long-term treatment with probiotics in primary care patients with irritable bowel syndrome - a randomised, double-blind, placebo controlled trial. *Scand J Gastroenterol.* 2013; 48(10): 1127-35.
49. Amirmani B, Nikfam S, Albaji M, et al. Probiotic vs. Placebo in Irritable Bowel Syndrome:A Randomized Controlled Trial. *Middle East J Dig Dis.* 2013; 5(2): 98-102.
50. Kruis W, Chrubasik S, Boehm S, Stange C, Schulze J. A double-blind placebo-controlled trial to study therapeutic effects of probiotic *Escherichia coli* Nissle 1917 in subgroups of patients with irritable bowel syndrome. *Int J Colorectal Dis.* 2012; 27(4): 467-74.
51. Ducrotte P, Sawant P, Jayanthi V. Clinical trial: *Lactobacillus plantarum* 299v (DSM 9843) improves symptoms of irritable bowel syndrome. *World J Gastroenterol* 2012; 18(30): 4012-8.
52. Dapoigny M, Piche T, Ducrotte P, Linaud B, Cardot J-M, Bernalier-Donadille A. Efficacy and safety profile of LCR35 complete freeze-dried culture in irritable bowel syndrome: A randomized, double-blind study. *World J Gastroenterol* 2012; 18(17): 2067-75.
53. Cui S, Hu Y. Multistrain probiotic preparation significantly reduces symptoms of irritable bowel syndrome in a double-blind placebo-controlled study. *Int J Clin Exp Med.* 2012; 5(3): 238-44.
54. Cha BK, Jung SM, Choi CH, et al. The Effect of a Multispecies Probiotic Mixture on the Symptoms and Fecal Microbiota in Diarrhea-dominant Irritable Bowel Syndrome A Randomized, Double-blind, Placebo-controlled Trial. *J Clin Gastroenterol.* 2012; 46(3): 220-7.
55. Sondergaard B, Olsson J, Ohlson K, Svensson U, Bytzer P, Ekesbo R. Effects of probiotic fermented milk on symptoms and intestinal flora in patients with irritable bowel syndrome: A randomized, placebo-controlled trial. *Scand J Gastroenterol.* 2011; 46(6): 663-72.
56. Michail S, Kenche H. Gut Microbiota is Not Modified by Randomized, Double-Blind, Placebo-Controlled Trial of VSL#3 in Diarrhea-Predominant Irritable Bowel Syndrome. *Probiotics Antimicrob Proteins.*2011; 3(1): 1-7.
57. Guglielmetti S, Mora D, Gschwender M, Popp K. Randomised clinical trial: *Bifidobacterium bifidum* MIMBb75 significantly alleviates irritable bowel syndrome and improves quality of life - a double-blind, placebo-controlled study. *Aliment Pharmacol Ther.* 2011; 33(10): 1123-32.
58. Choi CH, Jo SY, Park HJ, Chang SK, Byeon J-S, Myung S-J. A Randomized, Double-blind, Placebo-controlled Multicenter Trial of *Saccharomyces boulardii* in Irritable Bowel Syndrome Effect on Quality of Life. *J Clin Gastroenterol.* 2011; 45(8): 679-83.
59. Simren M, Ohman L, Olsson J, et al. Clinical trial: the effects of a fermented milk containing three probiotic bacteria in patients with irritable bowel syndrome - a randomized, double-blind, controlled study. *Aliment Pharmacol Ther* 2010; 31(2): 218-27.
60. Ligaarden SC, Axelsson L, Naterstad K, Lydersen S, Farup PG. A candidate probiotic with unfavourable effects in subjects with irritable bowel syndrome: a randomised controlled trial. *BMC Gastroenterol.*2010; 10.
61. Hun L. Original Research: *Bacillus coagulans* Significantly Improved Abdominal Pain and Bloating in Patients with IBS.

62. Hong KS, Kang HW, Im JP, et al. Effect of Probiotics on Symptoms in Korean Adults with Irritable Bowel Syndrome. *Gut Liver.* 2009; 3(2): 101-7.
63. Enck P, Zimmermann K, Menke G, Klosterhalfen S. Randomized Controlled Treatment Trial of Irritable Bowel Syndrome with a Probiotic E.-coli Preparation (DSM17252) Compared to Placebo. *Z Gastroenterol.* 2009; 47(2): 209-14.
64. Dolin BJ. Effects of a Proprietary Bacillus Coagulans Preparation on Symptoms of Diarrhea-Predominant Irritable Bowel Syndrome. *Methods Find Exp Clin Pharmacol.* 2009; 31(10): 655-9.
65. Zeng J, Li YQ, Zuo XL, Zhen YB, Yang J, Liu CH. Clinical trial: effect of active lactic acid bacteria on mucosal barrier function in patients with diarrhoea-predominant irritable bowel syndrome. *Aliment Pharmacol Ther* 2008; 28(8): 994-1002.
66. Williams EA, Stimpson J, Wang D, et al. Clinical trial: a multistrain probiotic preparation significantly reduces symptoms of irritable bowel syndrome in a double-blind placebo-controlled study. *Aliment Pharmacol Ther* 2008; 29(1): 97-103.
67. Sinn DH, Song JH, Kim HJ, et al. Therapeutic effect of Lactobacillus acidophilus-SDC 2012, 2013 in patients with irritable bowel syndrome. *Dig Dis Sci* 2008; 53(10): 2714-8.
68. Kajander K, Myllyluoma E, Rajilic-Stojanovic M, et al. Clinical trial: multispecies probiotic supplementation alleviates the symptoms of irritable bowel syndrome and stabilizes intestinal microbiota. *Aliment Pharmacol Ther* 2008; 27(1): 48-57.
69. Enck P, Zimmermann K, Menke G, Mueller-Lissner S, Martens U, Klosterhalfen S. A mixture of Escherichia coli (DSM 17252) and Enterococcus faecalis (DSM 16440) for treatment of the irritable bowel syndrome - A randomized controlled trial with primary care physicians. *Neurogastroenterol Motil.* 2008; 20(10): 1103-9.
70. Drouault-Holowacz S, Bieuelet S, Burckel A, Cazaubiel M, Dray X, Marteau P. A double blind randomized controlled trial of a probiotic combination in 100 patients with irritable bowel syndrome. *Gastroenterol Clin Biol.* 2008; 32(2): 147-52.
71. Andriulli A, Neri M, Loguercio C, et al. Clinical trial on the efficacy of a new symbiotic formulation, Flortec, in patients with irritable bowel syndrome - A multicenter, randomized study. *J Clin Gastroenterol.* 2008; 42(8): S218-S23.
72. Agrawal A, Houghton LA, Morris J, et al. Clinical trial: the effects of a fermented milk product containing Bifidobacterium lactis DN-173 010 on abdominal distension and gastrointestinal transit in irritable bowel syndrome with constipation. *Aliment Pharmacol Ther* 2008; 29(1): 104-14.
73. Guyonnet D, Chassany O, Ducrotte P, et al. Effect of a fermented milk containing Bifidobacterium animalis DN-173 010 on the health-related quality of life and symptoms in irritable bowel syndrome in adults in primary care: a multicentre, randomized, double-blind, controlled trial. *Aliment Pharmacol Ther* 2007; 26(3): 475-86.
74. Whorwell PJ, Altringer L, Morel J, et al. Efficacy of an encapsulated probiotic Bifidobacterium infantis 35624 in women with irritable bowel syndrome. *Am J Gastroenterol* 2006; 101(7): 1581-90.
75. O'Mahony L, McCarthy J, Kelly P, et al. Lactobacillus and Bifidobacterium in irritable bowel syndrome: Symptom responses and relationship to cytokine profiles. *Gastroenterology* 2005; 128(3): 541-51.
76. Niv E, Naftali T, Hallak R, Vaisman N. The efficacy of Lactobacillus reuteri ATCC 55730 in the treatment of patients with irritable bowel syndrome - a double blind, placebo-controlled, randomized study. *Clin Nutr.* 2005; 24(6): 925-31.
77. Kim HJ, Roque MIV, Camilleri M, et al. A randomized controlled trial of a probiotic combination VSL# 3 and placebo in irritable bowel syndrome with bloating. *Neurogastroenterol Motil.* 2005; 17(5): 687-96.
78. Kajander K, Hatakka K, Poussa T, Markkila M, Korpela R. A probiotic mixture alleviates symptoms in irritable bowel syndrome patients: a controlled 6-month intervention. *Aliment Pharmacol Ther* 2005; 22(5): 387-94.
79. Kim HJ, Camilleri M, McKinzie S, et al. A randomized controlled trial of a probiotic, VSL#3, on gut transit and symptoms in diarrhoea-predominant irritable bowel syndrome. *Aliment Pharmacol Ther* 2003; 17(7): 895-904.
80. Niedzielin K, Kordecki H, Birkenfeld B. A controlled, double-blind, randomized study on the efficacy of Lactobacillus plantarum 299V in patients with irritable bowel syndrome. *Eur J Gastroenterol Hepatol.* 2001; 13(10): 1143-7.
81. Nobaek S, Johansson ML, Molin G, Ahrne S, Jeppsson B. Alteration of intestinal microflora is associated with reduction in abdominal bloating and pain in patients with irritable bowel syndrome. *Am J Gastroenterol* 2000; 95(5): 1231-8.

**Figure S1. The distribution of effect modifiers.**  
**1. The mean age of participants in probiotic groups.**

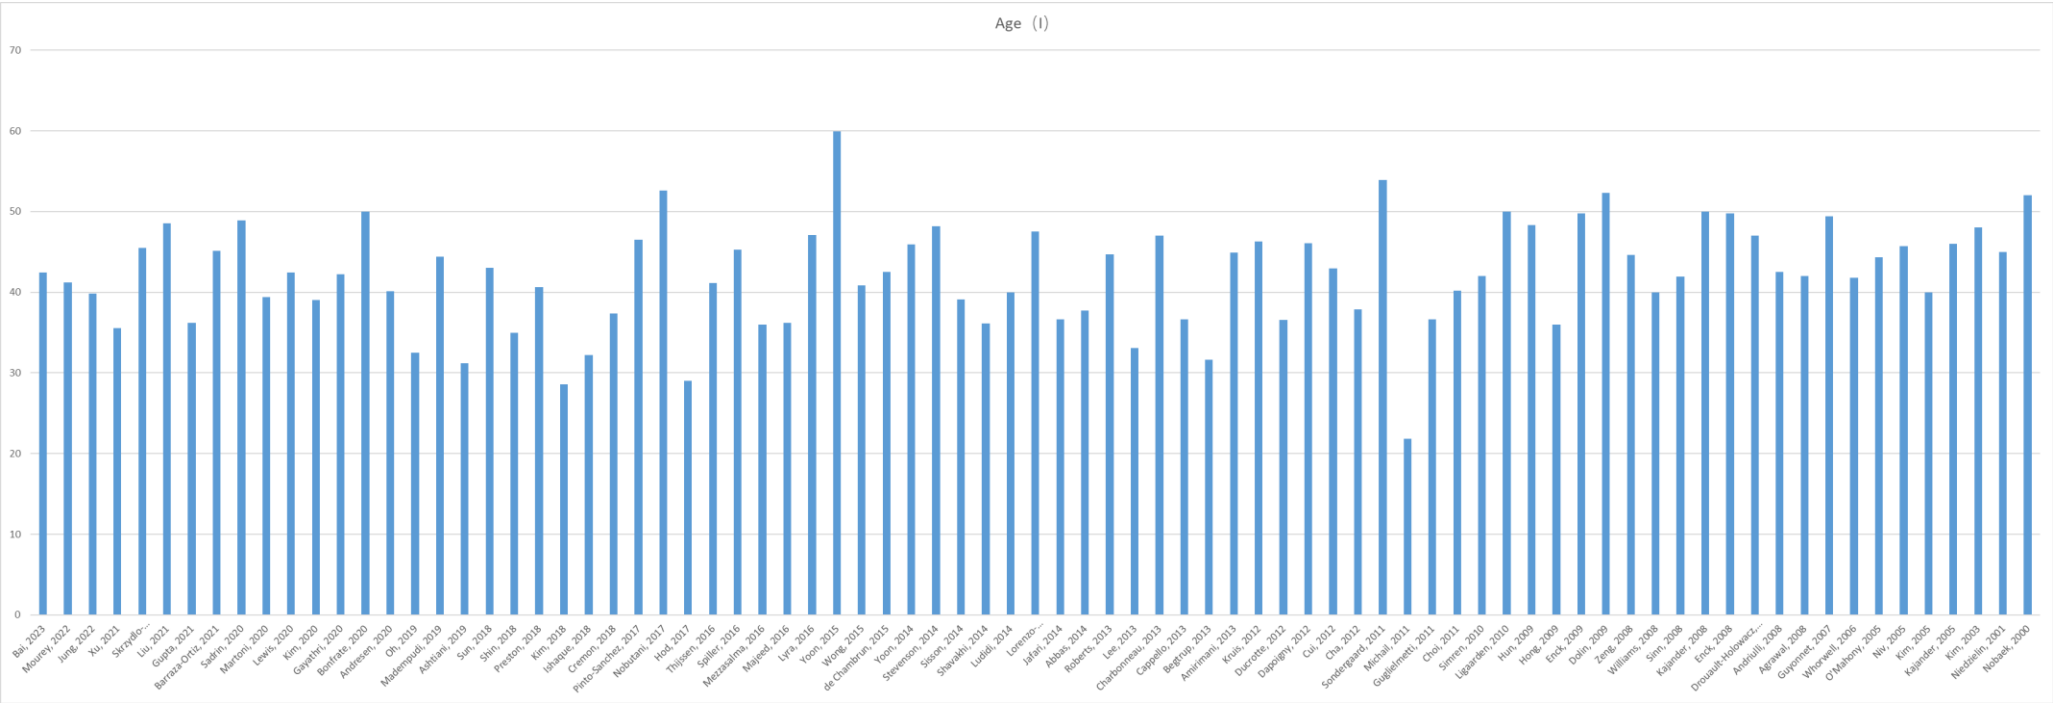

2. The mean age of participants in control groups.

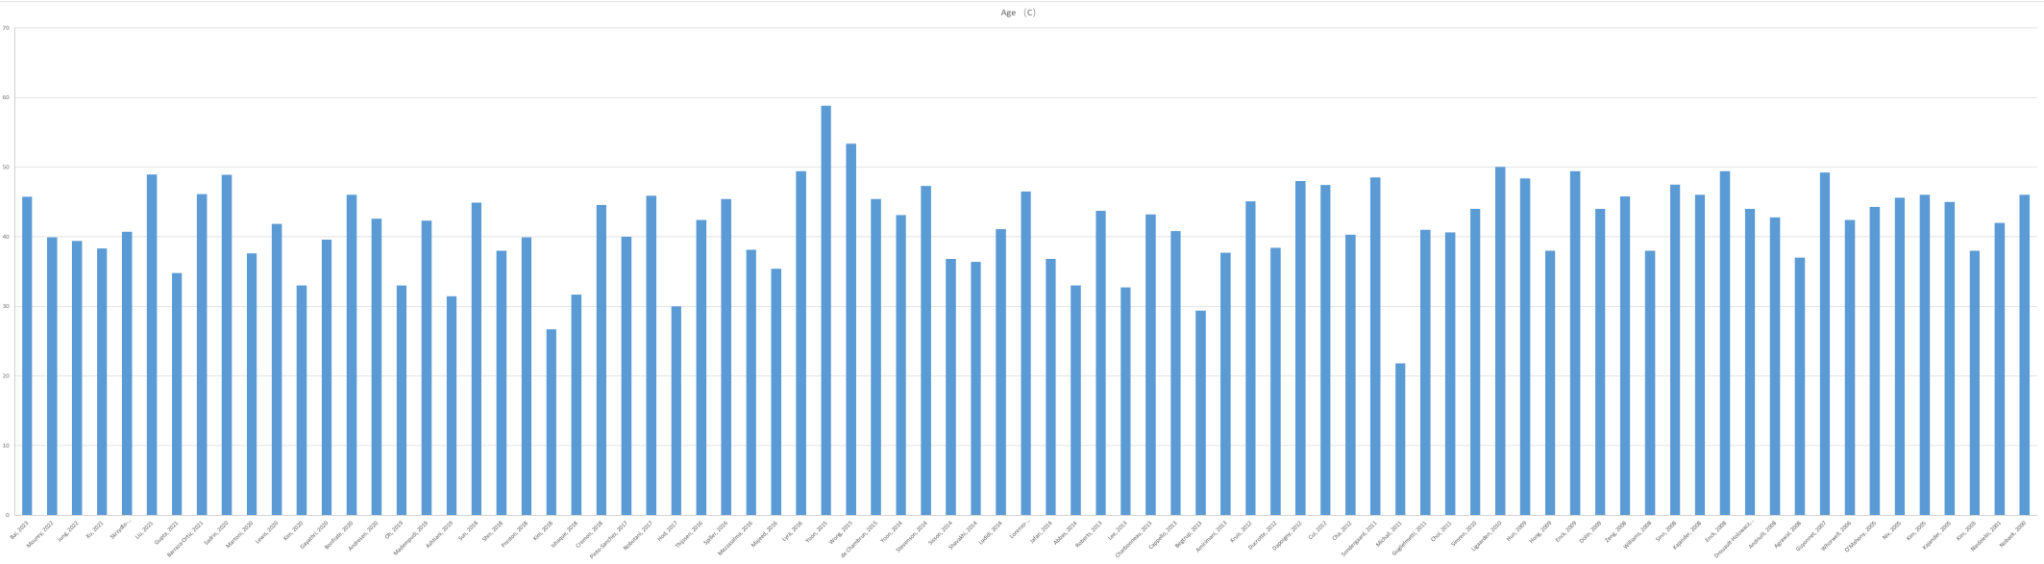

3. The proportion of females in included studies.

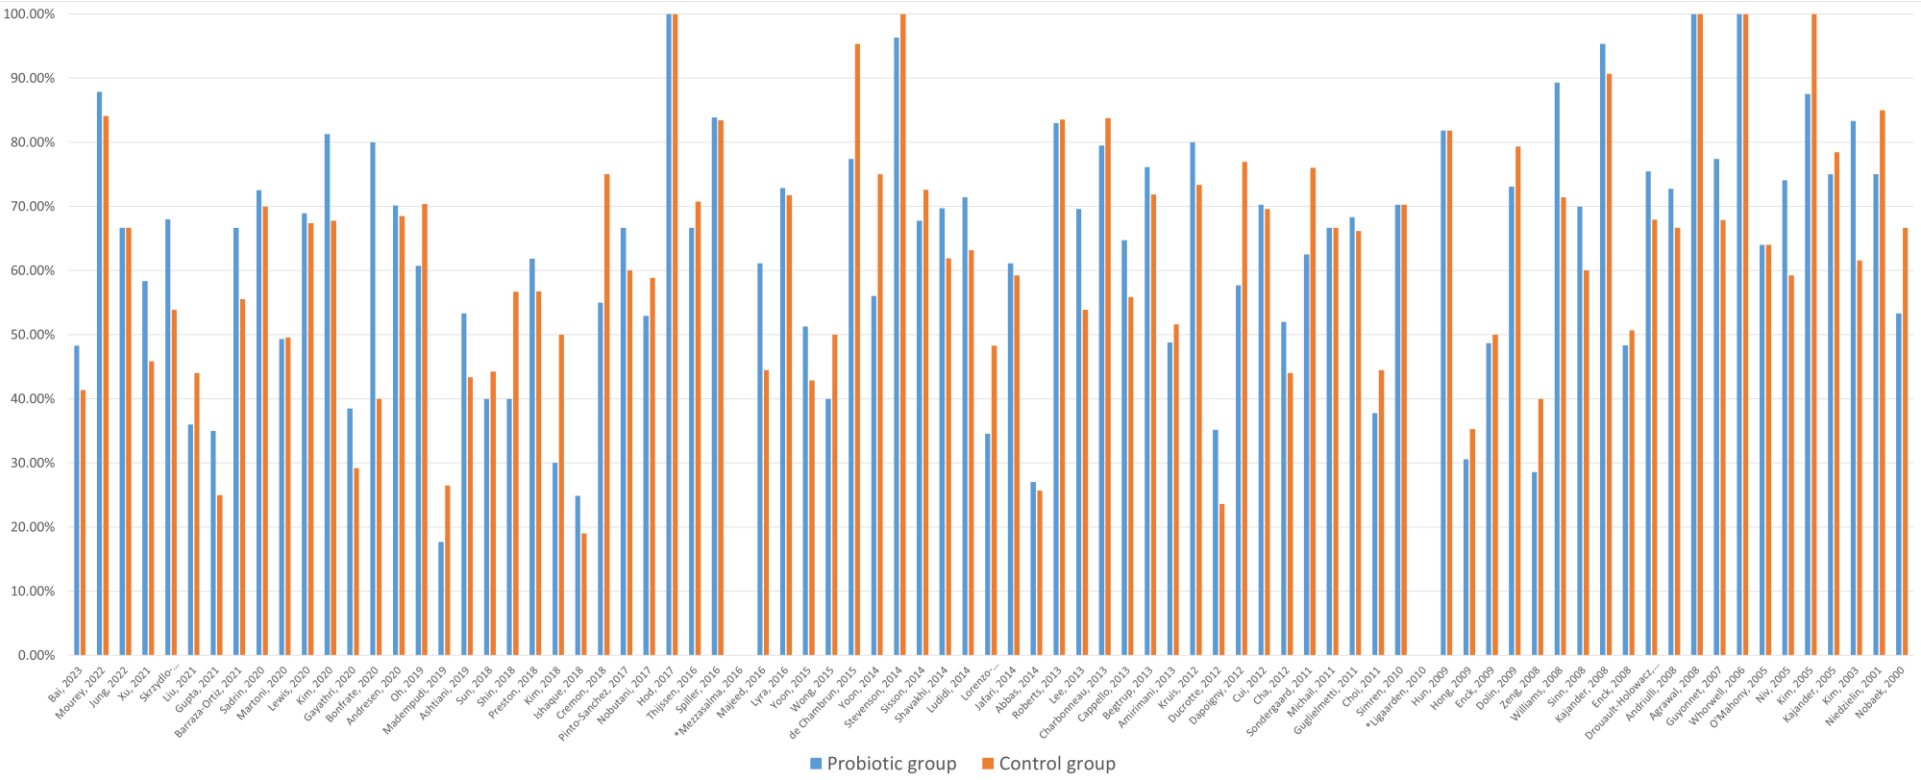

Figure S2. Risk of bias 2 evaluations for each outcome

1. IBS-SSS (a) and IBS-QOL(b)

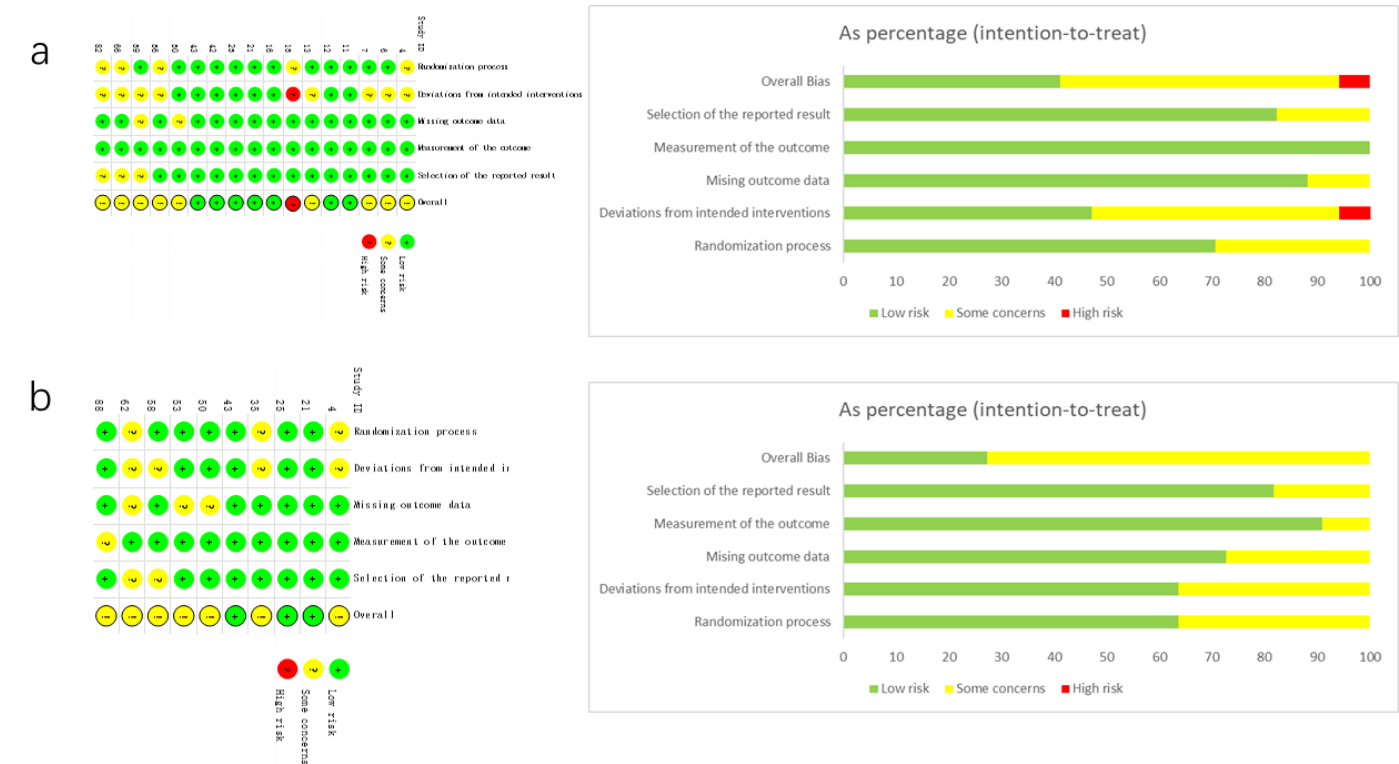

## 2. HADS-total score (a), HADS-anxiety (b), and HADS-depression (c)

a

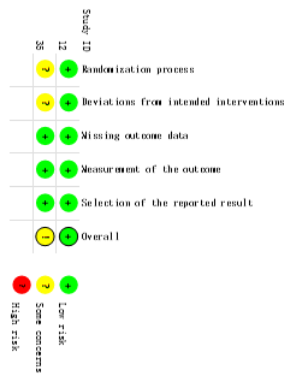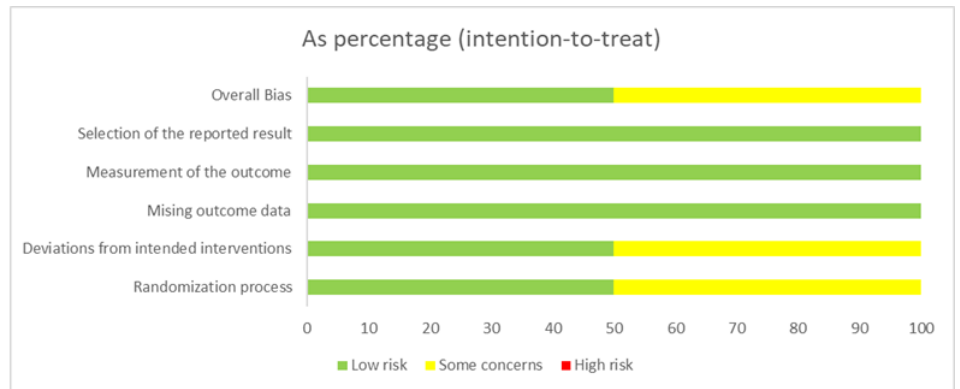

b

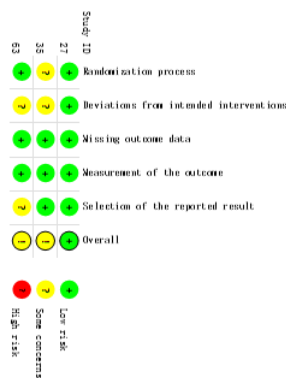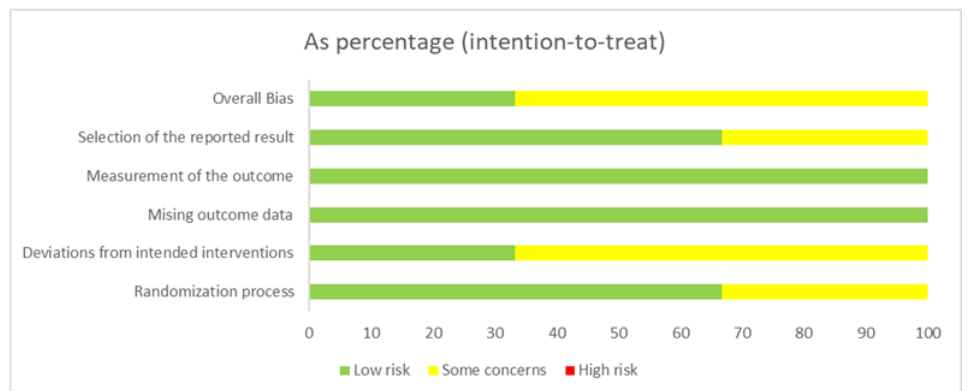

c

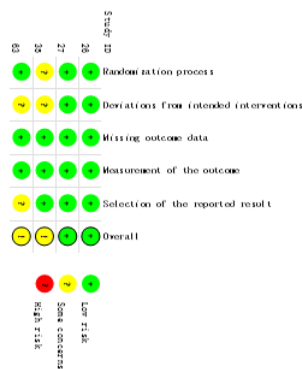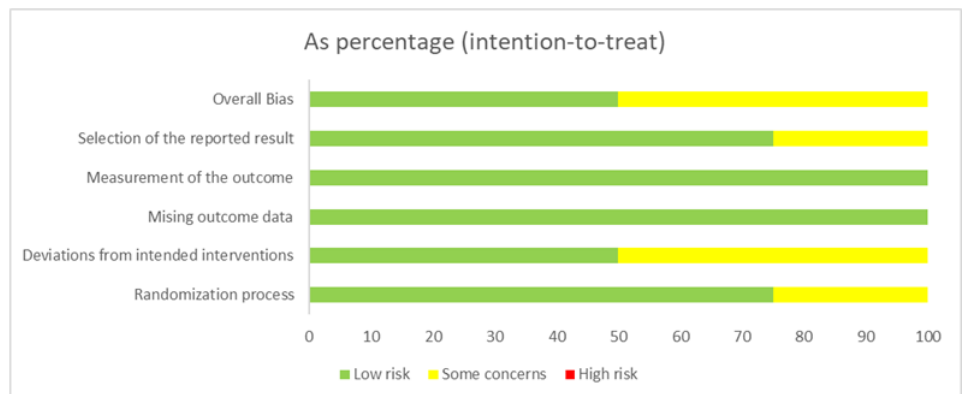

### 3. Abdominal pain score (a) and abdominal bloating score (b)

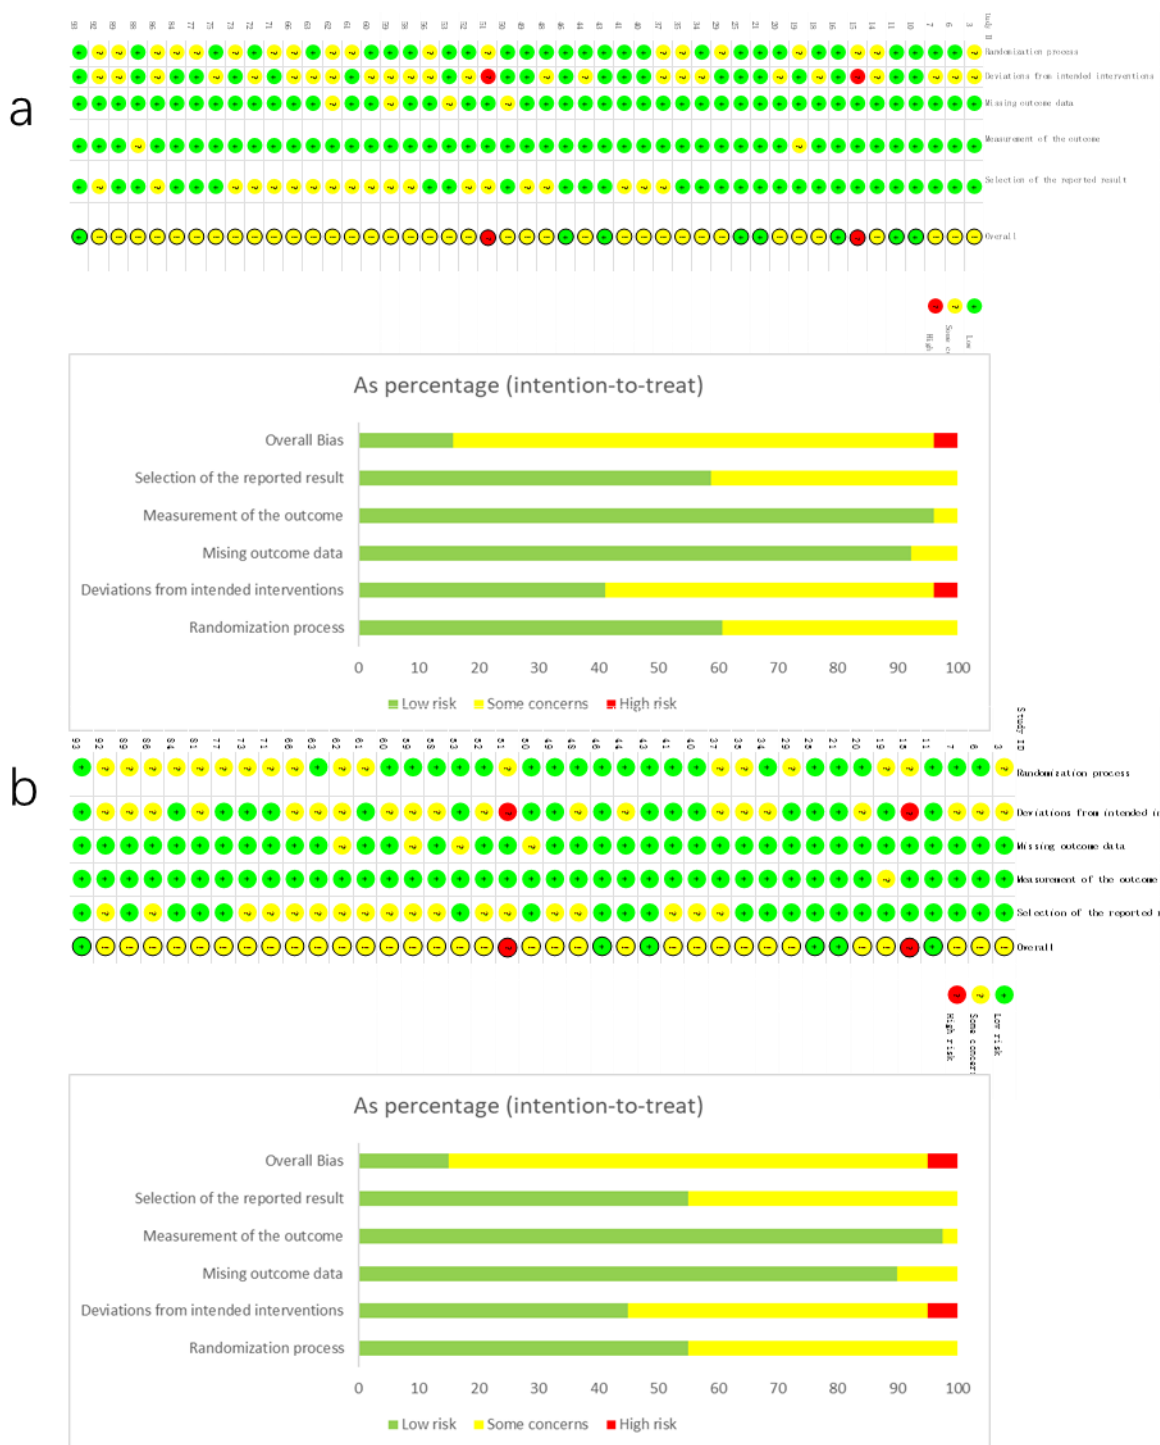

#### 4. Bowel movement frequency in IBS-D (a) and IBS-C (b)

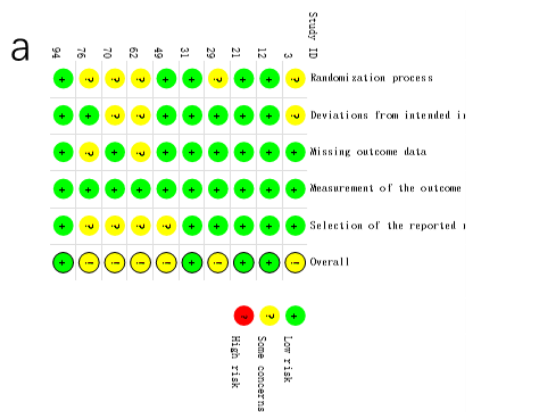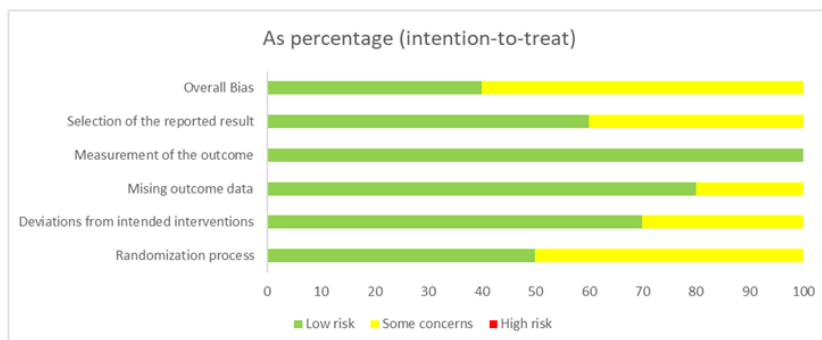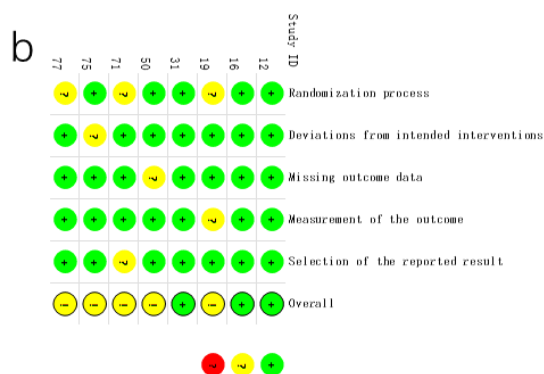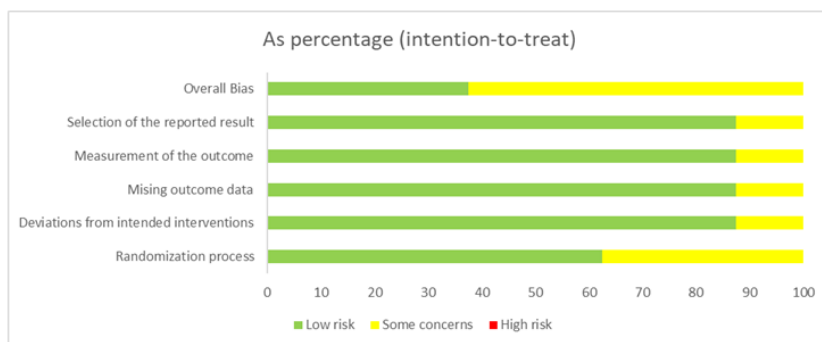

#### 5. Bristol stool form scale in IBS-D (a) and IBS-C (b)

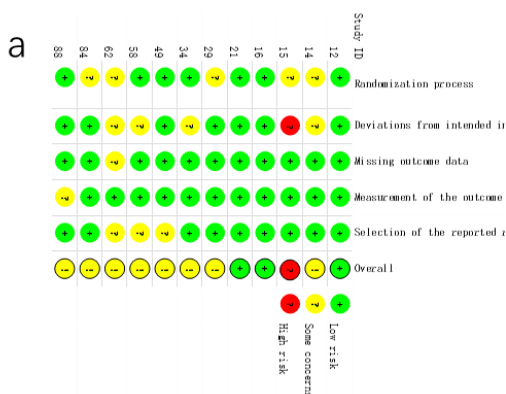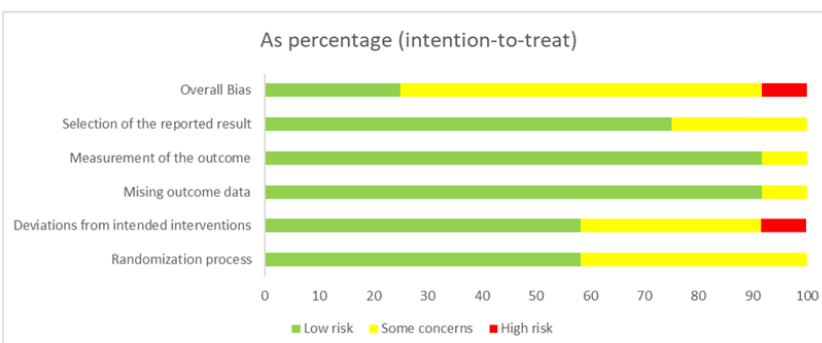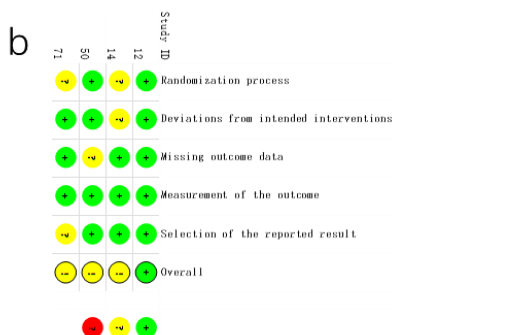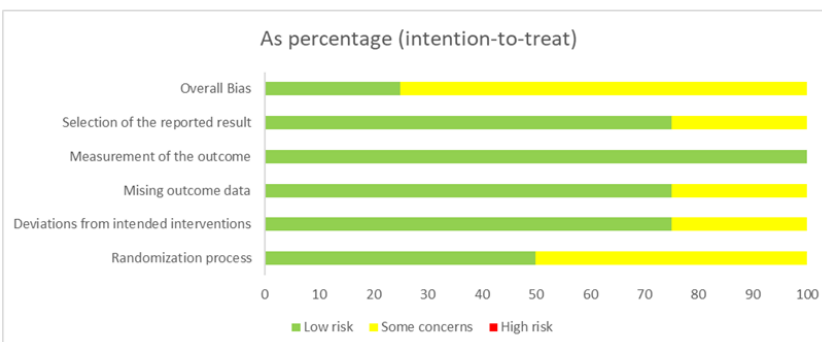

### Figure S3. Network plots

Different probiotics are represented by nodes. The size of each node is proportional to the number of patients. The width of the edges represents the number of RCTs.

#### 1. IBS-SSS

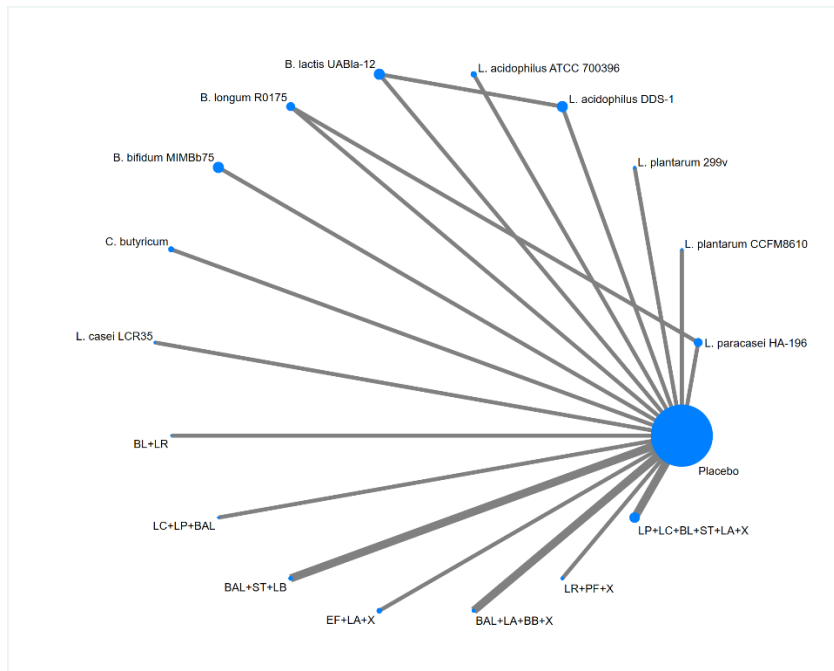

#### 2. IBS-QOL

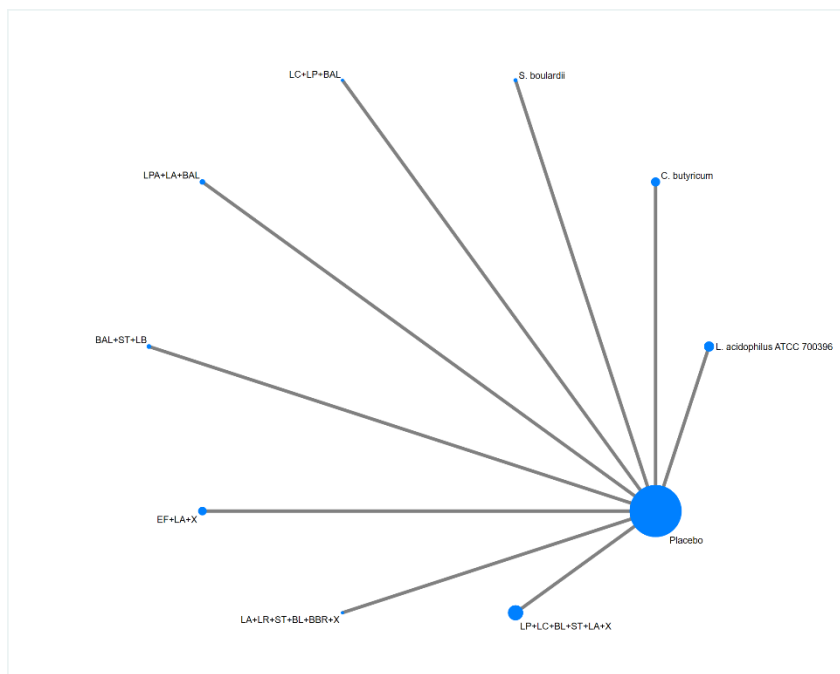

3. HADS-total score (a), HADS-anxiety (b), and HADS-depression (c)

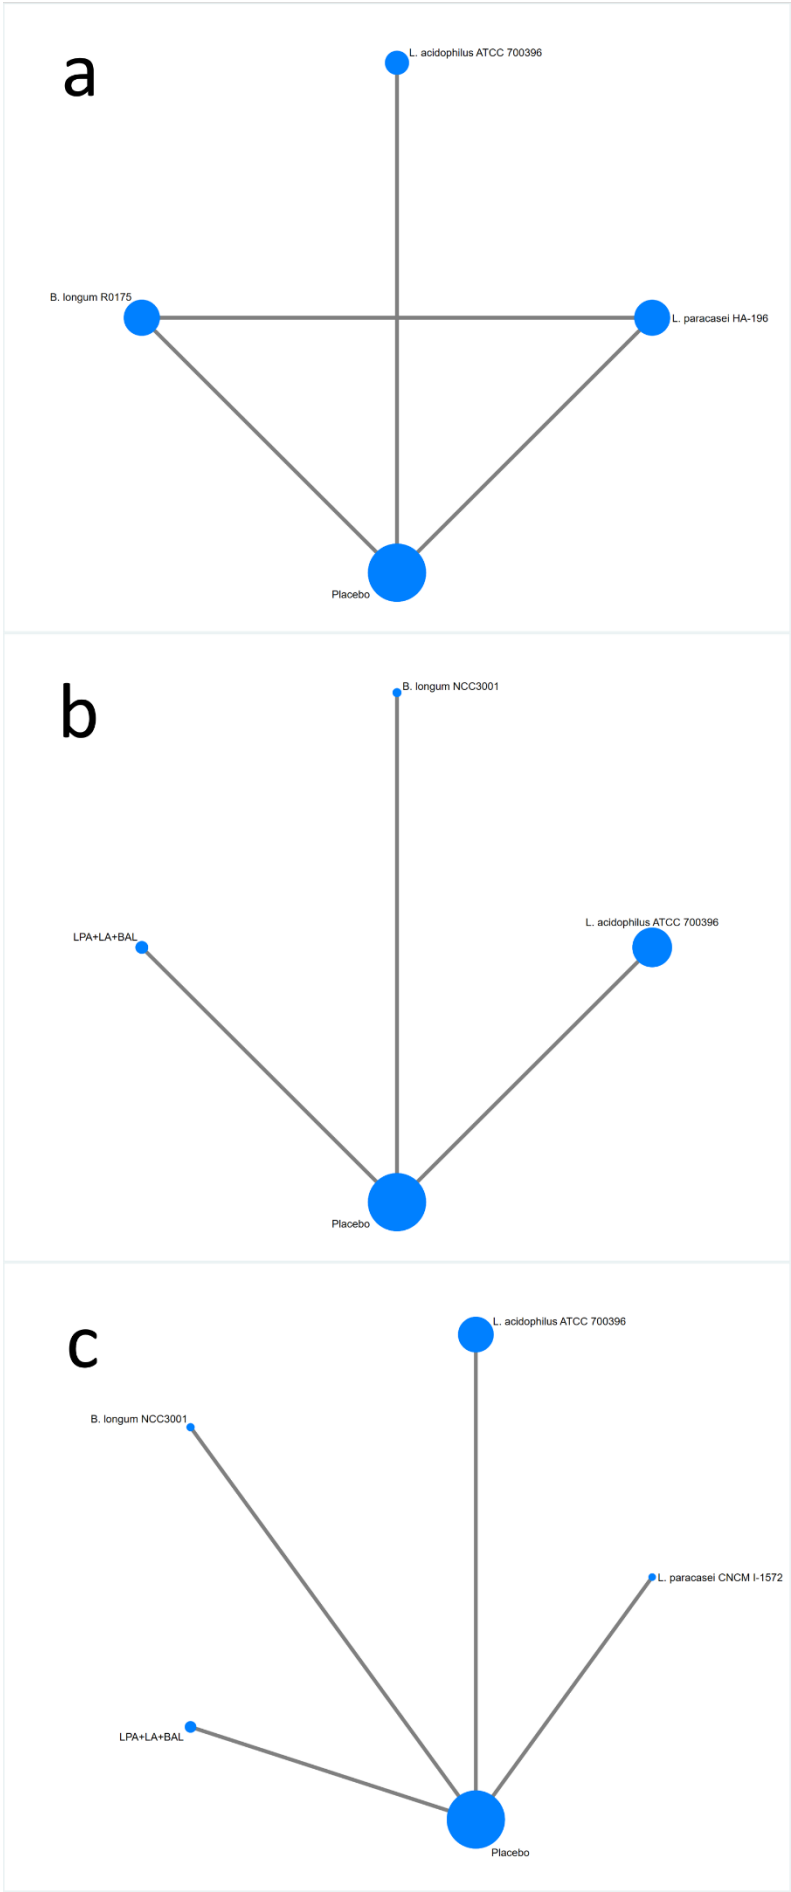

#### 4. Abdominal pain score

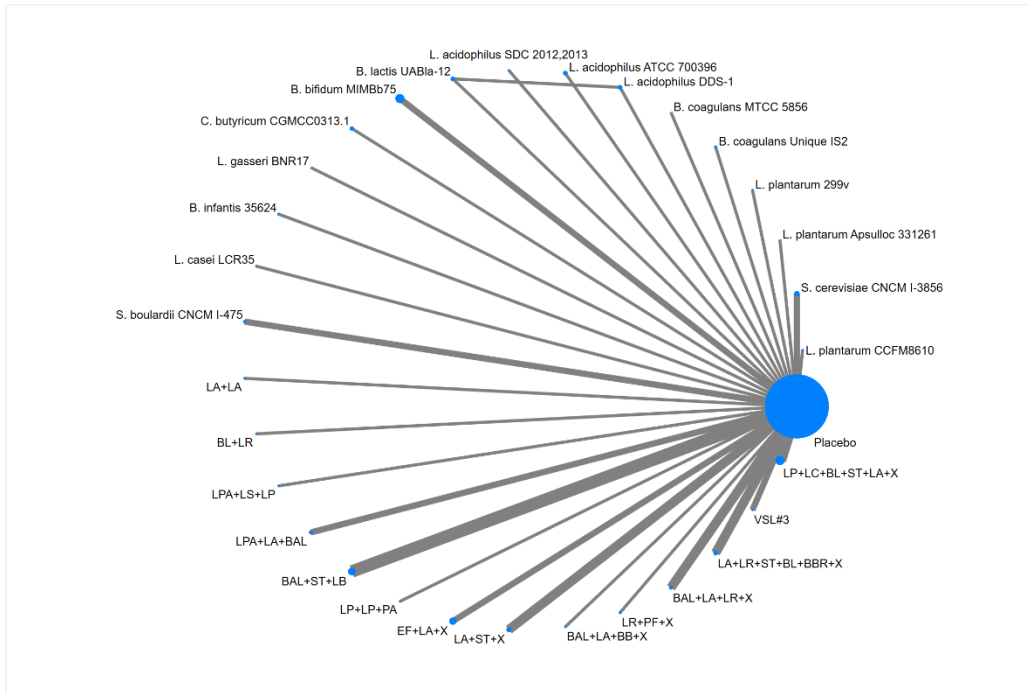

#### 5. Abdominal bloating score

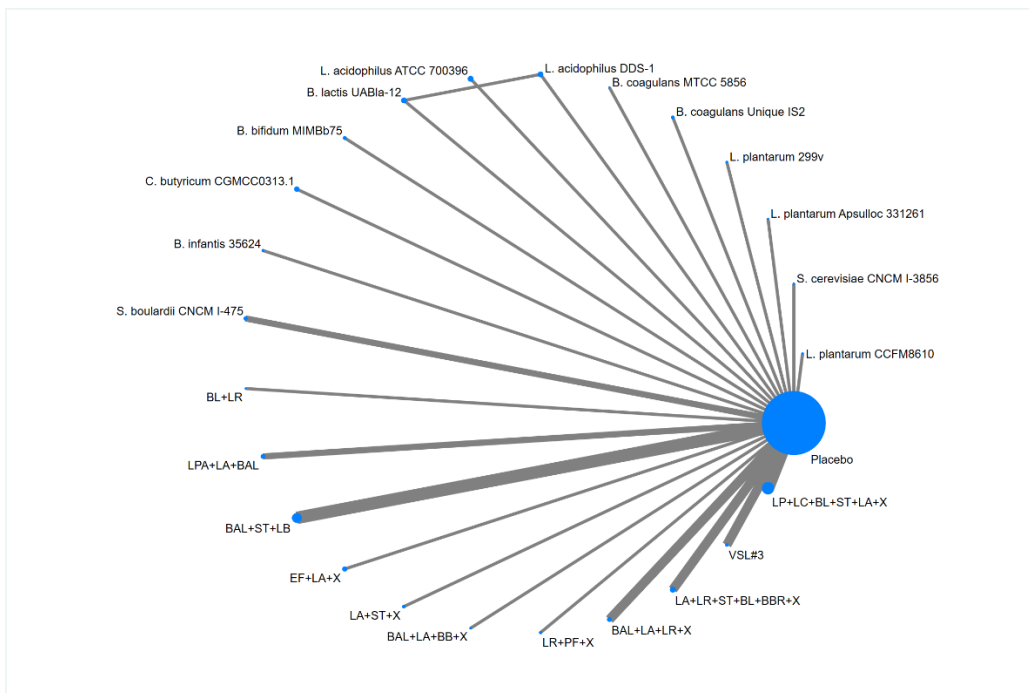

6. Bowel movement frequency (per week) in IBS-D (a) and IBS-C (b).

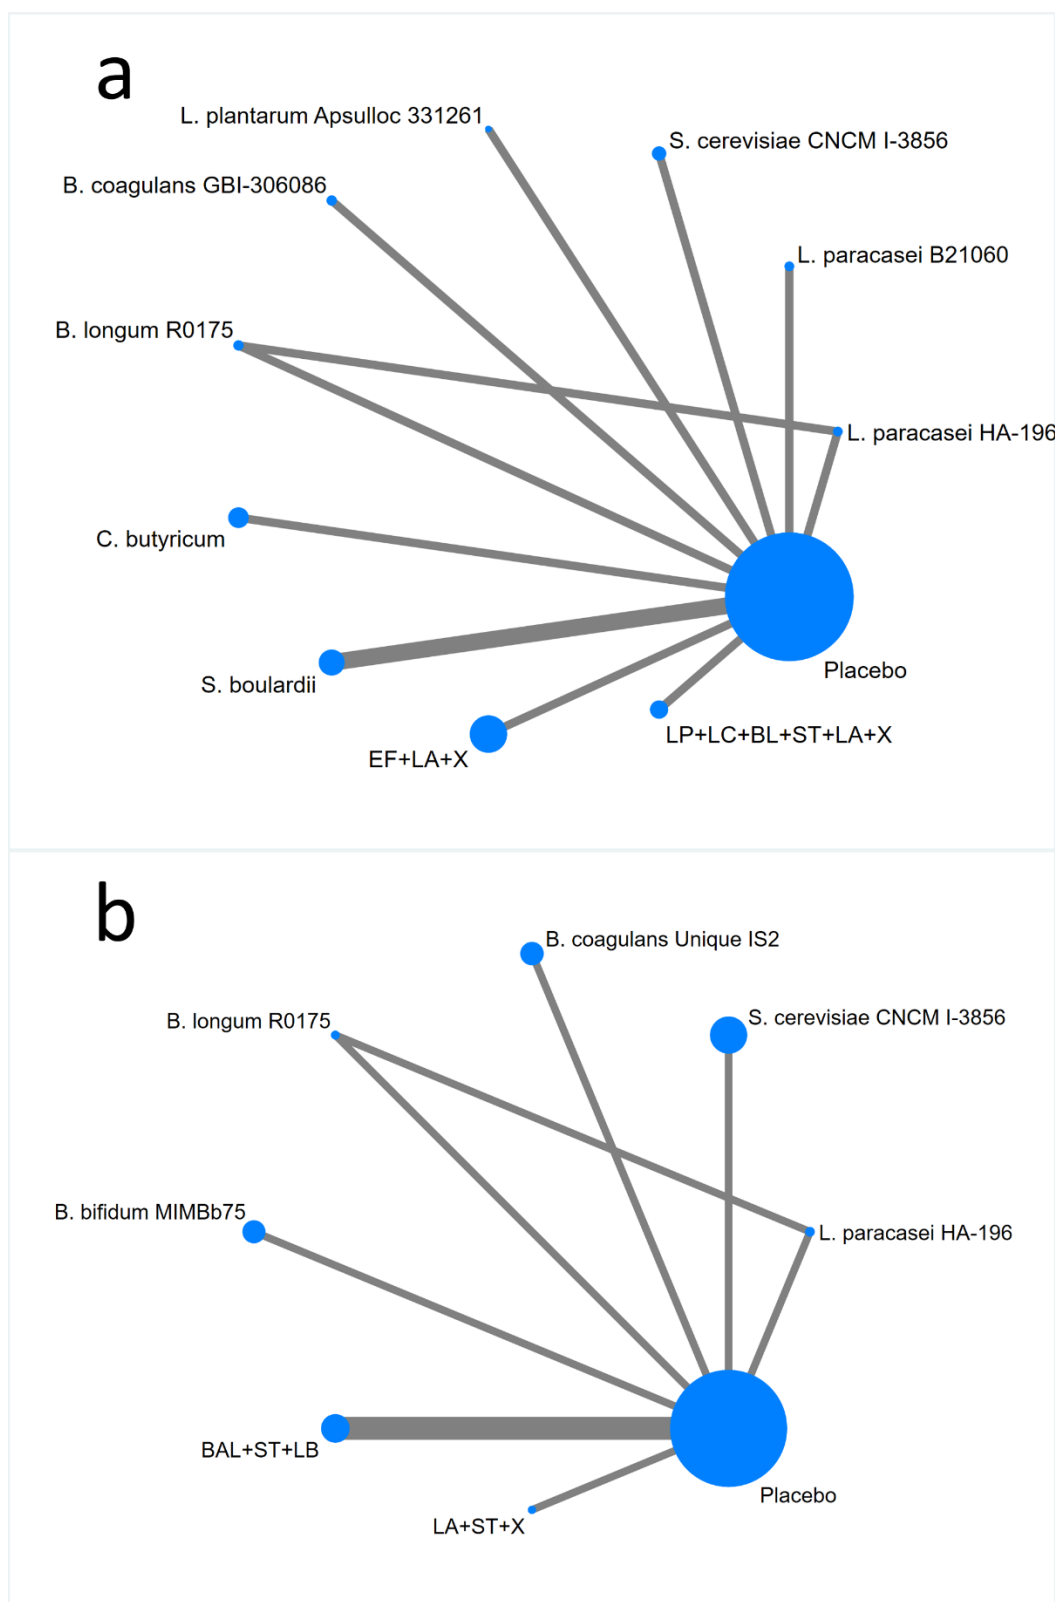

7. Bristol stool form scale in IBS-D (a) and IBS-C (b)

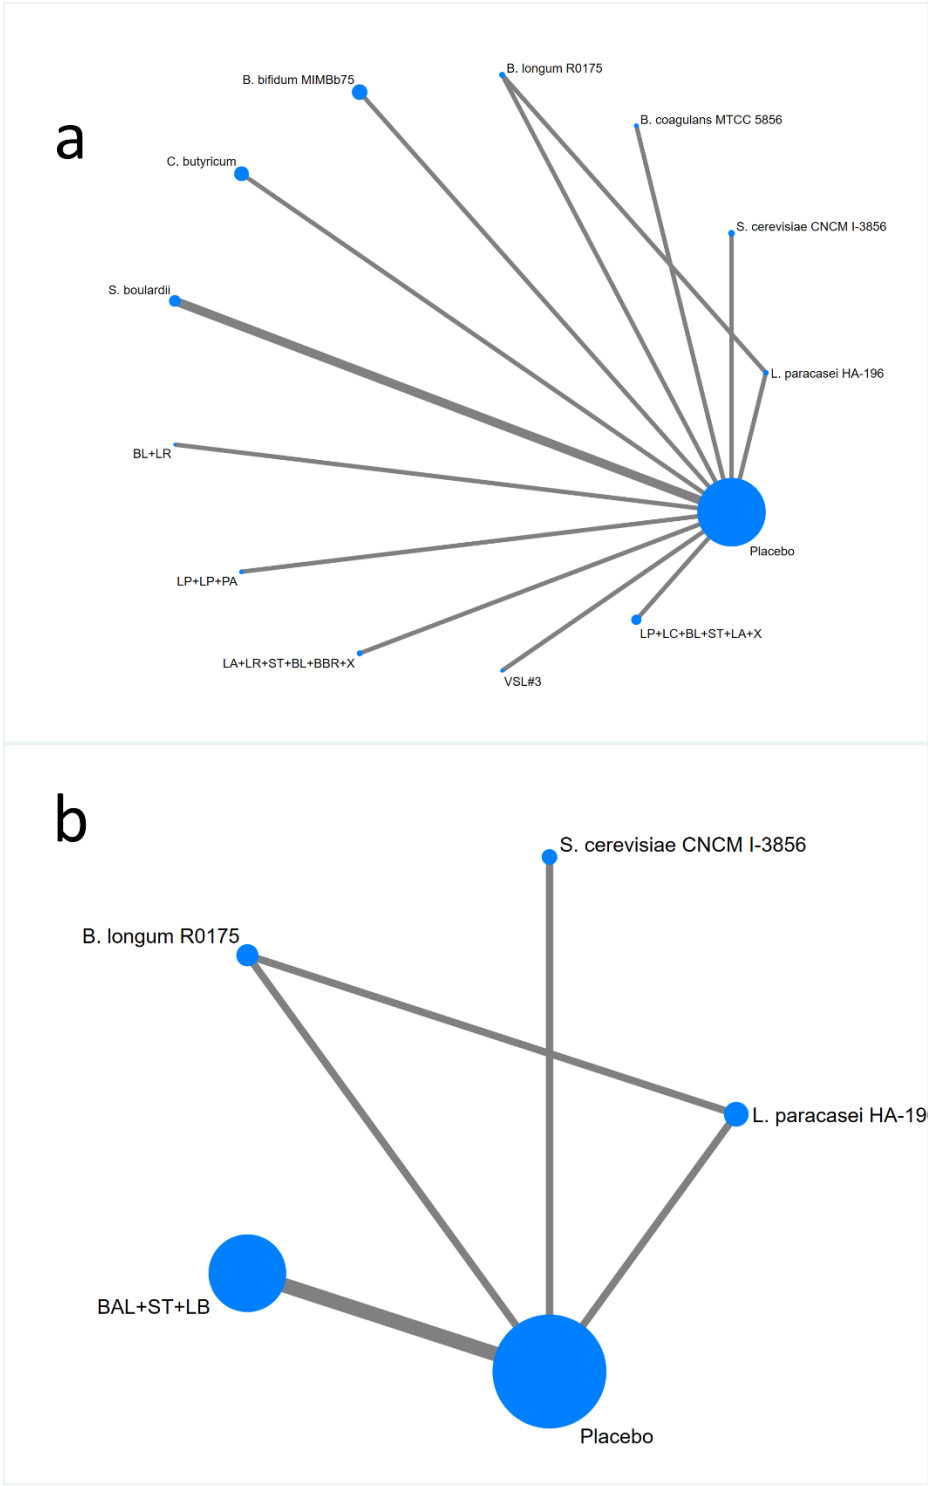

**Figure S4. Cumulative Ranking Curves for each Outcome**

IBS-SSS, IBS Symptom Severity Scale; IBS-QOL, IBS-Quality of Life Measure; HADS, the Hospital Anxiety and Depression Scale.

## 1. IBS-SSS

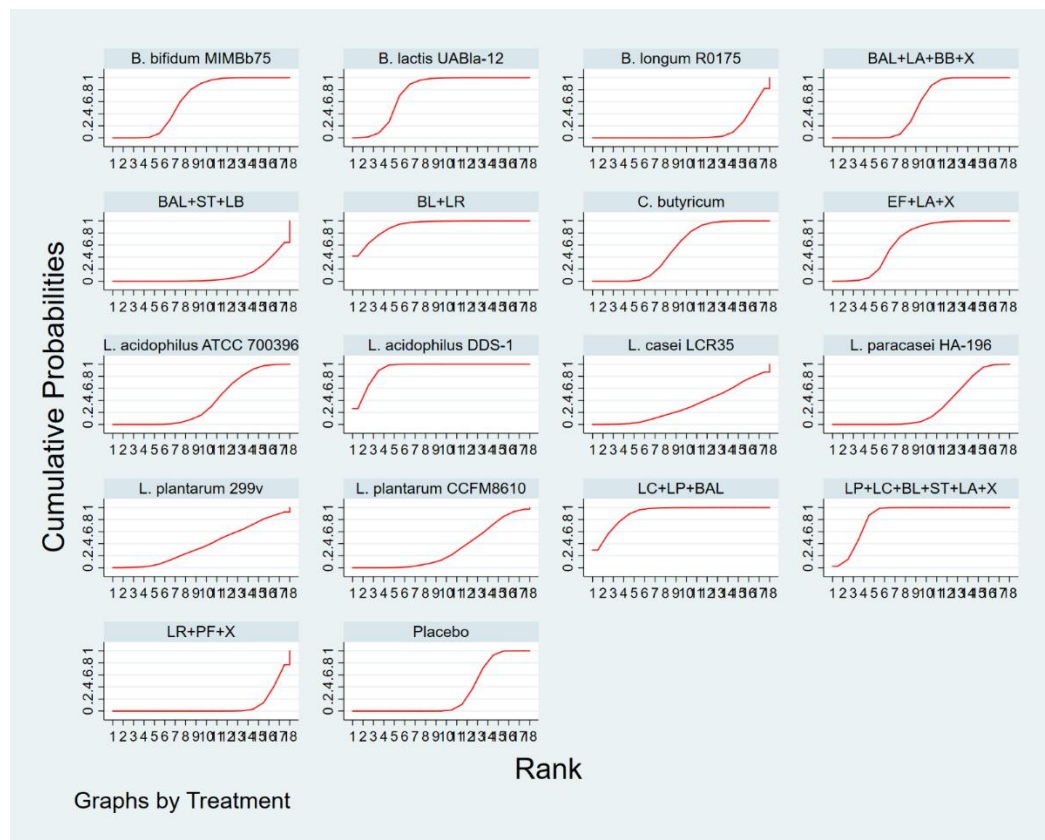

## 2. IBS-QOL

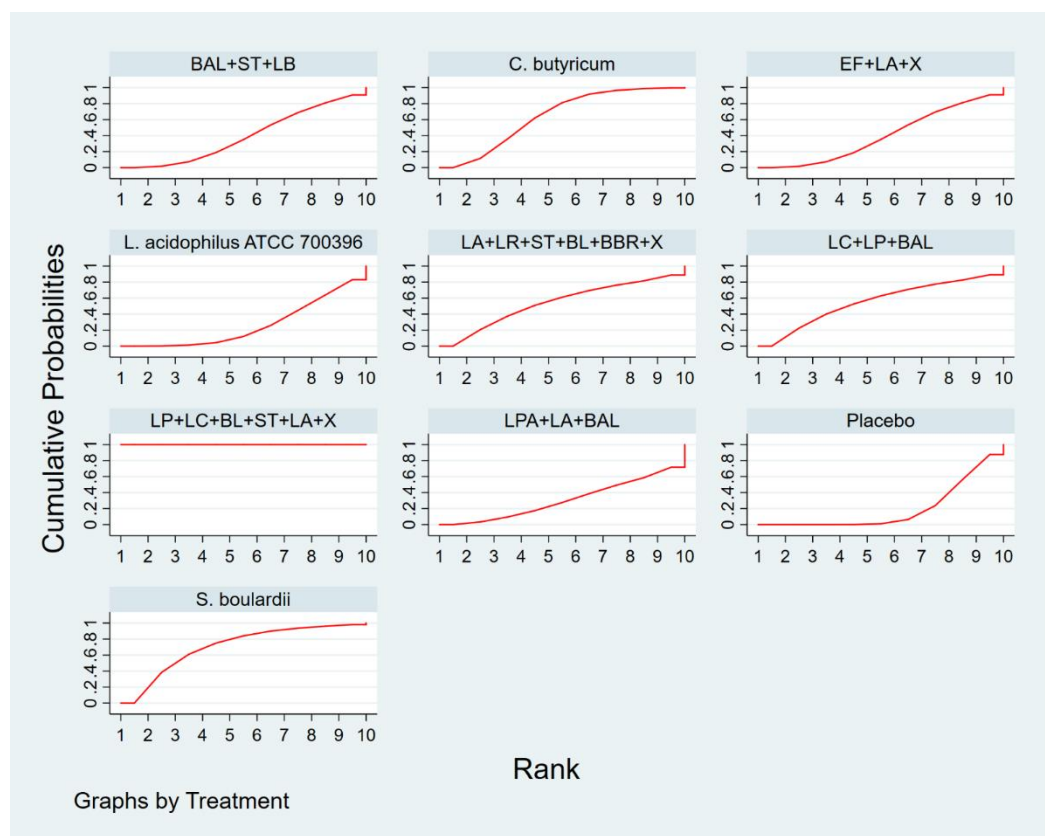

### 3. HADS-total score (a), HADS-anxiety (b), and HADS-depression (c)

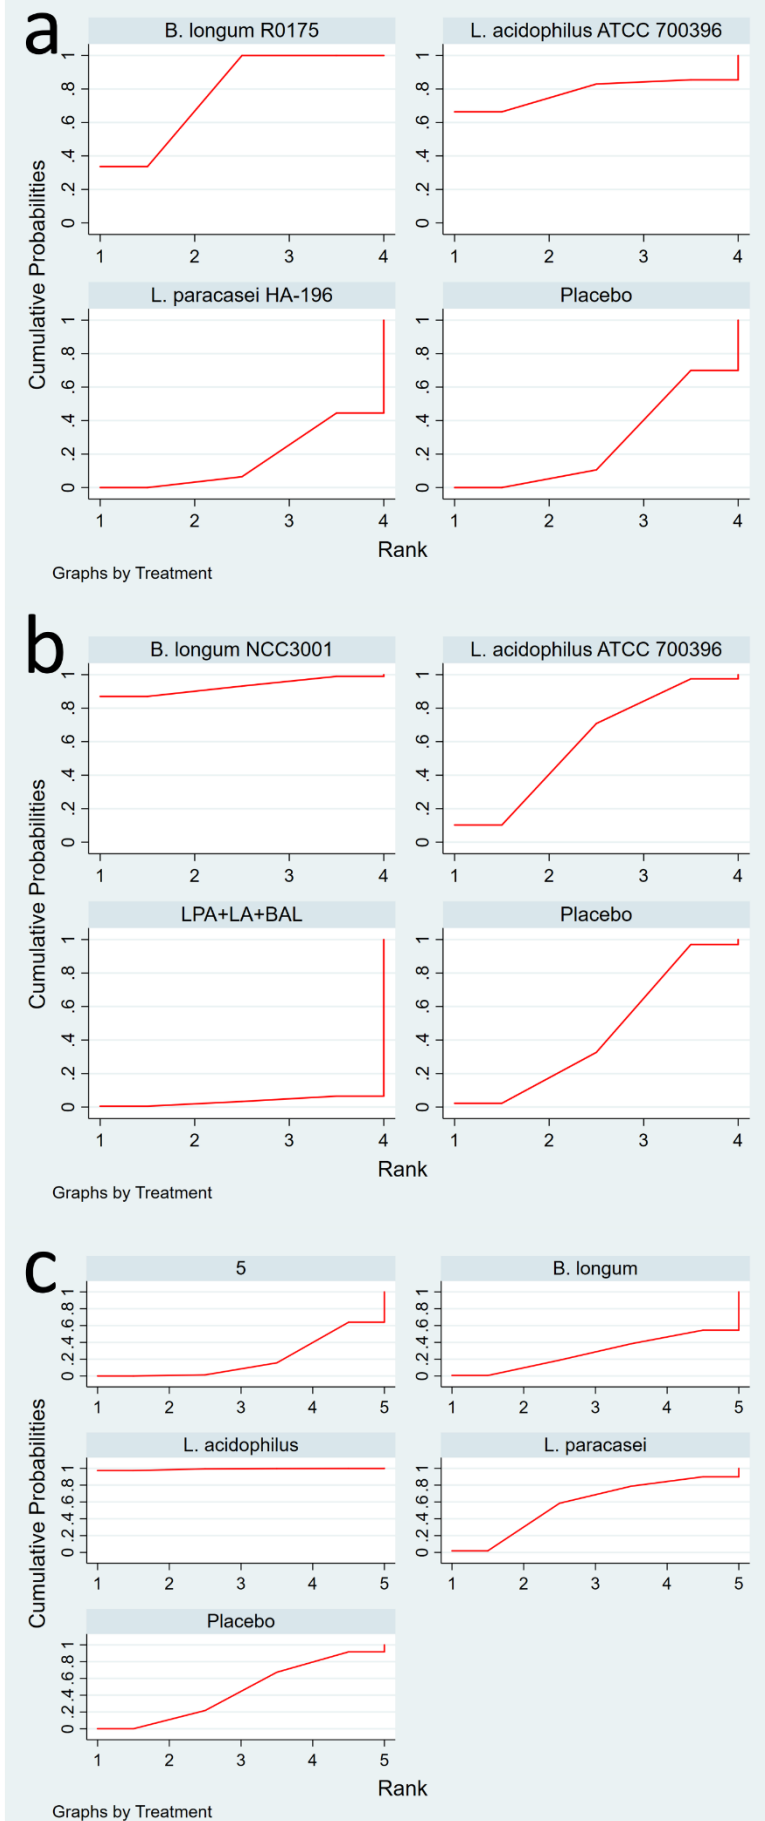

#### 4. Abdominal pain score

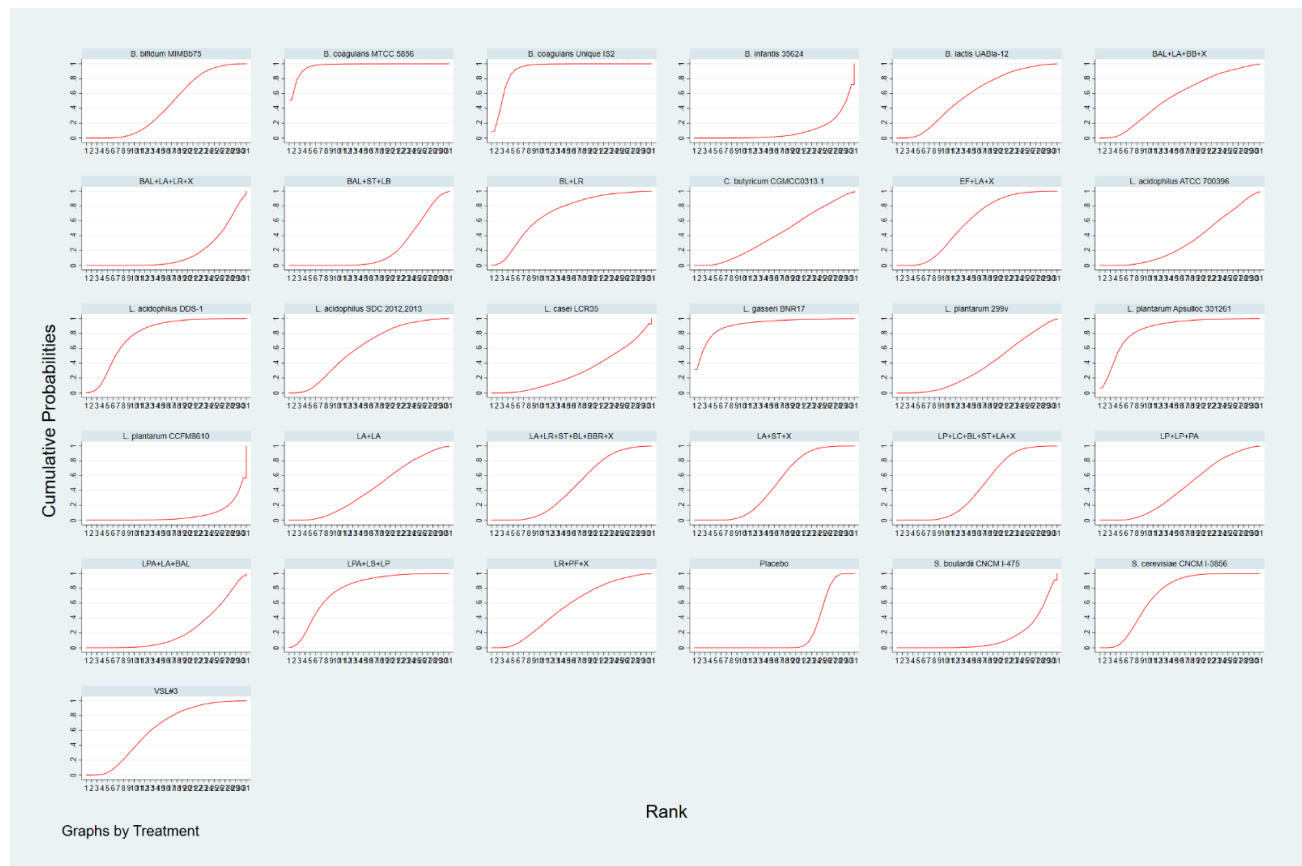

#### 5. Abdominal bloating score

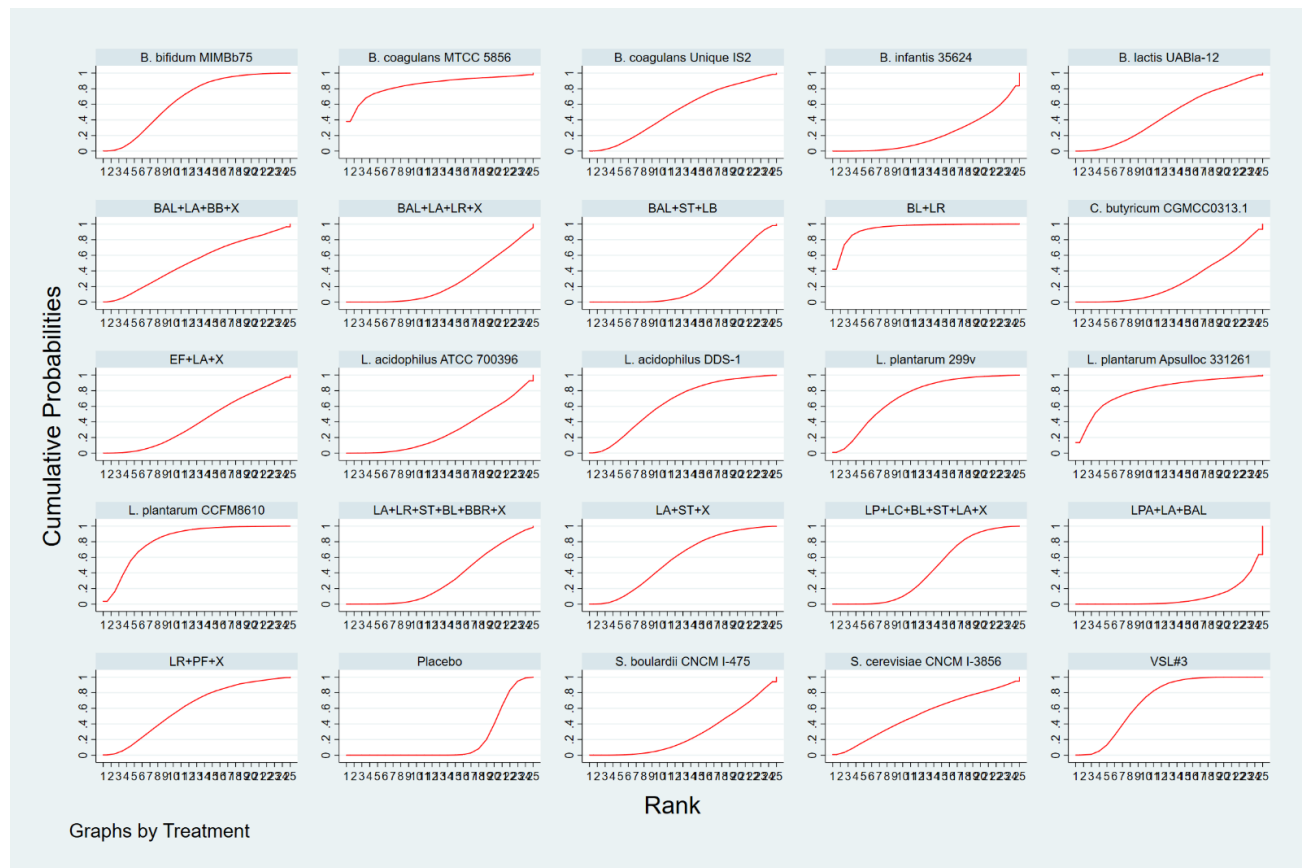

6. Bowel movement frequency (per week) in IBS-D (a) and IBS-D (b)

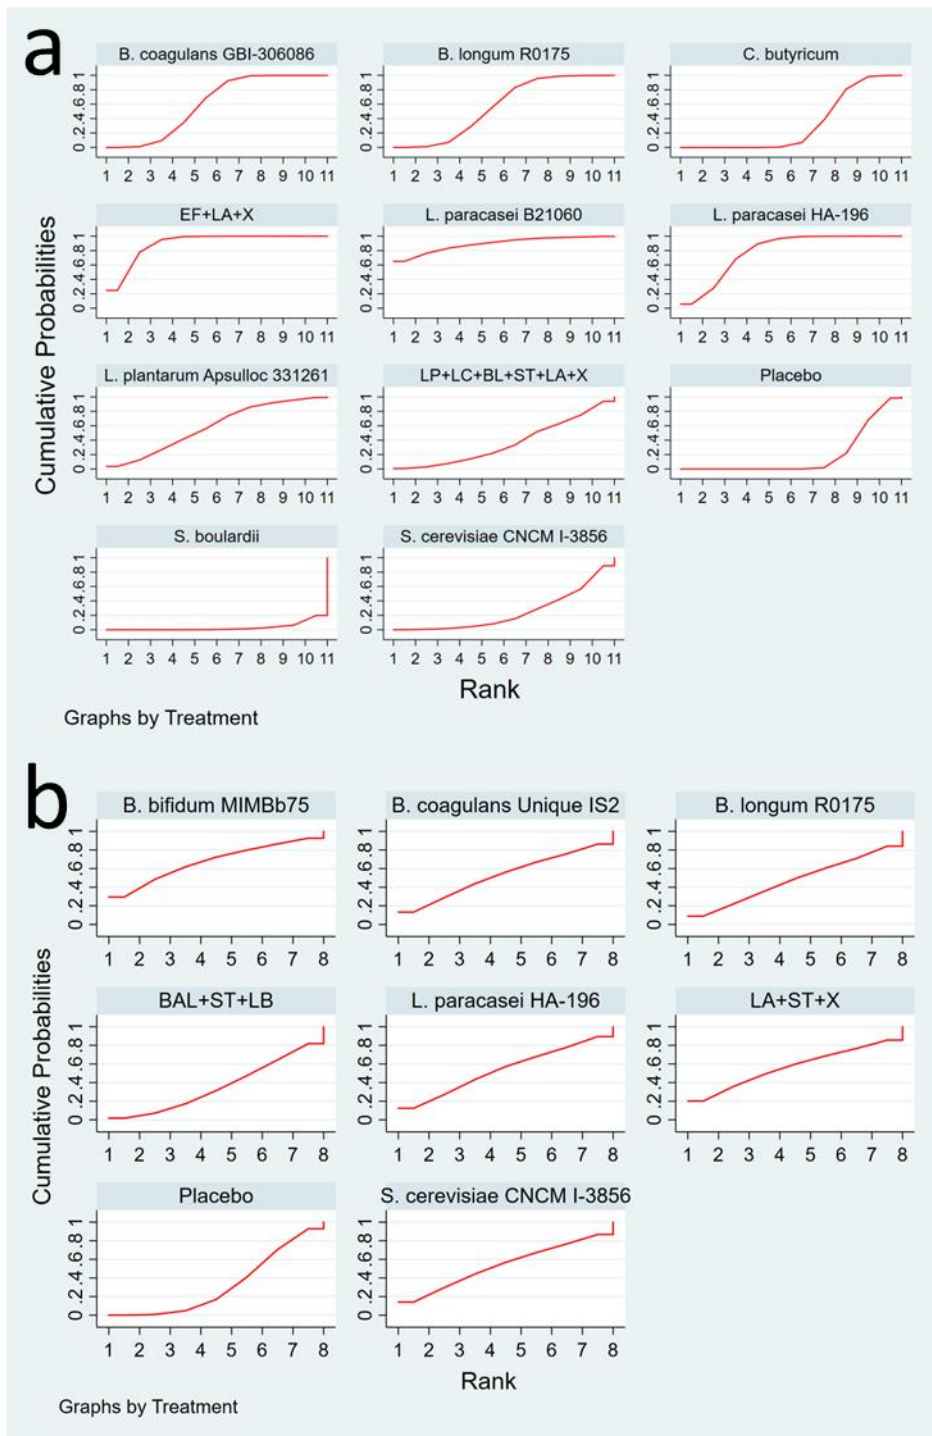

7. Bristol stool form scale in IBS-D (a) and IBS-C (b)

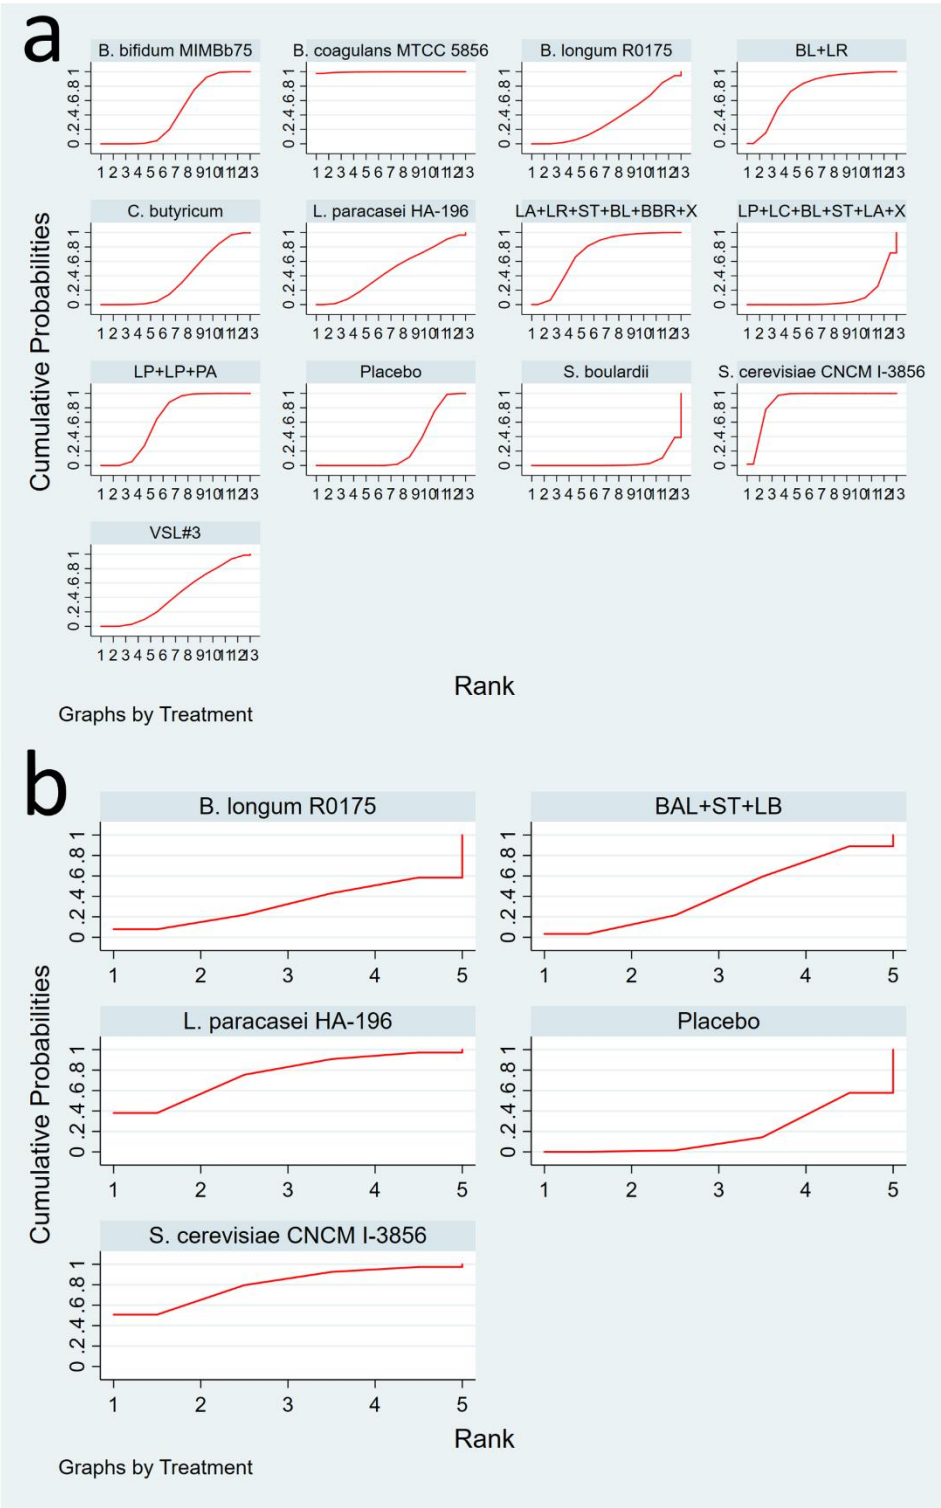

**Figure S5. Predictive interval plots for each pair of interventions.**

Effects were calculated as standardized mean difference and 95% confidence intervals (CI, black horizontal lines); red extensions represent predictive intervals (PrI). IBS-SSS, IBS Symptom Severity Scale; IBS-QOL, IBS-Quality of Life Measure; HADS, the Hospital Anxiety and Depression Scale.

## 1. IBS-SSS

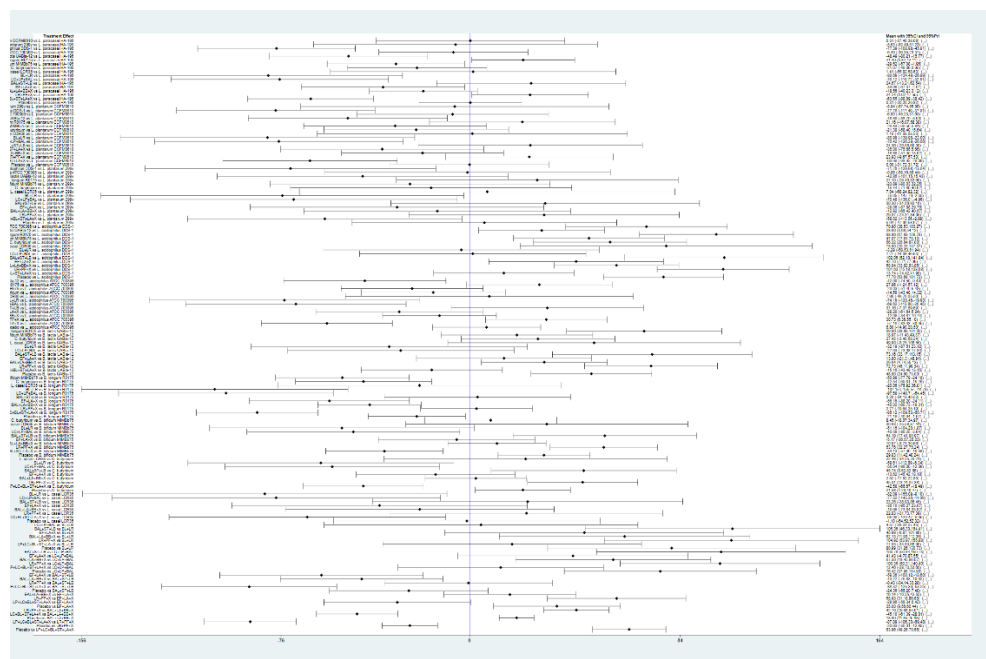

## 2. IBS-QOL

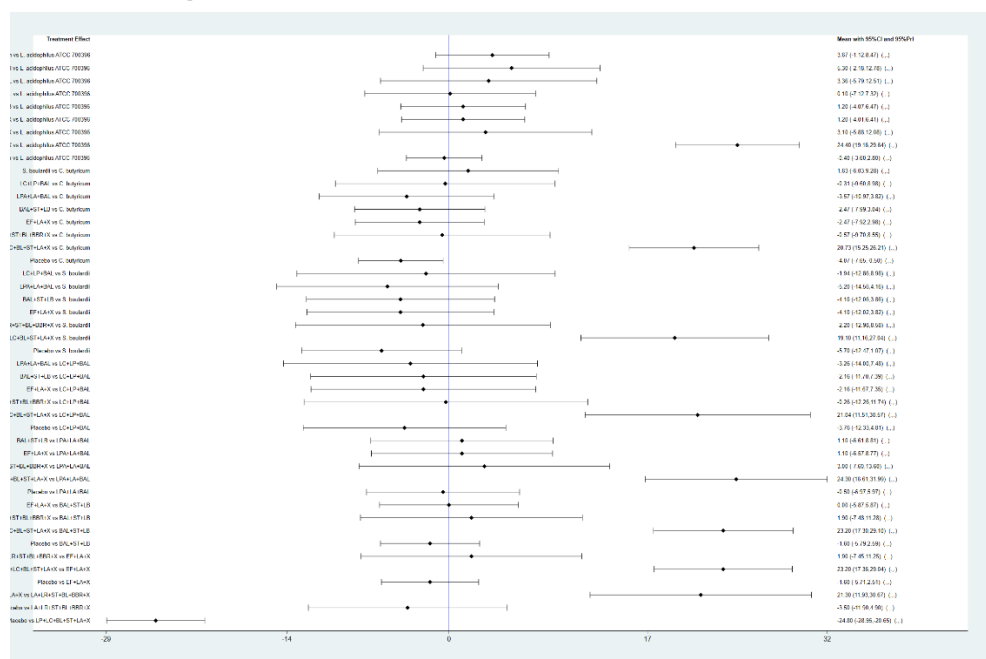

### 3. HADS-total score (a), HADS-anxiety (b), and HADS-depression (c)

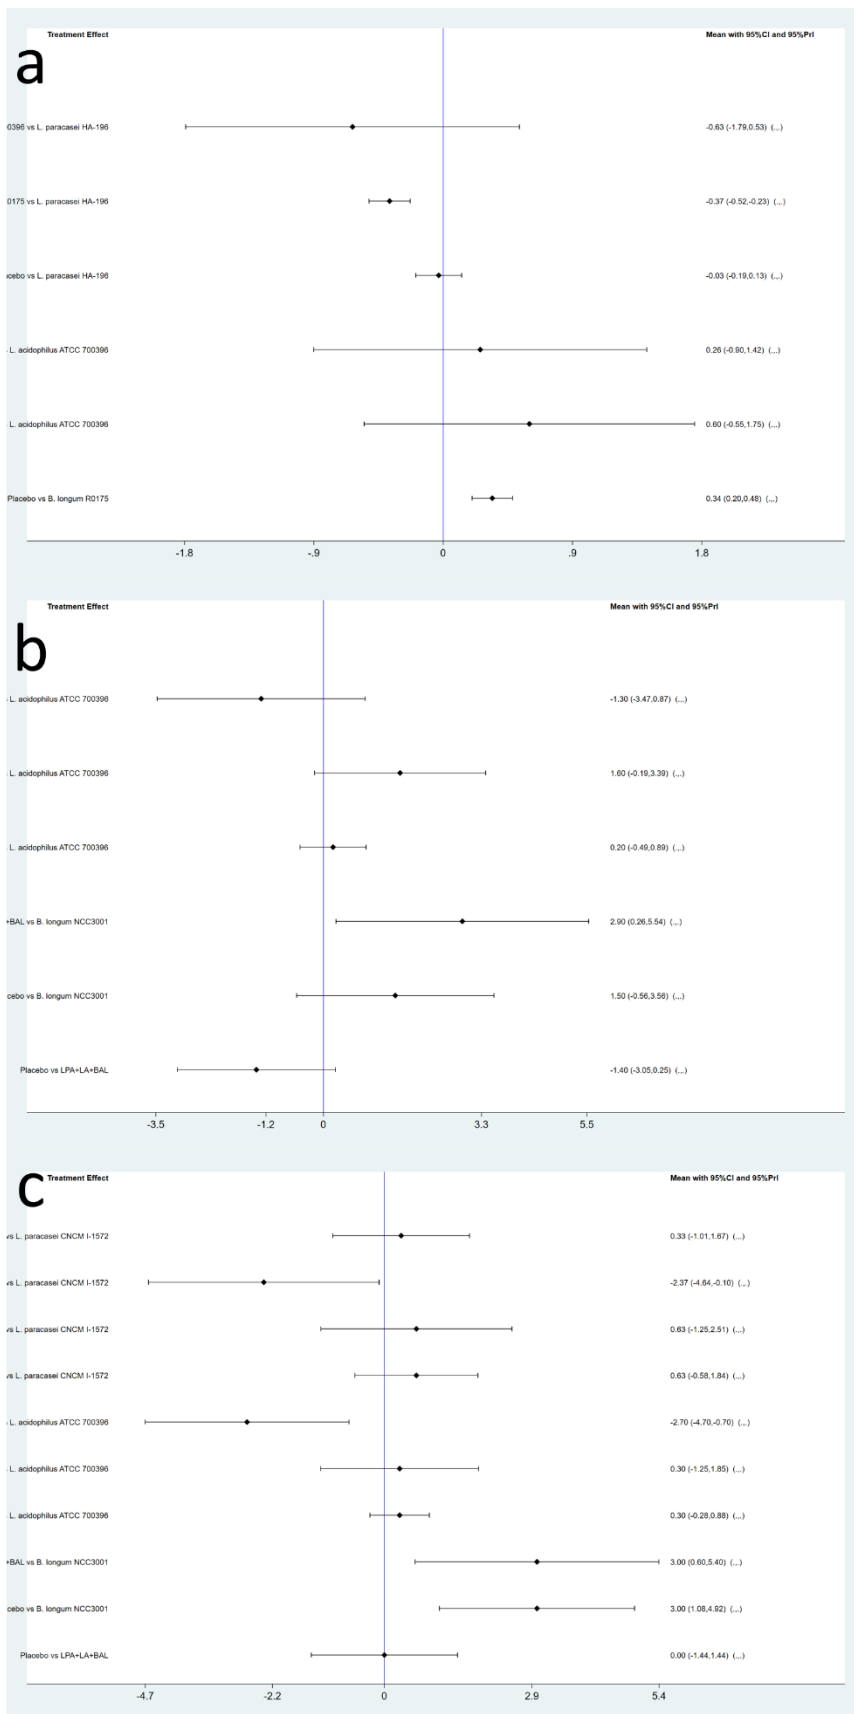

#### 4. Abdominal pain score

[illegible]

9

## 6. Bowel movement frequency (per week) in IBS-D (a) and IBS-C (b).

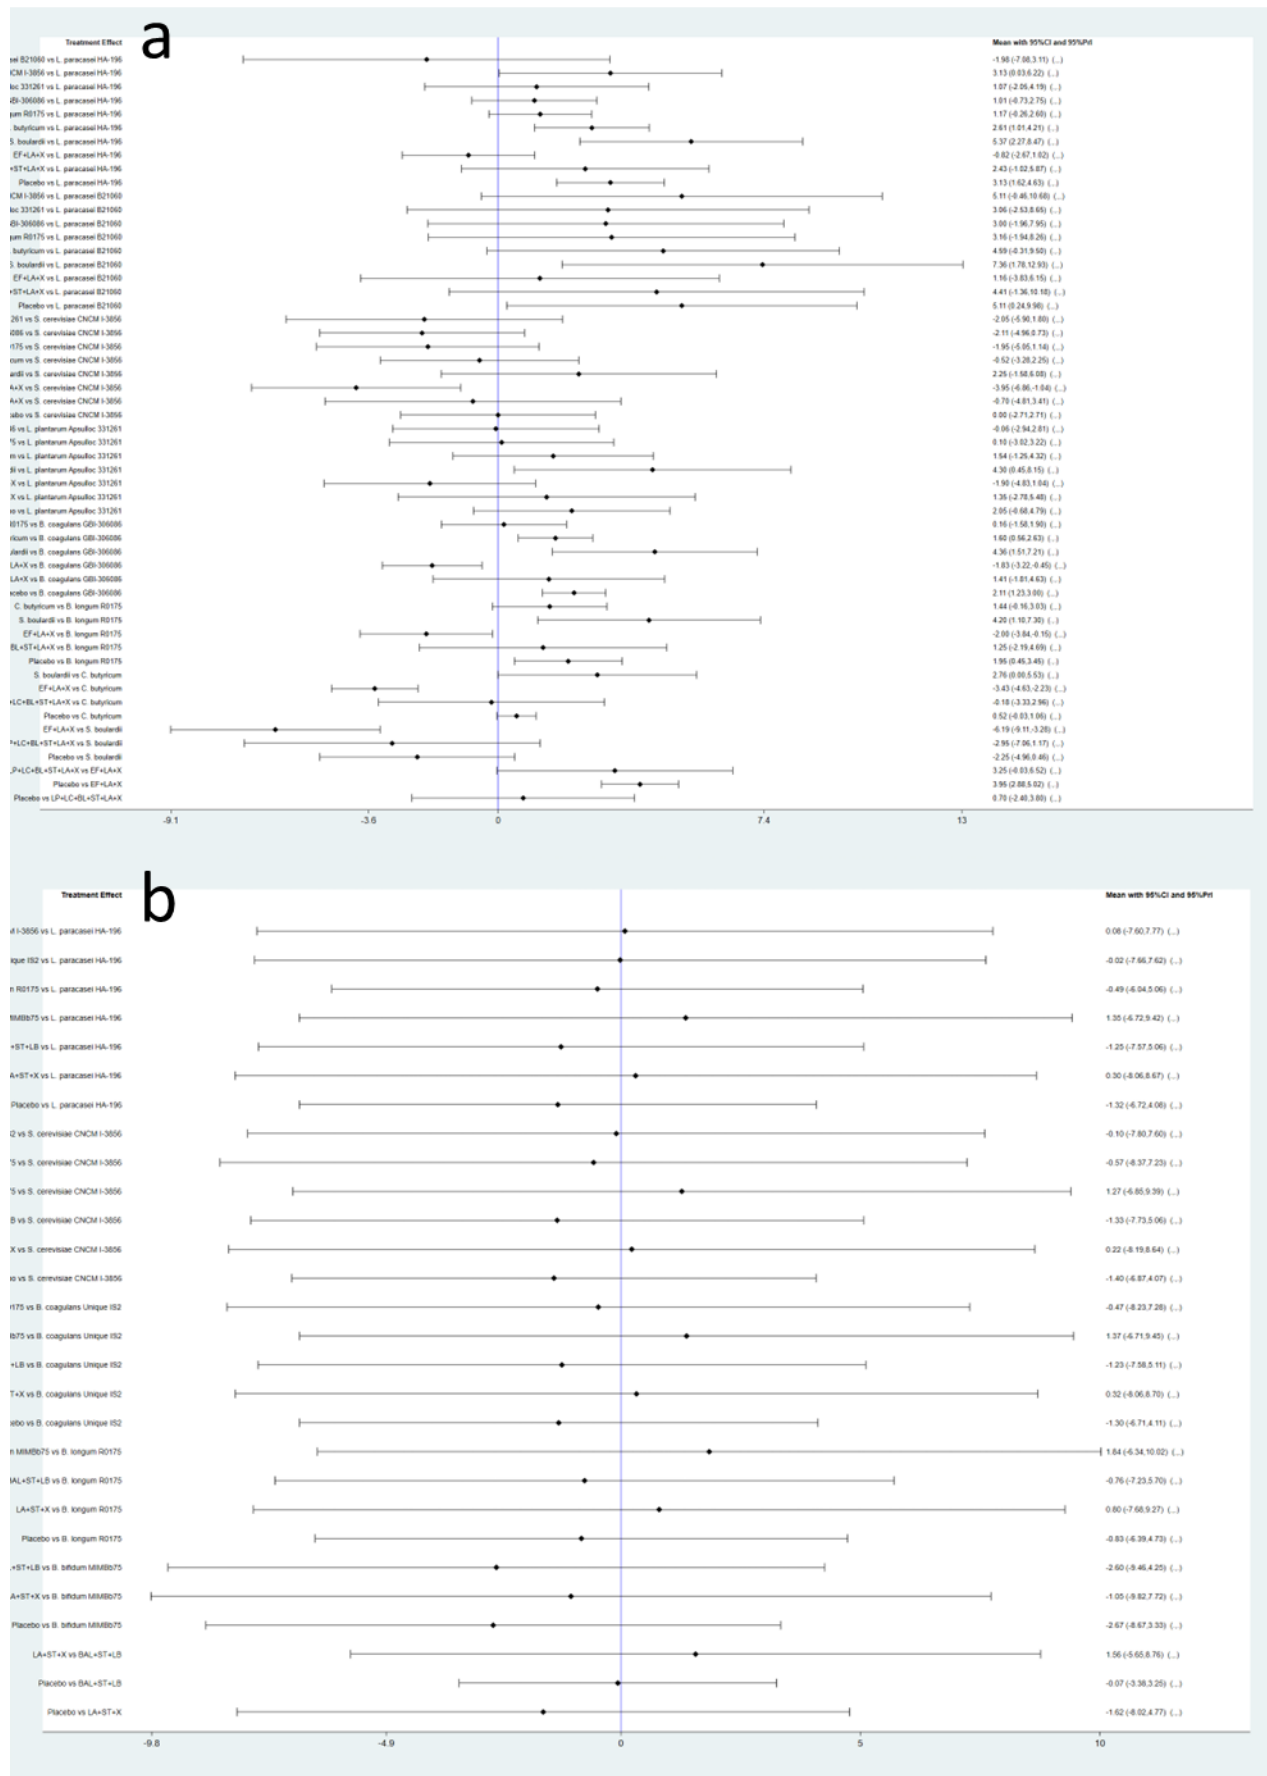

## 7. Bristol stool form scale in IBS-D (a) and IBS-C (b)

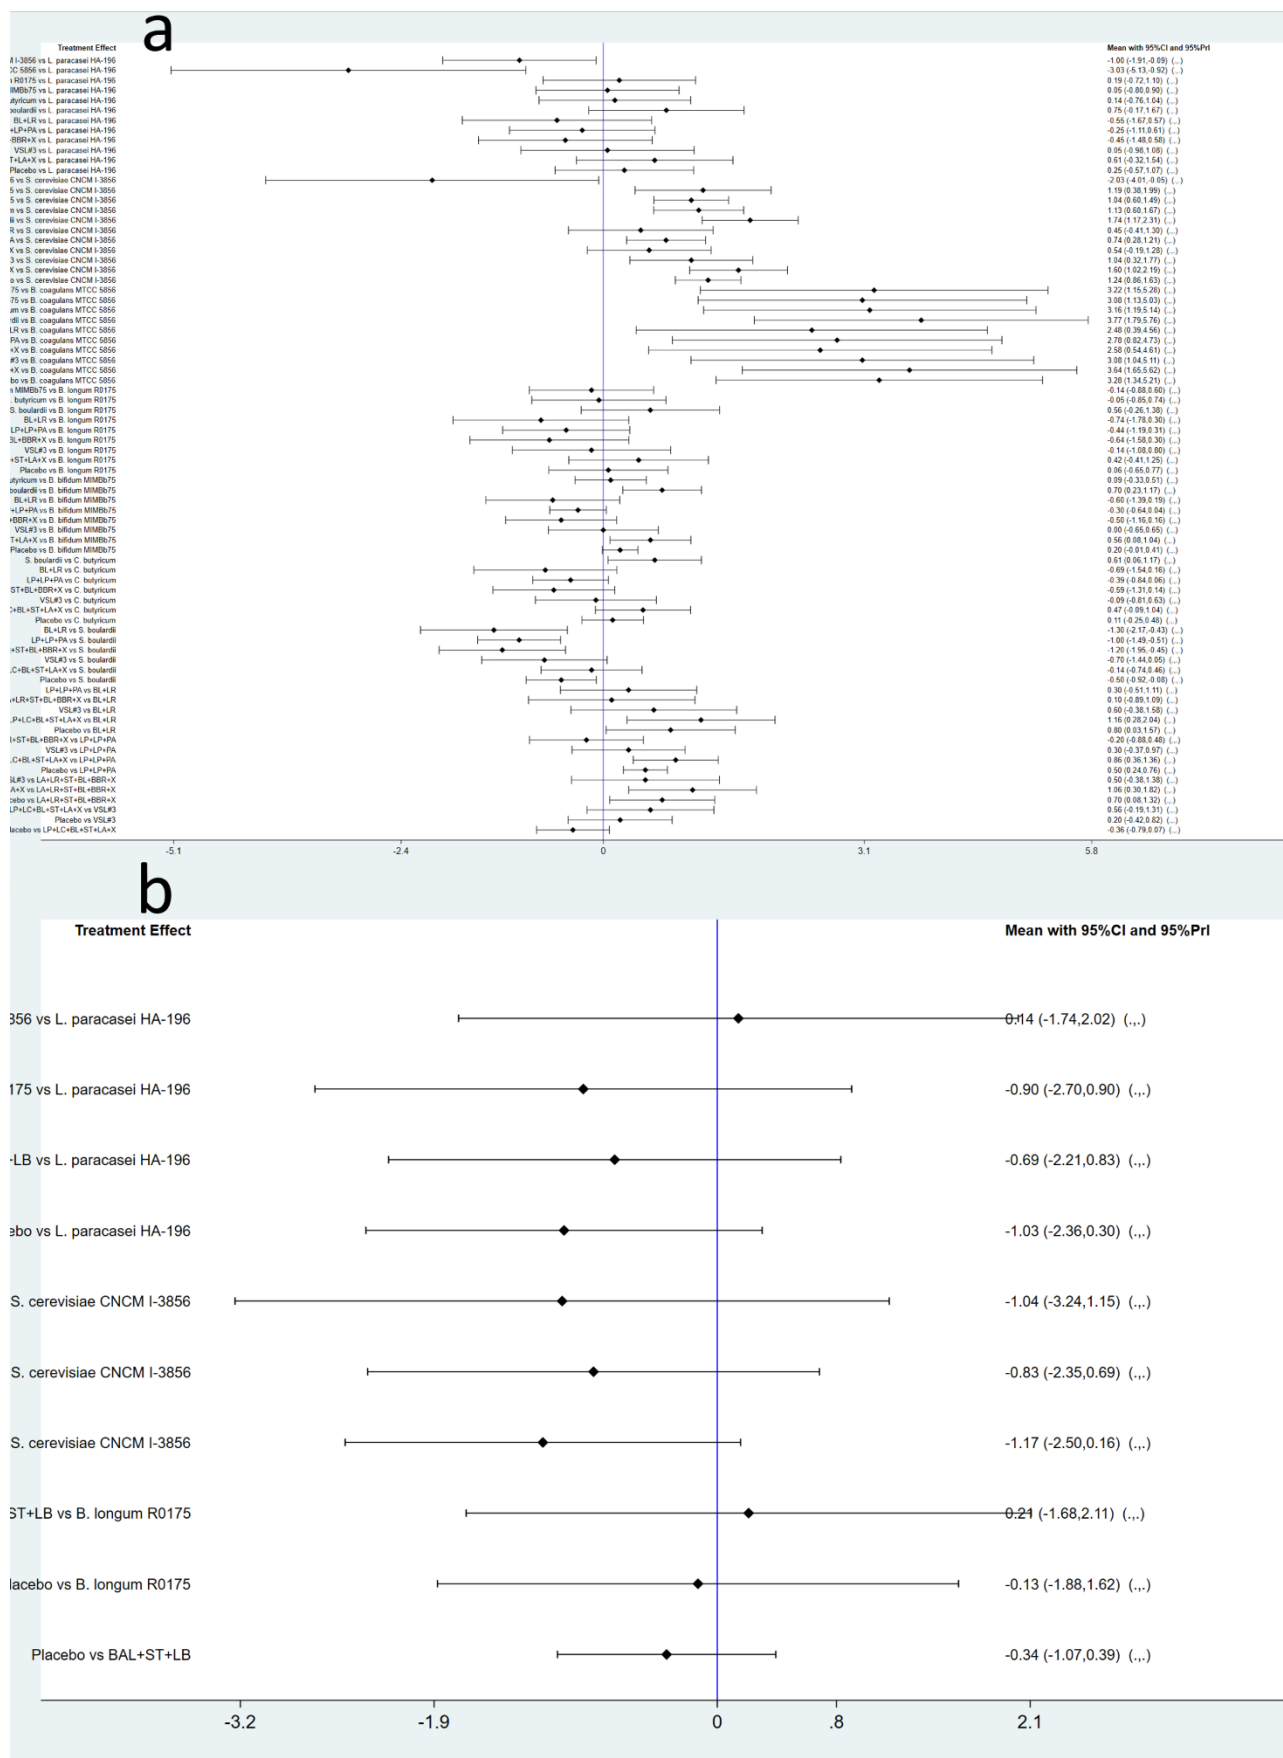

**Figure S6. Funnel plots for each outcome**

IBS-SSS, IBS Symptom Severity Scale; IBS-QOL, IBS-Quality of Life Measure; HADS, the Hospital Anxiety and Depression Scale.

## 1. IBS-SSS

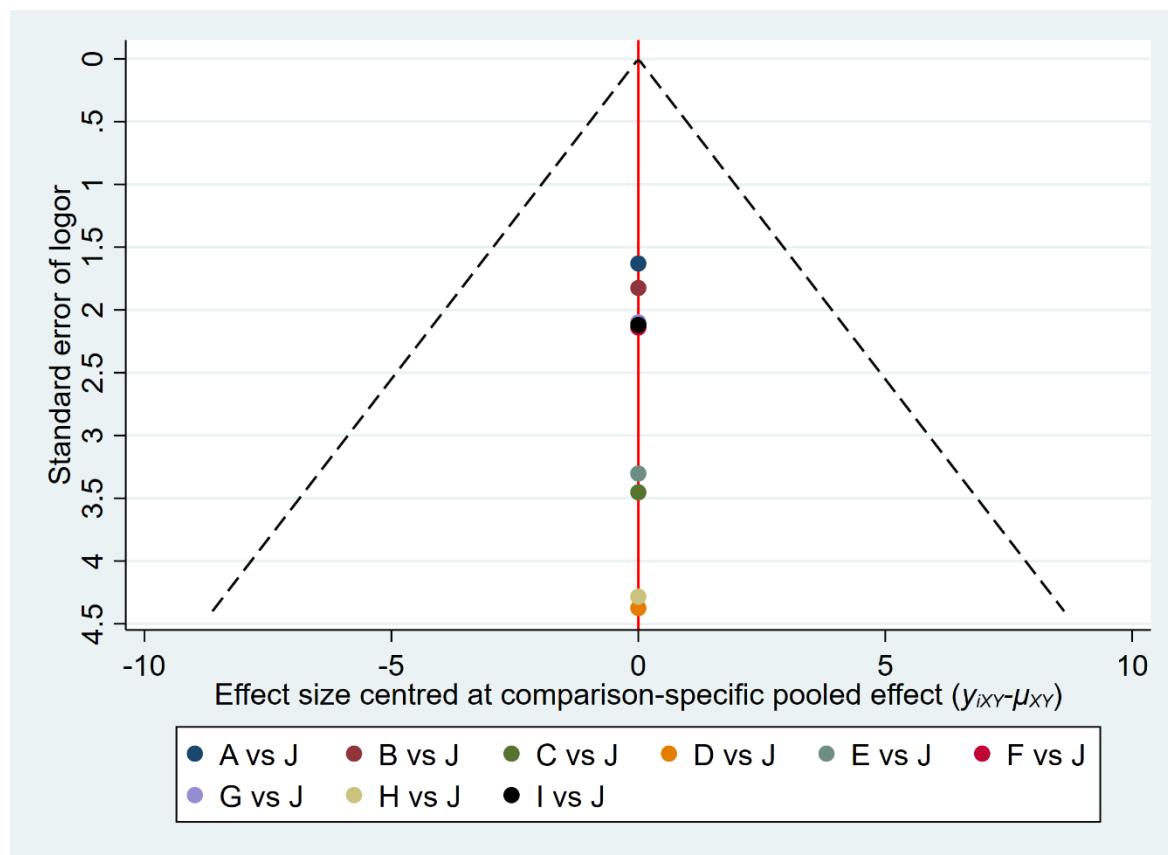

## 2. IBS-QOL

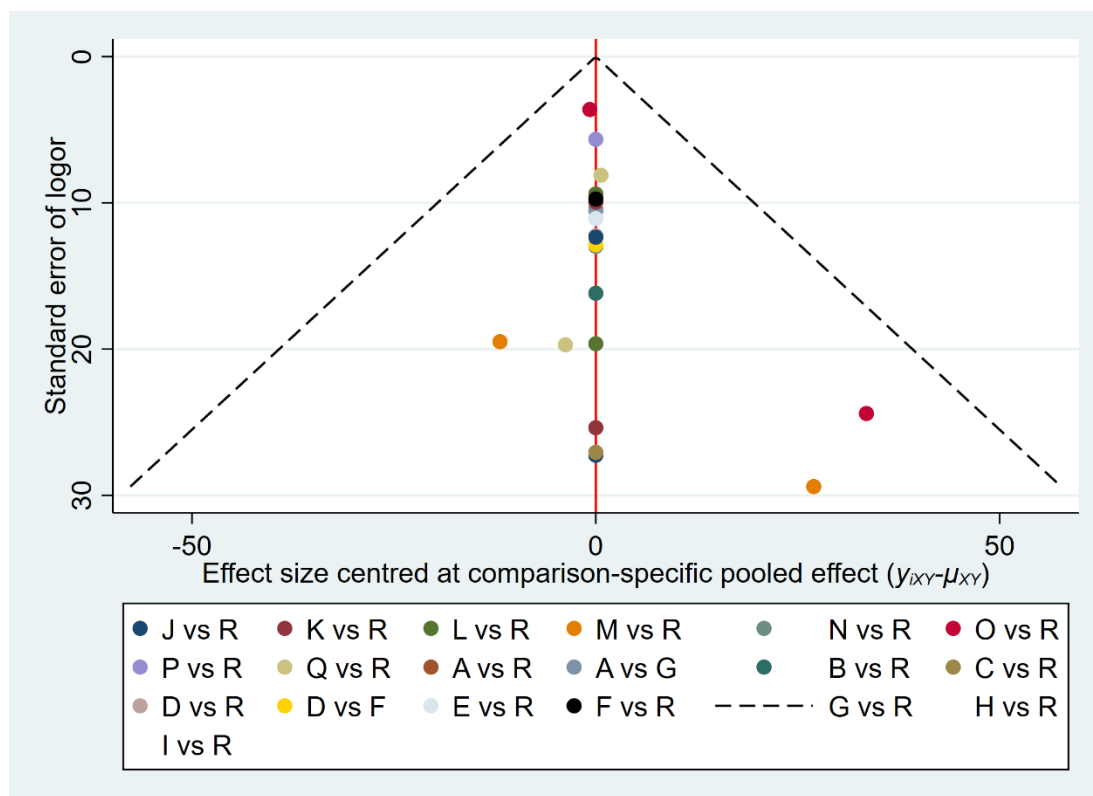

### 3. Abdominal pain score

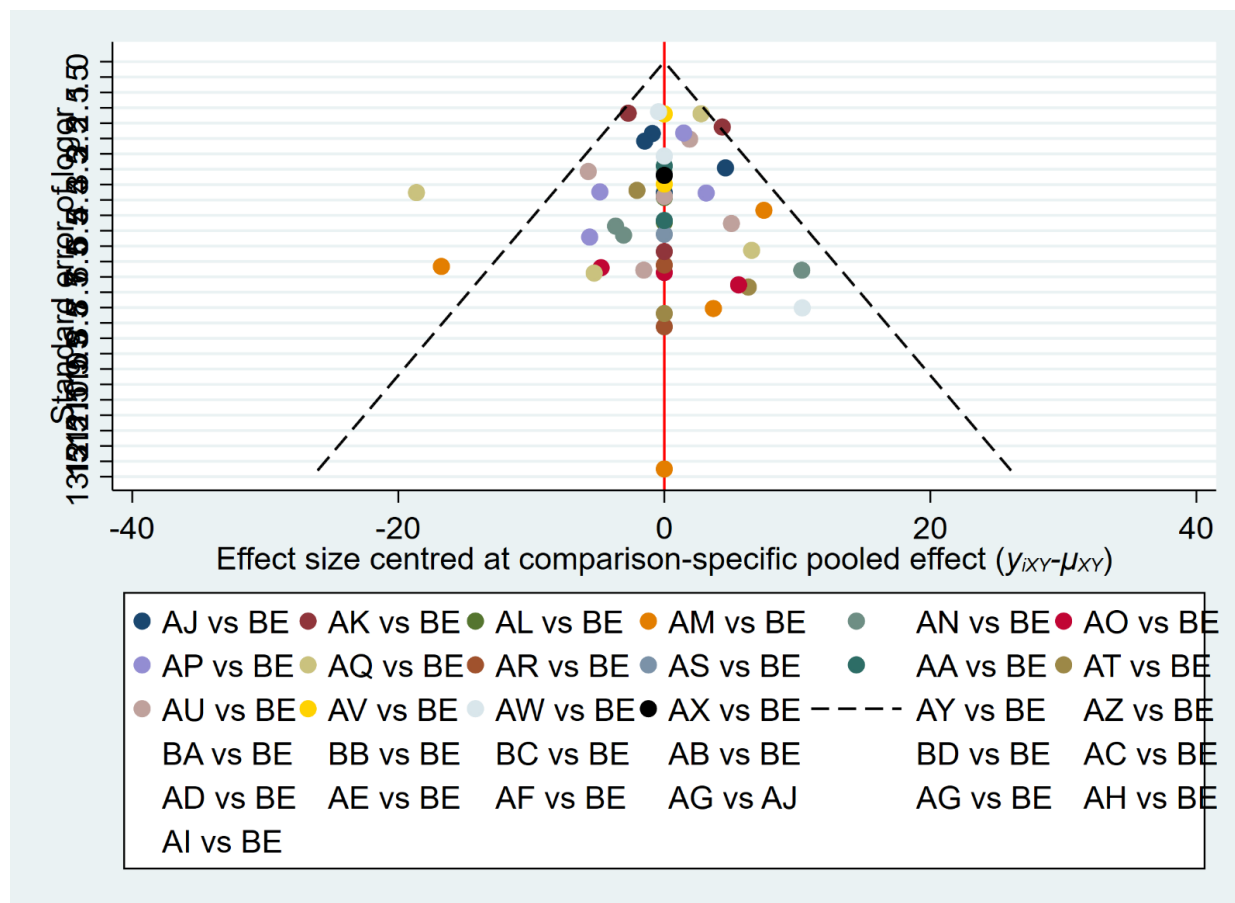

### 4. Abdominal bloating score

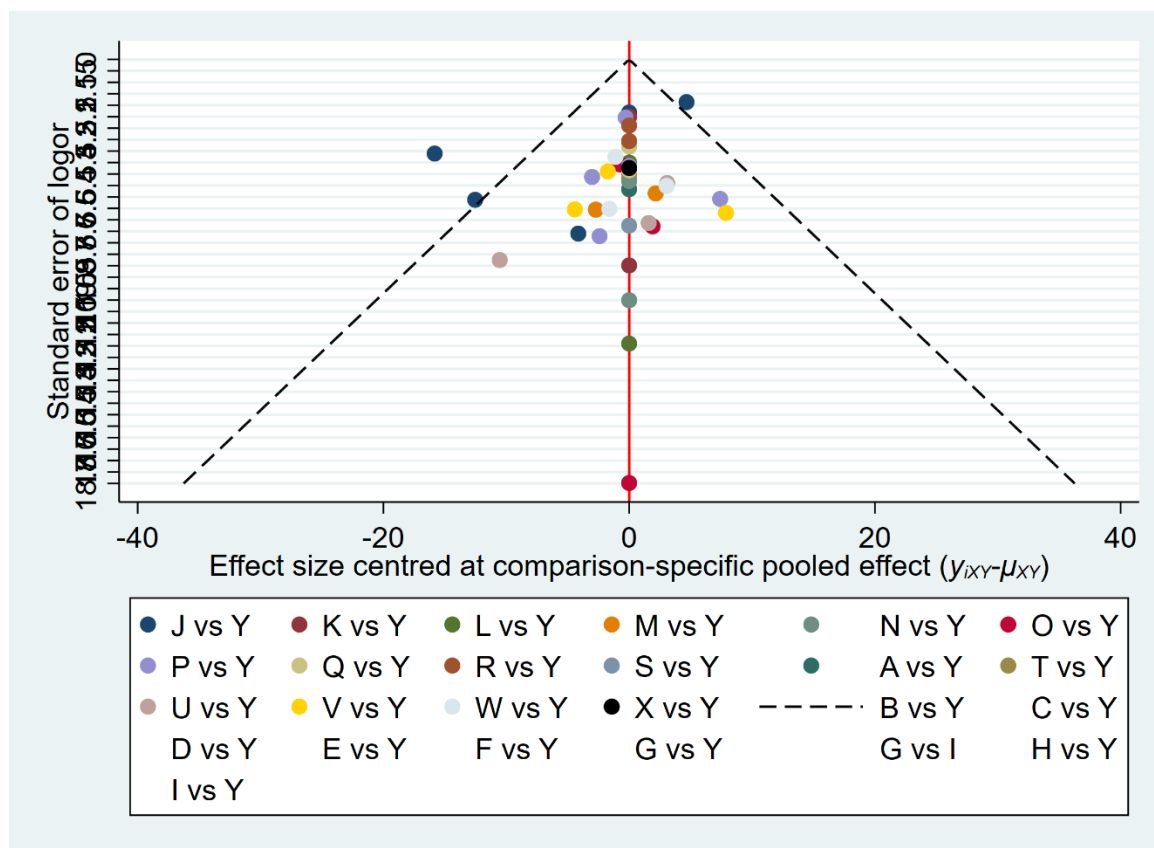

## 5. Bowel movement frequency in IBS-D (a) and IBS-C (b)

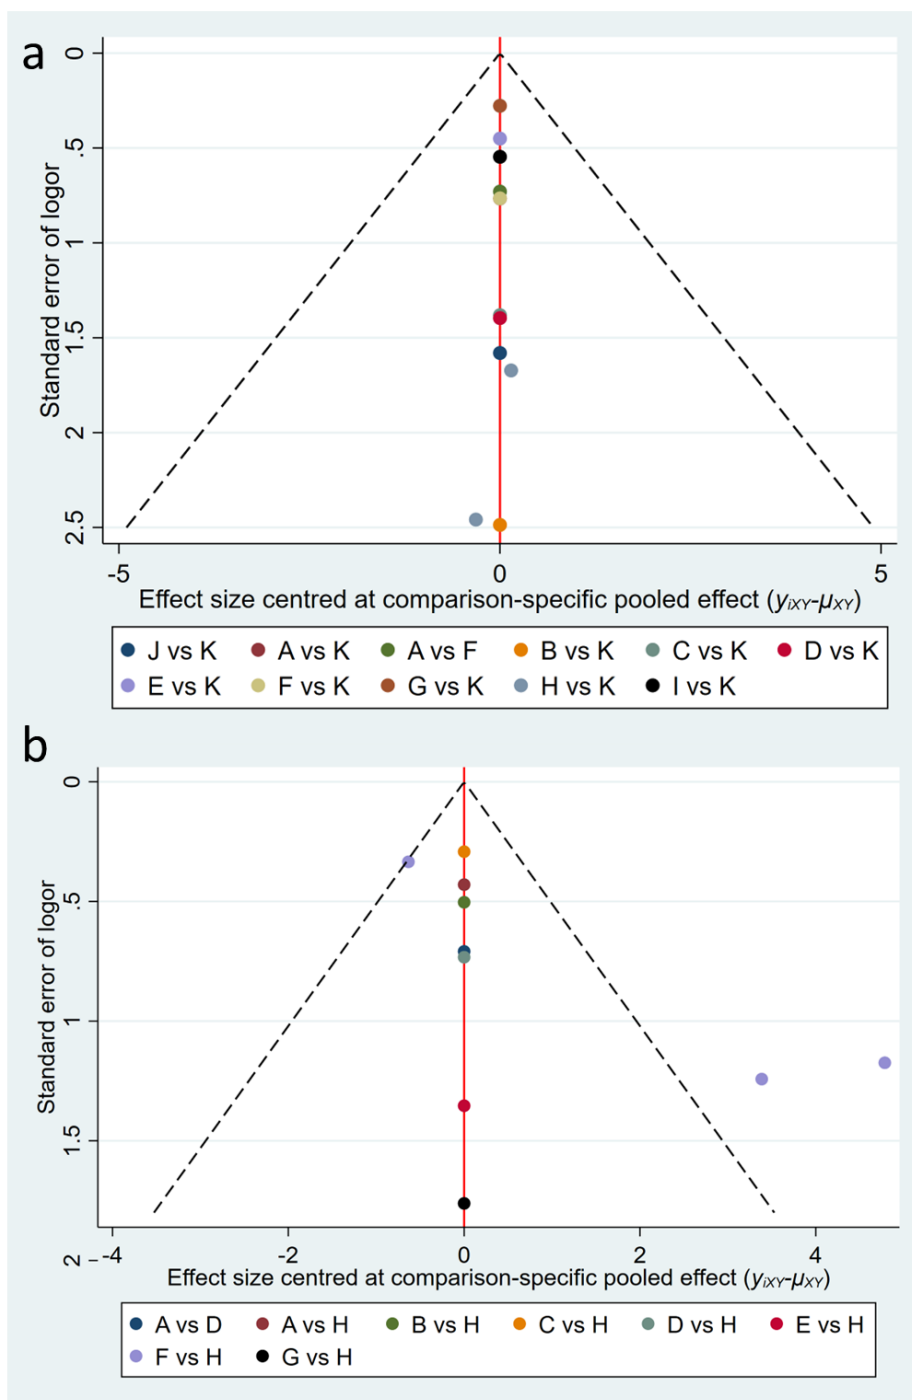

6. Bristol stool form scale IBS-D (a) and IBS-C (b)

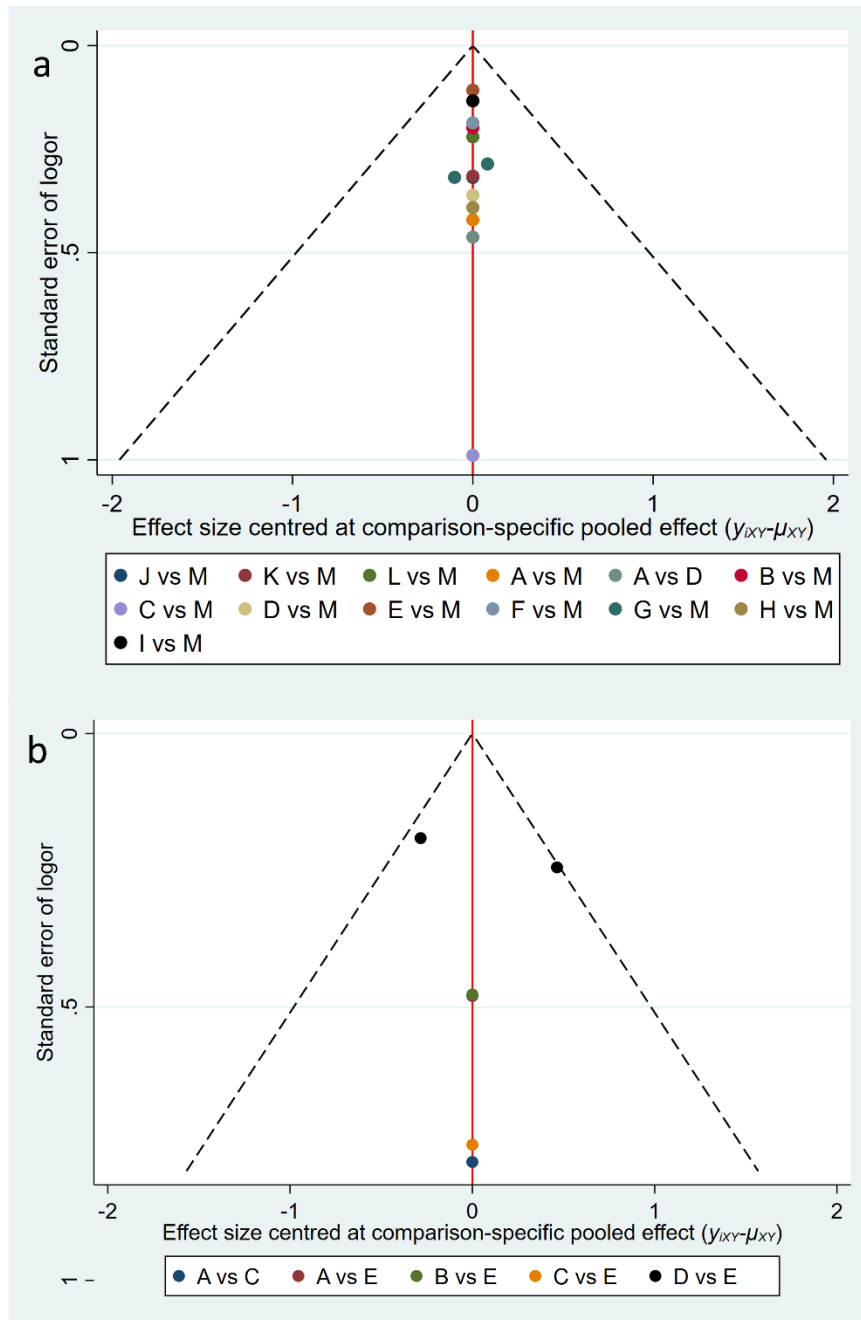

**Table S1. Characteristics of Included Randomized Controlled Trials (1).**

| Study and Publication years | Location    | Diagnostic Criteria        | IBS Subtype | Interventi-<br>on time |                                              | Dose (CFU/day)                    | Sample size (I) | Sample size(C) |
|-----------------------------|-------------|----------------------------|-------------|------------------------|----------------------------------------------|-----------------------------------|-----------------|----------------|
|                             |             |                            |             | (W)                    | Probiotic used                               |                                   |                 |                |
| Bai, 2022                   | China       | Rome IV                    | D           | 4                      | a multi-strain preparation (4)               | $1.395 \times 10^7$               | 145             | 145            |
| Mourey, 2022                | France      | Rome IV                    | C           | 8                      | <i>S. cerevisiae</i> I-3856                  | $8 \times 10^9$                   | 230             | 226            |
| Jung, 2022                  | Korea       | Rome IV                    | D           | 4                      | <i>L. plantarum</i> Apsulloc 331261 (GTB1TM) | $1 \times 10^{10}$                | 18              | 9              |
| Xu, 2021                    | China       | Rome III                   | All         | 4                      | a multi-strain preparation (3)               | $1 \times 10^{10}$                | 24              | 24             |
| Skrzydło-Radomanska, 2021   | Poland      | Rome III                   | D           | 8                      | a multi-strain preparation (10)              | $5 \times 10^9$                   | 25              | 26             |
| Liu, 2021                   | China       | Rome III                   | D           | 8                      | <i>L. plantarum</i> CCFM8610                 | $1 \times 10^{10}$                | 25              | 25             |
| Gupta, 2021                 | India       | Rome IV                    | All         | 80 days                | <i>B. coagulans</i> LBSC (DSM17654)          | $6 \times 10^9$                   | 20              | 20             |
| Barraza-Ortiz, 2021         | Mexico      | Rome IV                    | D, M        | 6                      | a multi-strain preparation (3)               | $3 \times 10^9$                   | 18              | 18             |
| Sadrin, 2020                | France      | Rome III                   | All         | 8                      | a multi-strain preparation (2)               | $1 \times 10^{10}$                | 40              | 40             |
| Martoni, 2020               | India       | Rome IV                    | All         | 6                      | <i>L. acidophilus</i> DDS-1                  | $1 \times 10^{10}$                | 111             | 109            |
|                             |             |                            |             |                        | <i>B. lactis</i> UABla-12                    | $1 \times 10^{10}$                | 110             |                |
| Lewis, 2020                 | Canada      | Rome III                   | All         | 8                      | <i>L. paracasei</i> HA-196                   | $1 \times 10^{10}$                | 95              | 95             |
|                             |             |                            |             |                        | <i>B. longum</i> R0175                       | $1 \times 10^{10}$                | 95              |                |
| Kim, 2020                   | Korea       | Rome II                    | D           | 8                      | a multi-strain preparation (5)               | $1.5 \times 10^{10}$              | 32              | 31             |
| Gayathri, 2020              | India       | Rome III                   | All         | 8                      | <i>S. cerevisiae</i> CNCM I-3856             | $4 \times 10^9$                   | 52              | 48             |
| Bonfrate, 2020              | Italy       | Rome IV                    | All         | 4                      | a multi-strain preparation (2)               | $5 \times 10^9$                   | 15              | 15             |
| Andresen, 2020              | Germany     | Rome III                   | All         | 8                      | <i>B. bifidum</i> MIMBb75 (SYN-HI-001)       | $1 \times 10^9$ bacteria/day      | 221             | 222            |
| Oh, 2019                    | Korea       | Rome III                   | D, M, U     | 4                      | a multi-strain preparation (3)               | $1 \times 10^9$                   | 28              | 27             |
| Madempudi, 2019             | India       | Rome III                   | C           | 8                      | <i>B. coagulans</i> Unique IS2               | $2 \times 10^9$                   | 68              | 68             |
| Ashtiani, 2019              | Iran        | Rome II                    | All         | 4                      | a multi-strain preparation (7)               | $2 \times 10^9$                   | 30              | 30             |
| Sun, 2018                   | China       | Rome III                   | D           | 4                      | <i>C. butyricum</i>                          | $5.67 \times 10^7$                | 105             | 95             |
| Shin, 2018                  | Korea       | Rome III                   | D           | 8                      | <i>L. gasseri</i> BNR17                      | $1 \times 10^{10}$                | 30              | 30             |
| Preston, 2018               | USA         | Rome III                   | All         | 12                     | a multi-strain preparation (3)               | $1 \times 10^{11}$                | 76              | 37             |
| Kim, 2018                   | Korea       | subjective symptoms of IBS | All         | 4                      | <i>L. gasseri</i> BNR17                      | $1 \times 10^{10}$                | 10              | 12             |
| Ishaque, 2018               | Bangladesh  | Rome III                   | D           | 16                     | a multi-strain preparation (14)              | $8 \times 10^9$                   | 181             | 179            |
| Cremon, 2018                | Italy       | Rome III                   | All         | 8                      | <i>L. paracasei</i> CNCM I-1572              | $4.8 \times 10^{10}$ bacteria/day | 20              | 20             |
| Pinto-Sanchez, 2017         | Canada      | Rome III                   | D, M        | 6                      | <i>B. longum</i> NCC3001                     | $1 \times 10^{10}$                | 18              | 20             |
| Nobutani, 2017              | Japan       | Rome III                   | All         | 4                      | <i>L. gasseri</i> CP2305                     | $1.3 \times 10^8$                 | 17              | 17             |
| Hod, 2017                   | Israel      | Rome III                   | D           | 8                      | a multi-strain preparation (11)              | $2.5 \times 10^{10}$              | 54              | 53             |
| Thijssen, 2016              | Netherlands | Rome II                    | All         | 8                      | <i>L. casei</i> Shirota                      | $1.3 \times 10^{10}$              | 39              | 41             |
| Spiller, 2016               | France      | Rome III                   | All         | 12                     | <i>S. cerevisiae</i> CNCM I-3856             | $8 \times 10^9$                   | 192             | 187            |
| Mezzasalma, 2016            | Italy       | Rome III                   | C           | 60 days                | a multi-strain preparation (2)               | $4 \times 10^9$                   | 53              | 52             |
|                             |             |                            |             |                        | a multi-strain preparation (3)               | $6 \times 10^9$                   | 52              |                |
| Majeed, 2016                | India       | Rome III                   | D           | 90 days                | <i>B. coagulans</i> MTCC 5856                | $2 \times 10^9$                   | 18              | 18             |

|                      |                |                       |      |    |                                          |                          |     |     |
|----------------------|----------------|-----------------------|------|----|------------------------------------------|--------------------------|-----|-----|
|                      |                |                       |      |    |                                          | spore/day                |     |     |
| Lyra, 2016           | Finland        | Rome III              | All  | 12 | <i>L. acidophilus</i> NCFM (ATCC 700396) | $1 \times 10^9$          | 129 | 131 |
| Yoon, 2015           | Korea          | Rome III              | All  | 4  | a multi-strain preparation (6)           | $1 \times 10^{10}$       | 39  | 42  |
|                      |                |                       |      |    |                                          | bacteria/day             |     |     |
| Wong, 2015           | Singapore      | Rome III              | All  | 6  | a multi-strain preparation (8)           | $9 \times 10^{11}$       | 20  | 22  |
|                      |                |                       |      |    |                                          | bacteria/day             |     |     |
| de Chambrun, 2015    | France         | Rome III              | All  | 8  | <i>S. cerevisiae</i> CNCM I-3856         | $4 \times 10^9$          | 93  | 86  |
| Yoon, 2014           | Korea          | Rome III              | All  | 4  | a multi-strain preparation (6)           | $1 \times 10^{10}$       | 25  | 24  |
|                      |                |                       |      |    |                                          | viable cells             |     |     |
| Stevenson, 2014      | South Africa   | Rome II               | All  | 8  | <i>L. plantarum</i> 299V                 | $10 \times 10^9$         | 54  | 27  |
| Sisson, 2014         | UK             | Rome III              | All  | 12 | a multi-strain preparation (4)           | $2 \times 10^8/(KG*day)$ | 124 | 62  |
| Shavakhi, 2014       | Iran           | Rome III              | All  | 2  | a multi-strain preparation (7)           | $2 \times 10^8$          | 66  | 63  |
| Ludidi, 2014         | Netherlands    | Rome III              | All  | 6  | a multi-strain preparation (6)           | $5 \times 10^9$          | 21  | 19  |
| Lorenzo-Zuniga, 2014 | Spain          | Rome III              | D    | 6  | a multi-strain preparation (3)           | $3-6 \times 10^9$        | 55  | 29  |
| Jafari, 2014         | Iran           | Rome III              | All  | 4  | a multi-strain preparation (4)           | $8 \times 10^9$          | 54  | 54  |
| Abbas, 2014          | Pakistan       | Rome III              | D    | 6  | <i>S. boulardii</i>                      | NA                       | 37  | 35  |
| Roberts, 2013        | UK             | Rome III              | C, M | 12 | a multi-strain preparation (4)           | $2.74 \times 10^{10}$    | 88  | 91  |
| Lee, 2013            | Korea          | Rome III              | All  | 6  | a multi-strain preparation (5)           | $2.6 \times 10^{10}$     | 46  | 39  |
| Charbonneau, 2013    | Ireland        | Rome II               | All  | 8  | <i>B. infantis</i> 35624                 | $1 \times 10^9$          | 39  | 37  |
| Cappello, 2013       | Italy          | Rome III              | All  | 4  | a multi-strain preparation (9)           | $3.8 \times 10^{10}$     | 34  | 34  |
| Begtrup, 2013        | Denmark        | Rome III              | All  | 24 | a multi-strain preparation (3)           | $5.2 \times 10^{10}$     | 67  | 64  |
| Amirimani, 2013      | Iran           | Rome III              | All  | 4  | <i>L. reuteri</i>                        | $1 \times 10^8$          | 41  | 31  |
| Kruis, 2012          | Germany        | Rome II               | All  | 12 | <i>E. coli</i> Nissle 1917               | $5-50 \times 10^9$       | 60  | 60  |
| Ducrotte, 2012       | India          | Rome III              | All  | 4  | <i>L. plantarum</i> 299v (DSM 9843)      | $1 \times 10^{10}$       | 108 | 106 |
| Dapoigny, 2012       | France         | Rome III              | All  | 4  | <i>L. casei rhamnosus</i> LCR35          | $6 \times 10^8$          | 26  | 26  |
| Cui, 2012            | China          | Rome III              | All  | 4  | a multi-strain preparation (2)           | NA                       | 37  | 23  |
| Cha, 2012            | Korea          | Rome III              | D    | 8  | a multi-strain preparation (7)           | $1 \times 10^{10}$       | 25  | 25  |
|                      |                |                       |      |    |                                          | cells/day                |     |     |
| Sondergaard, 2011    | Danish, Sweden | Rome II               | All  | 8  | a multi-strain preparation (5)           | $7.5 \times 10^{10}$     | 32  | 25  |
| Michail, 2011        | USA            | Rome III              | D    | 24 | a multi-strain preparation (8)           | $9 \times 10^{11}$       | 15  | 9   |
|                      |                |                       |      |    |                                          | bacteria/day             |     |     |
| Guglielmetti, 2011   | Germany        | Rome III              | All  | 4  | <i>B. bifidum</i> MIMBb75                | $1 \times 10^9$          | 60  | 62  |
| Choi, 2011           | Korea          | Rome II               | D, M | 4  | <i>S. boulardii</i>                      | $8 \times 10^{11}$       | 45  | 45  |
|                      |                |                       |      |    |                                          | bacteria/day             |     |     |
| Simren, 2010         | Sweden         | Rome II               | All  | 8  | a multi-strain preparation (3)           | $2 \times 10^{10}$       | 37  | 37  |
| Ligaarden, 2010      | Norway         | Rome II               | All  | 3  | <i>L. plantarum</i> MF1298               | $1 \times 10^{10}$       | 10  | 9   |
| Hun, 2009            | USA            | Rome II               | D    | 8  | <i>B. coagulans</i> GBI-30, 6086         | $8 \times 10^8$          | 22  | 22  |
| Hong, 2009           | Korea          | Rome III              | All  | 8  | a multi-strain preparation (4)           | $4 \times 10^{10}$       | 36  | 34  |
| Enck, 2009           | Germany        | primary care criteria | All  | 8  | <i>E. coli</i> (DSM 17252)               | $6.75-13.5 \times 10^7$  | 148 | 150 |
| Dolin, 2009          | USA            | Rome III              | D    | 8  | <i>B. coagulans</i> GBI-30, 6086         | $2.0 \times 10^9$        | 26  | 29  |
| Zeng, 2008           | China          | Rome II               | D    | 4  | a multi-strain preparation (4)           | $5.2 \times 10^{10}$     | 14  | 15  |
| Williams, 2008       | UK             | Rome II               | All  | 8  | a multi-strain preparation (4)           | $2.5 \times 10^{10}$     | 28  | 28  |

|                             |         |                          |     |    |                                       |                       |     |     |
|-----------------------------|---------|--------------------------|-----|----|---------------------------------------|-----------------------|-----|-----|
| Sinn, 2008                  | Korea   | Rome III                 | All | 4  | <i>L. acidophilus</i> -SDC 2012, 2013 | $2.9 \times 10^9$     | 20  | 20  |
| Kajander, 2008              | Finland | Rome II                  | All | 20 | a multi-strain preparation (4)        | $1.2 \times 10^9$     | 43  | 43  |
| Enck, 2008                  | Germany | primary care<br>criteria | All | 8  | a multi-strain preparation (2)        | $9.27 \times 10^7$    | 149 | 148 |
| Drouault-<br>Holowacz, 2008 | France  | Rome II                  | All | 4  | a multi-strain preparation (3)        | $1 \times 10^{10}$    | 53  | 53  |
| Andriulli, 2008             | Italy   | Rome II                  | All | 12 | <i>L. paracasei</i> strain B21060     | $1 \times 10^{10}$    | 132 | 135 |
| Agrawal, 2008               | France  | Rome III                 | C   | 4  | a multi-strain preparation (3)        | $2.74 \times 10^{10}$ | 17  | 17  |
| Guyonnet, 2007              | France  | Rome II                  | C   | 6  | a multi-strain preparation (3)        | $2.74 \times 10^{10}$ | 137 | 137 |
| Whorwell, 2006              | UK      | Rome II                  | All | 4  | <i>B. infantis</i> 35624              | $1 \times 10^{10}$    | 90  | 92  |
| O'Mahony, 2005              | Ireland | Rome II                  | All | 8  | a multi-strain preparation (2)        | $1 \times 10^{10}$    | 50  | 25  |
|                             |         |                          |     |    |                                       | bacteria/day          |     |     |
| Niv, 2005                   | Israel  | Rome II                  | All | 22 | <i>L. reuteri</i> ATCC 55730          | $2 \times 10^8$       | 27  | 27  |
| Kim, 2005                   | USA     | Rome II                  | All | 4  | a multi-strain preparation (8)        | $4.5 \times 10^{11}$  | 24  | 24  |
|                             |         |                          |     |    |                                       | bacteria/day          |     |     |
| Kajander, 2005              | Finland | Rome I                   | All | 24 | a multi-strain preparation (4)        | $8.9 \times 10^9$     | 52  | 51  |
| Kim, 2003                   | USA     | Rome II                  | D   | 8  | a multi-strain preparation (8)        | $4.5 \times 10^{11}$  | 12  | 13  |
| Niedzielin, 2001            | Poland  | Manning<br>criteria      | All | 4  | <i>L. plantarum</i> 299V              | $2 \times 10^{10}$    | 20  | 20  |
| Nobaek, 2000                | USA     | Rome I                   | All | 4  | <i>L. plantarum</i> DSM 9843          | $5 \times 10^7$       | 30  | 30  |

IBS subtype: D, IBS with predominant diarrhea; C, IBS with predominant constipation. W, week; CFU, colony-forming unit; I, intervention group; C, control group.

*Lactobacillus paracasei*, *L. paracasei*; *Saccharomyces cerevisiae*, *S. cerevisiae*; *Lactiplantibacillus plantarum* (*Lactobacillus plantarum*), *L. plantarum*; *Bacillus coagulans*, *B. coagulans*; *Lactobacillus acidophilus*, *L. acidophilus*; *Bifidobacterium animalis* subsp. *lactis*, *B. lactis*; *Bifidobacterium longum*, *B. longum*; *Bifidobacterium bifidum*, *B. bifidum*; *Clostridium butyricum*, *C. butyricum*; *Lactobacillus gasseri*, *L. gasseri*; *Bacillus clausii*, *B. clausii*; *Lactobacillus rhamnosus*, *L. rhamnosus*; *Bifidobacterium infantis*, *B. infantis*; *Lactobacillus casei*, *L. casei*; *Saccharomyces boulardii*, *S. boulardii*; *Escherichia coli*, *E. coli*; *Lactobacillus reuteri*, *L. reuteri*.

**Table S2. Characteristics of Included Randomized Controlled Trials (2)**

| Authors                 | Public-<br>ation<br>years | Sample<br>size (I) | No. of<br>female | Age               | BMI              | Sample<br>size(C) | No. of<br>female | Age               | BMI               |
|-------------------------|---------------------------|--------------------|------------------|-------------------|------------------|-------------------|------------------|-------------------|-------------------|
| Bai                     | 2023                      | 145                | 70               | 42.41 (11.92)     | 23.10 (3.14)     | 145               | 60               | 45.74 (12.40)     | 23.69 (2.75)      |
| Mourey                  | 2022                      | 230                | 202              | 41.2 ± 13.96      | NA               | 226               | 190              | 39.9 ± 14.56      | NA                |
| Jung                    | 2022                      | 18                 | 12               | 39.84 (6.44)      | 24.00 (3.44)     | 9                 | 6                | 39.38 (3.16)      | 24.40 (3.84)      |
| Xu                      | 2021                      | 24                 | 14               | 35.58±13.28       | NA               | 24                | 11               | 38.29±15.84       | NA                |
| Skrzydło-<br>Radomanska | 2021                      | 25                 | 17               | 45.5 ± 11.1       | 26.5 ± 4.7       | 26                | 14               | 40.7 ± 14.4       | 25.2 ± 4.2        |
| Liu                     | 2021                      | 25                 | 9                | 48.57 ± 11.14     | 25.14 ± 4.14     | 25                | 11               | 48.95 ± 9.38      | 25.42 ± 4.50      |
| Gupta                   | 2021                      | 20                 | 7                | 36.20±9.81        | 23.37±3.23       | 20                | 5                | 34.80±11.06       | 24.03±2.99        |
| Barraza-Ortiz           | 2021                      | 18                 | 12               | 45.1±9.2          | 26.8±5.2         | 18                | 10               | 46.1±5.2          | 24.6±3.4          |
| Sadrin                  | 2020                      | 40                 | 29               | 48.9 ± 8.4        | NA               | 40                | 28               | 48.9 ± 8.0        | NA                |
| Martoni                 | 2020                      | 111                | 58               | 39.41 (11.80)     | 24.09 (4.34)     | 109               | 54               | 37.61 (10.12)     | 24.10 (4.06)      |
|                         |                           | 110                | 51               | 41.60 (11.11)     | 23.78 (3.98)     |                   |                  | NA                | NA                |
| Lewis                   | 2020                      | 95                 | 67               | 42.42 ± 12.30     | NA               | 95                | 64               | 41.84 ± 16.14     | NA                |
|                         |                           | 95                 | 64               | 42.31 ± 16.88     | NA               |                   |                  | NA                | NA                |
| Kim                     | 2020                      | 32                 | 26               | 39 (23 – 73)      | NA               | 31                | 21               | 33 (22 - 58)      | NA                |
| Gayathri                | 2020                      | 52                 | 20               | 42.25 ± 15.44     | NA               | 48                | 14               | 39.60 ± 12.79     | NA                |
| Bonfrate                | 2020                      | 15                 | 12               | 50 ± 11           | 24.3 ± 6.2       | 15                | 6                | 46 ± 10           | 23.8 ± 5.4        |
| Andresen                | 2020                      | 221                | 155              | 40.1 (12.8)       | 24.5 (5.3)       | 222               | 152              | 42.6 (13.8)       | 24.7 (5.0)        |
| Oh                      | 2019                      | 28                 | 17               | 32.5 (26.5–39.0)  | 22.2 (19.9–23.6) | 27                | 19               | 33.0(28.0–44.5)   | 20.7 (18.3–22.3)  |
| Madempudi               | 2019                      | 68                 | 12               | 44.4(20-60)       | NA               | 68                | 18               | 42.3 (20-60)      | NA                |
| Ashtiani                | 2019                      | 30                 | 16               | 31.2 ± 12.3       | NA               | 30                | 13               | 31.44 ± 7.6       | NA                |
| Sun                     | 2018                      | 105                | 42               | 43.00 (12.45)     | NA               | 95                | 42               | 44.91 (13.01)     | NA                |
| Shin                    | 2018                      | 30                 | 12               | 35.0 (32.0, 40.5) | 23.9 (21.6-27.6) | 30                | 17               | 38.0 (30.0- 46.0) | 22.9 (20.1, 27.9) |
| Preston                 | 2018                      | 76                 | 47               | 40.6±13.4         | NA               | 37                | 21               | 39.9 14.0         | NA                |
| Kim                     | 2018                      | 10                 | 3                | 28.6 ± 2.4        | 24.9 ± 0.5       | 12                | 6                | 26.7 ± 2.3        | 25.5 ± 0.6        |
| Ishaque et al.          | 2018                      | 181                | 45               | 32.2 ± 10.1       | NA               | 179               | 34               | 31.7 ± 9.7        | NA                |
| Cremon et al            | 2018                      | 20                 | 11               | 37.35 ± 11.25     | NA               | 20                | 15               | 44.55 ± 12.98     | NA                |
| Pinto-Sanchez           | 2017                      | 18                 | 12               | 46.5 (30–58)      | NA               | 20                | 12               | 40.0 (26–57)      | NA                |
| Nobutani                | 2017                      | 17                 | 9                | 52.6 ± 20.1       | NA               | 17                | 10               | 45.9±19.5         | NA                |
| Hod                     | 2017                      | 54                 | 54               | 29.0(25.0-45.0)   | 22.1(19.9-25.4)  | 53                | 53               | 30.0, 24.0- 42.0  | 22.5(19.5-24.8)   |
| Thijssen                | 2016                      | 39                 | 26               | 41.1 ± 14.8       | NA               | 41                | 29               | 42.4 ± 13.5       | NA                |
| Spiller                 | 2016                      | 192                | 161              | 45.3 (15.7)       | NA               | 187               | 156              | 45.4 (14.1)       | NA                |
| Mezzasalma              | 2016                      | 53                 | NA               | 36.0±11.9         | NA               | 52                | NA               | 38.1±13.5         | NA                |
|                         |                           | 52                 | NA               | 38.0±12.1         | NA               |                   |                  | NA                | NA                |
| Majeed                  | 2016                      | 18                 | 11               | 36.2 ± 11.07      | 24.6 ± 3.14      | 18                | 8                | 35.4 ± 10.75      | 24.1 ± 3.98       |
| Lyra                    | 2016                      | 129                | 94               | 47.1 ± 13.3       | 24.7 ± 3.7       | 131               | 94               | 49.4 ± 12.9       | 24.9 ± 3.7        |
| Yoon                    | 2015                      | 39                 | 20               | 59.9 ± 11.1       | NA               | 42                | 18               | 58.8 ± 13.3       | NA                |
| Wong                    | 2015                      | 20                 | 8                | 40.86 (3.51)      | NA               | 22                | 11               | 53.35 (4.15)      | NA                |
| de Chambrun             | 2015                      | 93                 | 72               | 42.5 ± 12.5       | NA               | 86                | 82               | 45.4 ± 14         | NA                |
| Yoon                    | 2014                      | 25                 | 14               | 45.9 ± 13.7       | NA               | 24                | 18               | 43.1 ± 15.1       | NA                |
| Stevenson               | 2014                      | 54                 | 52               | 48.15 ± 13.48     | 28.83 ± 7.12     | 27                | 27               | 47.27 ± 12.15     | 28.88 ± 7.74      |

|                   |      |     |     |               |                   |     |    |               |                  |
|-------------------|------|-----|-----|---------------|-------------------|-----|----|---------------|------------------|
| Sisson            | 2014 | 124 | 84  | 39·1 (10·5)   | NA                | 62  | 45 | 36·8 (10·8)   | NA               |
| Shavakhi          | 2014 | 66  | 46  | 36·1±7·9      | NA                | 63  | 39 | 36·4±10·5     | NA               |
| Ludidi            | 2014 | 21  | 15  | 40·0±2·2      | 25·8±1·1          | 19  | 12 | 41·1±4·2      | 25·1±0·9         |
| Lorenzo-Zuniga    | 2014 | 55  | 19  | 47·5±13·1     | 24·7±3·9          | 29  | 14 | 46·5±13·1     | 26·4±5·2         |
| Jafari            | 2014 | 54  | 33  | 36·6±12·1     | NA                | 54  | 32 | 36·8±11·0     | NA               |
| Abbas             | 2014 | 37  | 10  | 37·7±11·6     | NA                | 35  | 9  | 33·0±12·0     | NA               |
| Roberts           | 2013 | 88  | 73  | 44·66 (11·98) | 26·75 (4·03)      | 91  | 76 | 43·71 (12·76) | 25·85 (3·61)     |
| Lee               | 2013 | 46  | 32  | 33·1±7·6      | NA                | 39  | 21 | 32·7±7·8      | NA               |
| Charbonneau       | 2013 | 39  | 31  | 47·0±1·96     | NA                | 37  | 31 | 43·2±2·01     | NA               |
| Cappello          | 2013 | 34  | 22  | 36·6±2·2      | NA                | 34  | 19 | 40·8±2·2      | NA               |
| Begtrup           | 2013 | 67  | 51  | 31·63 (10·05) | 24·68 (4·60)      | 64  | 46 | 29·38 (8·64)  | 24·42(3·64)      |
| Amirimani         | 2013 | 41  | 20  | 44·9±13·0     | NA                | 31  | 16 | 37·7±10·5     | NA               |
| Kruis             | 2012 | 60  | 48  | 46·3±12·1     | NA                | 60  | 44 | 45·1±12·7     | NA               |
| Ducrotte          | 2012 | 108 | 38  | 36·53±12·08   | NA                | 106 | 25 | 38·40±13·13   | NA               |
| Dapoigny          | 2012 | 26  | 15  | 46·1±11·3     | 23·4±4·9          | 26  | 20 | 48·0±10·8     | 24·5±4·0         |
| Cui               | 2012 | 37  | 26  | 42·92±15·09   | 22·08±3·23        | 23  | 16 | 47·45±15·36   | 20·77±2·65       |
| Cha               | 2012 | 25  | 13  | 37·9±12·4     | 23·03±3·31        | 25  | 11 | 40·3±11·2     | 22·93±2·88       |
| Sondergaard       | 2011 | 32  | 20  | 53·9 (29–67)  | 24·7, 3·4         | 25  | 19 | 48·5 (29–67)  | 24·8, 4·3        |
| Michail           | 2011 | 15  | 10  | 21·8±17       | NA                | 9   | 6  | 21·8±17       | NA               |
| Guglielmetti      | 2011 | 60  | 41  | 36·65±12·42   | 24·60±5·19        | 62  | 41 | 40·98±12·80   | 24·02±4·45       |
| Choi              | 2011 | 45  | 17  | 40·2±13·1     | NA                | 45  | 20 | 40·6±12·9     | NA               |
| Simren            | 2010 | 37  | 26  | 42±15         | NA                | 37  | 26 | 44±16         | NA               |
| Ligaarden         | 2010 | 10  | NA  | 50 (11)       | 2·4 (3)           | 9   | NA | 50 (11)       | 2·4 (3)          |
| Hun               | 2009 | 22  | 18  | 48·3 (23–70)  | NA                | 22  | 18 | 48·36 (23–70) | NA               |
| Hong              | 2009 | 36  | 11  | 36±2          | NA                | 34  | 12 | 38±3          | NA               |
| Enck              | 2009 | 148 | 72  | 49·8 (19–70)  | 24·4 (17·2–37·6)  | 150 | 75 | 49·4 (18–76)  | 24·0 (17·1–33·2) |
| Dolin             | 2009 | 26  | 19  | 52·3±11·1     | NA                | 29  | 23 | 44·0±17·9     | NA               |
| Zeng              | 2008 | 14  | 4   | 44·6±12·4     | NA                | 15  | 6  | 45·8±9·2      | NA               |
| Williams          | 2008 | 28  | 25  | 40 (12)       | NA                | 28  | 20 | 38 (11)       | NA               |
| Sinn              | 2008 | 20  | 14  | 41·9±14·4     | 21·9±3·6          | 20  | 12 | 47·5±11·0     | 22·4±2·2         |
| Kajander          | 2008 | 43  | 41  | 50 (13)       | 25·5 (3·4)        | 43  | 39 | 46 (13)       | 26·8 (5·4)       |
| Enck              | 2008 | 149 | 72  | 49·8 (19–70)  | 24·4 (17·2–37·6)  | 148 | 75 | 49·4 (18–76)  | 24·0 (17·1–33·2) |
| Drouault-Holowacz | 2008 | 53  | 40  | 47±14         | NA                | 53  | 36 | 44±14         | NA               |
| Andriulli         | 2008 | 132 | 96  | 42·5 (12·93)  | NA                | 135 | 90 | 42·8 (12·10)  | NA               |
| Agrawal           | 2008 | 17  | 17  | 42 (24, 69)   | 25·0 (20·3, 29·6) | 17  | 17 | 37 (20, 59)   | 25·0 (20·3–29·6) |
| Guyonnet          | 2007 | 137 | 106 | 49·4 (11·4)   | NA                | 137 | 93 | 49·2 (11·4)   | NA               |
| Whorwell          | 2006 | 90  | 90  | 41·8 (1·10)   | NA                | 92  | 92 | 42·4 (1·09)   | NA               |
| O'Mahony          | 2005 | 50  | 32  | 44·3          | NA                | 25  | 16 | 44·3(18-73)   | NA               |
| Niv               | 2005 | 27  | 20  | 45·7±14·2     | NA                | 27  | 16 | 45·6±16·1     | NA               |
| Kim               | 2005 | 24  | 21  | 40±3          | NA                | 24  | 24 | 46+3          | NA               |
| Kajander          | 2005 | 52  | 39  | 46 (23–65)    | 25·7(16·9–36·6)   | 51  | 40 | 45 (21–65)    | 24·4(16·3–39·3)  |
| Kim               | 2003 | 12  | 10  | 48±5·7        | NA                | 13  | 8  | 38±3·4        | NA               |
| Niedzielin        | 2001 | 20  | 15  | 45±18         | 23·3±4·5          | 20  | 17 | 42±15         | 24·1±2·7         |

|        |      |    |    |           |    |    |    |           |    |
|--------|------|----|----|-----------|----|----|----|-----------|----|
| Nobaek | 2000 | 30 | 16 | 52(24-78) | NA | 30 | 20 | 46(21-66) | NA |
|--------|------|----|----|-----------|----|----|----|-----------|----|

I, intervention group; C, control group; BMI, body mass index.

Values are reported as mean  $\pm$  standard deviation, mean  $\pm$  standard error, median (range), or median (interquartile range)

**Table S3 Critical results of pairwise meta-analysis**

MD, mean difference; SMD, standardized mean difference; CI, confidence intervals; L95%CI, 95% confidence lower limit; U95% CI, 95% confidence upper limit;

**1. IBS-SSS**

| Treatment                  | number of studies | MD      | [95% Conf. Interval] |         | % Weight | Heterogeneity statistic | degrees of freedom | P     | I-squared** | Tau-squared | z    | p(Z)  |
|----------------------------|-------------------|---------|----------------------|---------|----------|-------------------------|--------------------|-------|-------------|-------------|------|-------|
| L. paracasei HA-196        | 1                 | -0.3    | -20.822              | 20.222  | 5.72     | 0                       | 0                  | .     | 0%          | 0           | 0.03 | 0.977 |
| L. plantarum CCFM8610      | 1                 | 0       | -31.719              | 31.719  | 4.96     | 0                       | 0                  | .     | 0%          | 0           | 0    | 1     |
| L. plantarum 299v          | 1                 | -5.94   | -58.975              | 47.095  | 3.52     | 0                       | 0                  | .     | 0%          | 0           | 0.22 | 0.826 |
| L. acidophilus DDS-1       | 1                 | -77.7   | -101.717             | -53.683 | 5.5      | 0                       | 0                  | .     | 0%          | 0           | 6.34 | 0     |
| L. acidophilus ATCC 700396 | 1                 | -6.8    | -28.503              | 14.903  | 5.65     | 0                       | 0                  | .     | 0%          | 0           | 0.61 | 0.539 |
| B. lactis UABla-12         | 1                 | -48.8   | -72.999              | -24.601 | 5.49     | 0                       | 0                  | .     | 0%          | 0           | 3.95 | 0     |
| B. longum R0175            | 1                 | 21.16   | 1.673                | 40.647  | 5.79     | 0                       | 0                  | .     | 0%          | 0           | 2.13 | 0.033 |
| B. bifidum MIMBb75         | 1                 | -29.83  | -48.237              | -11.423 | 5.85     | 0                       | 0                  | .     | 0%          | 0           | 3.18 | 0.001 |
| C. butyricum CGMCC0313.1   | 1                 | -21.38  | -40.466              | -2.294  | 5.81     | 0                       | 0                  | .     | 0%          | 0           | 2.2  | 0.028 |
| L. casei LCR35             | 1                 | 1.1     | -52.324              | 54.524  | 3.49     | 0                       | 0                  | .     | 0%          | 0           | 0.04 | 0.968 |
| BL+LR                      | 1                 | -81     | -130.739             | -31.261 | 3.72     | 0                       | 0                  | .     | 0%          | 0           | 3.19 | 0.001 |
| LC+LP+BAL                  | 1                 | -76.427 | -114.905             | -37.949 | 4.48     | 0                       | 0                  | .     | 0%          | 0           | 3.89 | 0     |
| BAL+ST+LB                  | 2                 | 23.037  | -13.008              | 59.082  | 7.75     | 1.21                    | 1                  | 0.271 | 17.50%      | 132.0778    | 1.25 | 0.21  |
| EF+LA+X                    | 1                 | -35     | -60.44               | -9.56   | 5.4      | 0                       | 0                  | .     | 0%          | 0           | 2.7  | 0.007 |
| BAL+LA+BB+X                | 2                 | -26.745 | -55.87               | 2.379   | 10.18    | 1.93                    | 1                  | 0.165 | 48.10%      | 281.9875    | 1.8  | 0.072 |
| LR+pf+X                    | 1                 | 23.93   | 12.849               | 35.011  | 6.21     | 0                       | 0                  | .     | 0%          | 0           | 4.23 | 0     |
| LP+LC+BL+ST+LA+X           | 2                 | -63.963 | -78.664              | -49.262 | 10.46    | 0.04                    | 1                  | 0.836 | 0.00%       | 0           | 8.53 | 0     |

## 2. IBS-QOL

| Study                    | number of studies | MD    | [95% Conf. Interval] |        | % Weight | Heterogeneity statistic | degrees of freedom | P | I-squared** | Tau-squared | Z    | p(Z)  |
|--------------------------|-------------------|-------|----------------------|--------|----------|-------------------------|--------------------|---|-------------|-------------|------|-------|
| L. paracasei HA-196      | 1                 | 0.4   | -2.795               | 3.595  | 12.01    | 0                       | 0                  | . | .%          | 0           | 0.25 | 0.806 |
| C. butyricum CGMCC0313.1 | 1                 | 4.073 | 0.496                | 7.65   | 11.89    | 0                       | 0                  | . | .%          | 0           | 2.23 | 0.026 |
| S. boulardii CNCM I-475  | 1                 | 5.7   | -1.067               | 12.467 | 10.63    | 0                       | 0                  | . | .%          | 0           | 1.65 | 0.099 |
| LC+LP+BAL                | 1                 | 3.76  | -4.814               | 12.334 | 9.75     | 0                       | 0                  | . | .%          | 0           | 0.86 | 0.39  |
| LPA+LA+BAL               | 1                 | 0.5   | -5.973               | 6.973  | 10.76    | 0                       | 0                  | . | .%          | 0           | 0.15 | 0.88  |
| BAL+ST+LB                | 1                 | 1.6   | -2.594               | 5.794  | 11.69    | 0                       | 0                  | . | .%          | 0           | 0.75 | 0.455 |
| EF+LA+X                  | 1                 | 1.6   | -2.513               | 5.713  | 11.72    | 0                       | 0                  | . | .%          | 0           | 0.76 | 0.446 |
| LA+LR+ST+BL+bbr+X        | 1                 | 3.5   | -4.895               | 11.895 | 9.84     | 0                       | 0                  | . | .%          | 0           | 0.82 | 0.414 |
| LP+LC+BL+ST+LA+X         | 1                 | 24.8  | 20.647               | 28.953 | 11.71    | 0                       | 0                  | . | .%          | 0           | 11.7 | 0     |

## 3. HADS-total score (a), HADS-anxiety (b), and HADS-depression (c)

| Treatment                  | number of studies | MD     | [95% Conf. Interval] | % Weight | Heterogeneity statistic | degrees of freedom | P | I-squared** | Tau-squared | Z | p(Z) |       |
|----------------------------|-------------------|--------|----------------------|----------|-------------------------|--------------------|---|-------------|-------------|---|------|-------|
| HADS total score           |                   |        |                      |          |                         |                    |   |             |             |   |      |       |
| L. paracasei HA-196        | 1                 | 0.031  | -0.122               | 0.184    | 45.83                   | 0                  | 0 | .           | 0.00%       | 0 | 0.4  | 0.691 |
| L. acidophilus ATCC 700396 | 1                 | -0.6   | -1.75                | 0.55     | 7.49                    | 0                  | 0 | .           | 0.00%       | 0 | 1.02 | 0.306 |
| B. longum R0175            | 1                 | -0.342 | -0.479               | -0.205   | 46.67                   | 0                  | 0 | .           | 0.00%       | 0 | 4.89 | 0     |
| HADS anxiety               |                   |        |                      |          |                         |                    |   |             |             |   |      |       |
| L. acidophilus ATCC 700396 | 1                 | -0.2   | -0.889               | 0.489    | 47.81                   | 0                  | 0 | .           | 0.00%       | 0 | 0.57 | 0.569 |
| B. longum NCC3001          | 1                 | -1.5   | -3.56                | 0.56     | 23.04                   | 0                  | 0 | .           | 0.00%       | 0 | 1.43 | 0.153 |
| LPA+LA+BAL                 | 1                 | 1.4    | -0.249               | 3.049    | 29.15                   | 0                  | 0 | .           | 0.00%       | 0 | 1.66 | 0.096 |
| HADS depression            |                   |        |                      |          |                         |                    |   |             |             |   |      |       |
| L. paracasei CNCM I-1572   | 1                 | -0.63  | -1.839               | 0.579    | 25.39                   | 0                  | 0 | .           | 0.00%       | 0 | 1.02 | 0.307 |
| L. acidophilus ATCC 700396 | 1                 | -0.3   | -0.884               | 0.284    | 37.48                   | 0                  | 0 | .           | 0.00%       | 0 | 1.01 | 0.314 |
| B. longum NCC3001          | 1                 | -3     | -4.918               | -1.082   | 15.5                    | 0                  | 0 | .           | 0.00%       | 0 | 3.07 | 0.002 |

#### 4. Abdominal pain score

| treatment                    | number of studies | SMD     | [95% Conf. Interval] | % Weight | Heterogeneity statistic | degrees of freedom | P      | I-squared** | Tau-squared | Z     |       |
|------------------------------|-------------------|---------|----------------------|----------|-------------------------|--------------------|--------|-------------|-------------|-------|-------|
| L. plantarum CCFM8610        | 1                 | 10      | -0.125 20.125        | 2.01     | 0                       | 0                  | .      | 0           | 1.94        | 0.053 |       |
| S. cerevisiae CNCM I-3856    | 3                 | -15.816 | -21.673 -9.959       | 5.01     | 1.7                     | 1                  | 19.20% | 41.20%      | 8.1822      | 5.29  | 0     |
| L. plantarum Apsulloc 331261 | 1                 | -26.6   | -43.497 -9.703       | 1.25     | 0                       | 0                  | .      | 0           | 3.09        | 0.002 |       |
| L. plantarum 299v            | 1                 | -4      | -11.147 3.147        | 2.42     | 0                       | 0                  | .      | 0           | 1.1         | 0.273 |       |
| B. coagulans Unique IS2      | 1                 | -32     | -38.648 -25.352      | 2.49     | 0                       | 0                  | .      | 0           | 9.43        | 0     |       |
| B. coagulans MTCC 5856       | 1                 | -41.8   | -57.855 -25.745      | 1.32     | 0                       | 0                  | .      | 0           | 5.1         | 0     |       |
| L. acidophilus DDS-1         | 1                 | -19.53  | -27.337 -11.723      | 2.33     | 0                       | 0                  | .      | 0           | 4.9         | 0     |       |
| L. acidophilus ATCC 700396   | 1                 | -3      | -9.022 3.022         | 2.57     | 0                       | 0                  | .      | 0           | 0.98        | 0.329 |       |
| L. acidophilus SDC 2012,2013 | 1                 | -12     | -19.252 -4.748       | 2.41     | 0                       | 0                  | .      | 0           | 3.24        | 0.001 |       |
| B. lactis UABla-12           | 1                 | -11.11  | -19.466 -2.754       | 2.25     | 0                       | 0                  | .      | 0           | 2.61        | 0.009 |       |
| B. bifidum MIMBb75           | 2                 | -7.014  | -13.939 -0.09        | 5.68     | 6.82                    | 1                  | 0.90%  | 85.30%      | 21.326      | 1.99  | 0.047 |
| C. butyricum CGMCC0313.1     | 1                 | -6.05   | -16.286 4.186        | 1.99     | 0                       | 0                  | .      | 0           | 1.16        | 0.247 |       |
| L. gasseri BNR17             | 1                 | -36.1   | -62.071 -10.129      | 0.69     | 0                       | 0                  | .      | 0           | 2.72        | 0.006 |       |
| B. infantis 35624            | 1                 | 7.4     | -1.192 15.992        | 2.22     | 0                       | 0                  | .      | 0           | 1.69        | 0.091 |       |
| L. casei LCR35               | 1                 | -1.2    | -14.645 12.245       | 1.59     | 0                       | 0                  | .      | 0           | 0.17        | 0.861 |       |
| S. boulardii CNCM I-475      | 2                 | 3.563   | -4.871 11.998        | 4.12     | 1.51                    | 1                  | 0.219  | 33.80%      | 12.9656     | 0.83  | 0.408 |
| LA+LA                        | 1                 | -6.2    | -13.269 0.869        | 2.43     | 0                       | 0                  | .      | 0           | 1.72        | 0.086 |       |
| BL+LR                        | 1                 | -17     | -29.97 -4.03         | 1.65     | 0                       | 0                  | .      | 0           | 2.57        | 0.01  |       |
| LPA+Is+LP                    | 1                 | -20     | -31.005 -8.995       | 1.89     | 0                       | 0                  | .      | 0           | 3.56        | 0     |       |
| LPA+LA+BAL                   | 2                 | 1.313   | -5.812 8.438         | 3.76     | 0.98                    | 1                  | 0.322  | 0.00%       | 0           | 0.36  | 0.718 |
| BAL+ST+LB                    | 4                 | -0.588  | -5.173 3.997         | 8.74     | 4.1                     | 3                  | 25.10% | 26.80%      | 6.0342      | 0.25  | 0.801 |
| LP+LP+pa                     | 1                 | -7      | -10.331 -3.669       | 2.88     | 0                       | 0                  | .      | 0           | 4.12        | 0     |       |
| EF+LA+X                      | 2                 | -10.953 | -19.947 -1.96        | 4.25     | 1.75                    | 1                  | 0.186  | 42.70%      | 24.9241     | 2.39  | 0.017 |
| LA+ST+X                      | 3                 | -7.634  | -10.875 -4.394       | 7.92     | 2.24                    | 2                  | 32.60% | 10.90%      | 0.9214      | 4.62  | 0     |
| BAL+LA+BB+X                  | 1                 | -11.13  | -23.238 0.978        | 1.75     | 0                       | 0                  | .      | 0           | 1.8         | 0.072 |       |
| LR+pf+X                      | 1                 | -10.71  | -19.369 -2.051       | 2.21     | 0                       | 0                  | .      | 0           | 2.42        | 0.015 |       |
| BAL+LA+LR+X                  | 3                 | 2.136   | -13.231 17.503       | 5.09     | 8.94                    | 2                  | 0.011  | 77.60%      | 141.8685    | 0.27  | 0.785 |
| LA+LR+ST+BL+bbr+X            | 3                 | -7.448  | -15.712 0.815        | 5.45     | 3.08                    | 2                  | 21.40% | 35.20%      | 18.8069     | 1.77  | 0.077 |
| VSL#3                        | 2                 | -12.794 | -22.901 -2.688       | 3.14     | 1.1                     | 1                  | 29.50% | 8.70%       | 4.65        | 2.48  | 0.013 |
| LP+LC+BL+ST+LA+X             | 4                 | -6.742  | -18.468 4.984        | 8.48     | 23.54                   | 3                  | 0.00%  | 87.30%      | 118.7792    | 1.13  | 0.26  |

## 5. Abdominal bloating score

| treatment                    | number of studies | SMD     | [95% Conf. Interval] | % Weight | Heterogeneity statistic | degrees of freedom | P | I-squared** | Tau-squared | p        | p(Z)  |
|------------------------------|-------------------|---------|----------------------|----------|-------------------------|--------------------|---|-------------|-------------|----------|-------|
| L. plantarum CCFM8610        | 1                 | -20     | -31.098              | -8.902   | 2.58                    | 0                  | 0 | .           | 0           | 3.53     | 0     |
| S. cerevisiae CNCM I-3856    | 1                 | -8.34   | -25.955              | 9.275    | 1.51                    | 0                  | 0 | .           | 0           | 0.93     | 0.353 |
| L. plantarum Apsulloc 331261 | 1                 | -22.7   | -46.998              | 1.598    | 0.94                    | 0                  | 0 | .           | 0           | 1.83     | 0.067 |
| L. plantarum 299v            | 1                 | -14.79  | -24.912              | -4.668   | 2.79                    | 0                  | 0 | .           | 0           | 2.86     | 0.004 |
| B. coagulans Unique IS2      | 1                 | -8      | -18.397              | 2.397    | 2.73                    | 0                  | 0 | .           | 0           | 1.51     | 0.132 |
| B. coagulans MTCC 5856       | 1                 | -30.67  | -66.889              | 5.549    | 0.47                    | 0                  | 0 | .           | 0           | 1.66     | 0.097 |
| L. acidophilus DDS-1         | 1                 | -11.73  | -20.84               | -2.62    | 3.03                    | 0                  | 0 | .           | 0           | 2.52     | 0.012 |
| L. acidophilus ATCC 700396   | 1                 | -1.1    | -8.081               | 5.881    | 3.57                    | 0                  | 0 | .           | 0           | 0.31     | 0.757 |
| B. lactis UABla-12           | 1                 | -6.43   | -15.718              | 2.858    | 2.99                    | 0                  | 0 | .           | 0           | 1.36     | 0.175 |
| B. bifidum MIMBb75           | 1                 | -11.83  | -16.371              | -7.289   | 4.18                    | 0                  | 0 | .           | 0           | 5.11     | 0     |
| C. butyricum CGMCC0313.1     | 1                 | -0.956  | -5.864               | 3.952    | 4.1                     | 0                  | 0 | .           | 0           | 0.38     | 0.703 |
| B. infantis 35624            | 1                 | 1.4     | -7.428               | 10.228   | 3.1                     | 0                  | 0 | .           | 0           | 0.31     | 0.756 |
| S. boulardii CNCM I-475      | 2                 | -1.181  | -9.73                | 7.368    | 4.73                    | 0.31               | 1 | 0.579       | 0.00%       | 0        | 0.27  |
| BL+LR                        | 2                 | -34     | -54.59               | -13.41   | 1.21                    | 0                  | 0 | .           | 0           | 3.24     | 0.001 |
| LPA+LA+BAL                   | 2                 | 5.909   | -1.69                | 13.507   | 5.04                    | 0.1                | 1 | 0.757       | 0.00%       | 0        | 1.52  |
| BAL+ST+LB                    | 4                 | -0.618  | -4.645               | 3.409    | 11.14                   | 1.94               | 3 | 0.586       | 0.00%       | 0        | 0.3   |
| EF+LA+X                      | 1                 | -4.6    | -12.051              | 2.851    | 3.45                    | 0                  | 0 | .           | 0           | 1.21     | 0.226 |
| LA+ST+X                      | 1                 | -9.3    | -14.955              | -3.645   | 3.91                    | 0                  | 0 | .           | 0           | 3.22     | 0.001 |
| BAL+LA+BB+X                  | 1                 | -8      | -22.207              | 6.207    | 1.99                    | 0                  | 0 | .           | 0           | 1.1      | 0.27  |
| LR+pf+X                      | 1                 | -10.71  | -20.504              | -0.916   | 2.87                    | 0                  | 0 | .           | 0           | 2.14     | 0.032 |
| BAL+LA+LR+X                  | 5                 | -1.911  | -9.478               | 5.657    | 6.29                    | 1.83               | 2 | 0.401       | 0.00%       | 0        | 0.49  |
| LA+LR+ST+BL+bbr+X            | 3                 | -2.721  | -9.348               | 3.905    | 7.32                    | 1.97               | 2 | 0.374       | 0.00%       | 0        | 0.8   |
| VSL#3                        | 3                 | -13.617 | -19.48               | -7.754   | 8.1                     | 0.43               | 2 | 0.805       | 0.00%       | 0        | 4.55  |
| LP+LC+BL+ST+LA+X             | 4                 | -4.49   | -16.933              | 7.953    | 11.94                   | 25.61              | 3 | 0           | 88.30%      | 134.8589 | 0.71  |

## 6. Bowel movement frequency (per week) in IBS-D and IBS-D

| treatment                                           | number of studies | MD     | [95% Conf. Interval] | % Weight | Heterogeneity statistic | degrees of freedom | P | I-squared** | Tau-squared | Z       | p(Z)  |
|-----------------------------------------------------|-------------------|--------|----------------------|----------|-------------------------|--------------------|---|-------------|-------------|---------|-------|
| <b>Bowel movement frequency (per week) in IBS-D</b> |                   |        |                      |          |                         |                    |   |             |             |         |       |
| L. paracasei HA-196                                 | 1                 | -3.127 | -4.628               | -1.626   | 11.56                   | 0                  | . | 0%          | 0           | 4.08    | 0     |
| L. paracasei B21060                                 | 1                 | -5.11  | -9.983               | -0.237   | 3.78                    | 0                  | . | 0%          | 0           | 2.06    | 0.04  |
| S. cerevisiae CNCM I-3856                           | 1                 | 0      | -2.707               | 2.707    | 7.78                    | 0                  | . | 0%          | 0           | 0       | 1     |
| L. plantarum Apsulloc 331261                        | 1                 | -2.05  | -4.786               | 0.686    | 7.7                     | 0                  | . | 0%          | 0           | 1.47    | 0.142 |
| B. coagulans GBI-30,6086                            | 1                 | -2.114 | -2.996               | -1.232   | 13.46                   | 0                  | . | 0%          | 0           | 4.7     | 0     |
| B. longum R0175                                     | 1                 | -1.953 | -3.453               | -0.453   | 11.56                   | 0                  | . | 0%          | 0           | 2.55    | 0.011 |
| C. butyricum CGMCC0313.1                            | 1                 | -0.516 | -1.06                | 0.028    | 14.22                   | 0                  | . | 0%          | 0           | 1.86    | 0.063 |
| S. boulardii CNCM I-475                             | 2                 | 2.246  | -0.464               | 4.956    | 10.23                   | 0.02               | 1 | 0.877       | 0.00%       | 0       | 0.104 |
| EF+LA+X                                             | 1                 | -3.948 | -5.019               | -2.877   | 12.93                   | 0                  | . | 0%          | 0           | 7.23    | 0     |
| LP+LC+BL+ST+LA+X                                    | 1                 | -0.7   | -3.797               | 2.397    | 6.79                    | 0                  | . | 0%          | 0           | 0.44    | 0.658 |
| <b>Bowel movement frequency (per week) in IBS-C</b> |                   |        |                      |          |                         |                    |   |             |             |         |       |
| treatment                                           | number of studies | MD     | [95% Conf. Interval] | % Weight | Heterogeneity statistic | degrees of freedom | P | I-squared** | Tau-squared | Z       | p(Z)  |
| L. paracasei HA-196                                 | 1                 | 1.341  | 0.499                | 2.183    | 15.05                   | 0                  | . | 0%          | 0           | 3.12    | 0.002 |
| S. cerevisiae CNCM I-3856                           | 1                 | 1.4    | 0.413                | 2.387    | 14.3                    | 0                  | . | 0%          | 0           | 2.78    | 0.005 |
| B. coagulans Unique IS2                             | 1                 | 1.3    | 0.728                | 1.872    | 16.29                   | 0                  | . | 0%          | 0           | 4.45    | 0     |
| B. longum R0175                                     | 1                 | 0.838  | -0.599               | 2.275    | 11.85                   | 0                  | . | 0%          | 0           | 1.14    | 0.253 |
| B. bifidum MIMBb75                                  | 1                 | 2.67   | 0.017                | 5.323    | 6.66                    | 0                  | . | 0%          | 0           | 1.97    | 0.049 |
| BAL+ST+LB                                           | 2                 | 0.019  | -3.791               | 3.83     | 31.19                   | 27.63              | 2 | 0           | 92.80%      | 10.3662 | 0.01  |
| LA+ST+X                                             | 1                 | 1.624  | -1.829               | 5.077    | 4.66                    | 0                  | . | 0%          | 0           | 0.92    | 0.357 |

## 7. Bristol stool form scale in IBS-D and IBS-C

| treatment                                | number of studies | MD     | [95% Conf. Interval] | % Weight | Heterogeneity statistic | degrees of freedom | P     | I-squared** | Tau-squared | Z    | p(Z)  |
|------------------------------------------|-------------------|--------|----------------------|----------|-------------------------|--------------------|-------|-------------|-------------|------|-------|
| <b>Bristol stool form scale in IBS-D</b> |                   |        |                      |          |                         |                    |       |             |             |      |       |
| L. paracasei HA-196                      | 1                 | -0.25  | -1.074               | 0.574    | 6.05                    | 0                  | .     | 0%          | 0           | 0.59 | 0.552 |
| S. cerevisiae CNCM I-3856                | 1                 | -1.245 | -1.634               | -0.856   | 9.28                    | 0                  | .     | 0%          | 0           | 6.27 | 0     |
| B. coagulans MTCC 5856                   | 1                 | -3.276 | -5.215               | -1.337   | 2                       | 0                  | .     | 0%          | 0           | 3.31 | 0.001 |
| B. longum R0175                          | 1                 | -0.06  | -0.768               | 0.648    | 6.85                    | 0                  | .     | 0%          | 0           | 0.17 | 0.868 |
| B. bifidum MIMBb75                       | 1                 | -0.2   | -0.411               | 0.011    | 10.4                    | 0                  | .     | 0%          | 0           | 1.86 | 0.063 |
| C. butyricum CGMCC0313.1                 | 1                 | -0.112 | -0.478               | 0.254    | 9.44                    | 0                  | .     | 0%          | 0           | 0.6  | 0.548 |
| S. boulardii CNCM I-475                  | 2                 | 0.499  | 0.082                | 0.915    | 15.45                   | 0.18               | 0.669 | 0.00%       | 0           | 2.35 | 0.019 |
| BL+LR                                    | 1                 | -0.8   | -1.566               | -0.034   | 6.44                    | 0                  | .     | 0%          | 0           | 2.05 | 0.041 |
| LP+LP+pa                                 | 1                 | -0.5   | -0.761               | -0.239   | 10.13                   | 0                  | .     | 0%          | 0           | 3.75 | 0     |
| LA+LR+ST+BL+bbr+X                        | 1                 | -0.7   | -1.324               | -0.076   | 7.48                    | 0                  | .     | 0%          | 0           | 2.2  | 0.028 |
| VSL#3                                    | 1                 | -0.2   | -0.817               | 0.417    | 7.53                    | 0                  | .     | 0%          | 0           | 0.63 | 0.526 |
| LP+LC+BL+ST+LA+X                         | 1                 | 0.36   | -0.071               | 0.791    | 8.96                    | 0                  | .     | 0%          | 0           | 1.64 | 0.102 |
| <b>Bristol stool form scale in IBS-C</b> |                   |        |                      |          |                         |                    |       |             |             |      |       |
| treatment                                | number of studies | MD     | [95% Conf. Interval] | % Weight | Heterogeneity statistic | degrees of freedom | P     | I-squared** | Tau-squared | Z    | Z(p)  |
| L. paracasei HA-196                      | 1                 | 1.03   | 0.089                | 1.971    | 15.83                   | 0                  | .     | 0%          | 0           | 2.15 | 0.032 |
| S. cerevisiae CNCM I-3856                | 1                 | 1.17   | 0.235                | 2.105    | 15.94                   | 0                  | .     | 0%          | 0           | 2.45 | 0.014 |
| B. longum R0175                          | 1                 | 0.13   | -1.344               | 1.604    | 8.51                    | 0                  | .     | 0%          | 0           | 0.17 | 0.863 |
| BAL+ST+LB                                | 2                 | 0.34   | -0.393               | 1.072    | 59.72                   | 5.8                | 0.016 | 82.80%      | 0.2315      | 0.91 | 0.364 |

League table demonstrating the relative efficacy for each pair of comparisons for abdominal pain score (blue background) and abdominal bloating score (green background). Comparisons should start with longitudinal probiotics and compare with horizontal probiotics. Bold values denote a statistically significant difference.

[illegible]

|                            |                          |                         |                        |                        |                        |                        |                        |                     |         |
|----------------------------|--------------------------|-------------------------|------------------------|------------------------|------------------------|------------------------|------------------------|---------------------|---------|
| L. acidophilus ATCC 700396 |                          |                         |                        |                        |                        |                        |                        |                     |         |
| -3.67 (-8.47,1.12)         | C. butyricum CGMCC0313.1 |                         |                        |                        |                        |                        |                        |                     |         |
| -5.30 (-12.78,2.18)        | -1.63 (-9.28,6.03)       | S. boulardii CNCM I-475 |                        |                        |                        |                        |                        |                     |         |
| -3.36 (-12.51,5.79)        | 0.31 (-8.98,9.60)        | 1.94 (-8.98,12.86)      | LC+LP+BAL              |                        |                        |                        |                        |                     |         |
| -0.10 (-7.32,7.12)         | 3.57 (-3.82,10.97)       | 5.20 (-4.16,14.56)      | 3.26 (-7.48,14.00)     | LPA+LA+BAL             |                        |                        |                        |                     |         |
| -1.20 (-6.47,4.07)         | 2.47 (-3.04,7.99)        | 4.10 (-3.86,12.06)      | 2.16 (-7.39,11.70)     | -1.10 (-8.81,6.61)     | BAL+ST+LB              |                        |                        |                     |         |
| -1.20 (-6.41,4.01)         | 2.47 (-2.98,7.92)        | 4.10 (-3.82,12.02)      | 2.16 (-7.35,11.67)     | -1.10 (-8.77,6.57)     | 0.00 (-5.87,5.87)      | EF+LA+X                |                        |                     |         |
| -3.10 (-12.08,5.88)        | 0.57 (-8.55,9.70)        | 2.20 (-8.58,12.98)      | 0.26 (-11.74,12.26)    | -3.00 (-13.60,7.60)    | -1.90 (-11.28,7.48)    | -1.90 (-11.25,7.45)    | LA+LR+ST+BL+BBR+X      |                     |         |
| -24.40 (-29.64,-19.16)     | -20.73 (-26.21,-15.25)   | -19.10 (-27.04,-11.16)  | -21.04 (-30.57,-11.51) | -24.30 (-31.99,-16.61) | -23.20 (-29.10,-17.30) | -23.20 (-29.04,-17.36) | -21.30 (-30.67,-11.93) | LP+LC+BL+ST+LA+X    |         |
| 0.40 (-2.80,3.60)          | 4.07 (0.50,7.65)         | 5.70 (-1.07,12.47)      | 3.76 (-4.81,12.33)     | 0.50 (-5.97,6.97)      | 1.60 (-2.59,5.79)      | 1.60 (-2.51,5.71)      | 3.50 (-4.90,11.90)     | 24.80 (20.65,28.95) | Placebo |

**3. HADS-total score**

|                     |                            |                     |         |
|---------------------|----------------------------|---------------------|---------|
| L. paracasei HA-196 |                            |                     |         |
| 0.63 (-0.53,1.79)   | L. acidophilus ATCC 700396 |                     |         |
| 0.37 (0.23,0.52)    | -0.26 (-1.42,0.90)         | B. longum R0175     |         |
| 0.03 (-0.13,0.19)   | -0.60 (-1.75,0.55)         | -0.34 (-0.48,-0.20) | Placebo |

**4. HADS-anxiety**

|                            |                     |                   |         |
|----------------------------|---------------------|-------------------|---------|
| L. acidophilus ATCC 700396 |                     |                   |         |
| 1.30 (-0.87,3.47)          | B. longum NCC3001   |                   |         |
| -1.60 (-3.39,0.19)         | -2.90 (-5.54,-0.26) | LPA+LA+BAL        |         |
| -0.20 (-0.89,0.49)         | -1.50 (-3.56,0.56)  | 1.40 (-0.25,3.05) | Placebo |

**5. HADS-depression**

|                          |                            |                     |                    |         |
|--------------------------|----------------------------|---------------------|--------------------|---------|
| L. paracasei CNCM I-1572 |                            |                     |                    |         |
| -0.33 (-1.67,1.01)       | L. acidophilus ATCC 700396 |                     |                    |         |
| 2.37 (0.10,4.64)         | 2.70 (0.70,4.70)           | B. longum NCC3001   |                    |         |
| -0.63 (-2.51,1.25)       | -0.30 (-1.85,1.25)         | -3.00 (-5.40,-0.60) | LPA+LA+BAL         |         |
| -0.63 (-1.84,0.58)       | -0.30 (-0.88,0.28)         | -3.00 (-4.92,-1.08) | -0.00 (-1.44,1.44) | Placebo |

## 6. Abdominal pain score

[illegible]

## 7. Abdominal bloating score

[illegible]

## 8. Bowel movement frequency (per week) in IBS-D

|                     |                      |                           |                              |                         |                     |                    |                   |                     |                    |         |  |  |  |
|---------------------|----------------------|---------------------------|------------------------------|-------------------------|---------------------|--------------------|-------------------|---------------------|--------------------|---------|--|--|--|
| L. paracasei HA-196 |                      |                           |                              |                         |                     |                    |                   |                     |                    |         |  |  |  |
| 1.98 (-3.11,7.08)   | L. paracasei B21060  |                           |                              |                         |                     |                    |                   |                     |                    |         |  |  |  |
| -3.13 (-6.22,-0.03) | -5.11 (-10.68,0.46)  | S. cerevisiae CNCM I-3856 |                              |                         |                     |                    |                   |                     |                    |         |  |  |  |
| -1.07 (-4.19,2.05)  | -3.06 (-8.65,2.53)   | 2.05 (-1.80,5.90)         | L. plantarum Apsulloc 331261 |                         |                     |                    |                   |                     |                    |         |  |  |  |
| -1.01 (-2.75,0.73)  | -3.00 (-7.95,1.96)   | 2.11 (-0.73,4.96)         | 0.06 (-2.81,2.94)            | B. coagulans GBI-306086 |                     |                    |                   |                     |                    |         |  |  |  |
| -1.17 (-2.60,0.26)  | -3.16 (-8.26,1.94)   | 1.95 (-1.14,5.05)         | -0.10 (-3.22,3.02)           | -0.16 (-1.90,1.58)      | B. longum R0175     |                    |                   |                     |                    |         |  |  |  |
| -2.61 (-4.21,-1.01) | -4.59 (-9.50,0.31)   | 0.52 (-2.25,3.28)         | -1.54 (-4.32,1.25)           | -1.60 (-2.63,-0.56)     | -1.44 (-3.03,0.16)  | C. butyricum       |                   |                     |                    |         |  |  |  |
| -5.37 (-8.47,-2.27) | -7.36 (-12.93,-1.78) | -2.25 (-6.08,1.58)        | -4.30 (-8.15,-0.45)          | -4.36 (-7.21,-1.51)     | -4.20 (-7.30,-1.10) | -2.76 (-5.53,0.00) | S. boulardii      |                     |                    |         |  |  |  |
| 0.82 (-1.02,2.67)   | -1.16 (-6.15,3.83)   | 3.95 (1.04,6.86)          | 1.90 (-1.04,4.83)            | 1.83 (0.45,3.22)        | 2.00 (0.15,3.84)    | 3.43 (2.23,4.63)   | 6.19 (3.28,9.11)  | EF+LA+X             |                    |         |  |  |  |
| -2.43 (-5.87,1.02)  | -4.41 (-10.18,1.36)  | 0.70 (-3.41,4.81)         | -1.35 (-5.48,2.78)           | -1.41 (-4.63,1.81)      | -1.25 (-4.69,2.19)  | 0.18 (-2.96,3.33)  | 2.95 (-1.17,7.06) | -3.25 (-6.52,0.03)  |                    |         |  |  |  |
| -3.13 (-4.63,-1.62) | -5.11 (-9.98,-0.24)  | -0.00 (-2.71,2.71)        | -2.05 (-4.79,0.68)           | -2.11 (-3.00,-1.23)     | -1.95 (-3.45,-0.45) | -0.52 (-1.06,0.03) | 2.25 (-0.46,4.96) | -3.95 (-5.02,-2.88) | -0.70 (-3.80,2.40) | Placebo |  |  |  |

## 9. Bowel movement frequency (per week) in IBS-C

|                     |                           |                         |  |                     |                    |  |                    |                   |         |  |  |  |  |
|---------------------|---------------------------|-------------------------|--|---------------------|--------------------|--|--------------------|-------------------|---------|--|--|--|--|
| L. paracasei HA-196 |                           |                         |  |                     |                    |  |                    |                   |         |  |  |  |  |
| -0.08 (-7.77,7.60)  | S. cerevisiae CNCM I-3856 |                         |  |                     |                    |  |                    |                   |         |  |  |  |  |
| 0.02 (-7.62,7.66)   | 0.10 (-7.60,7.80)         | B. coagulans Unique IS2 |  |                     |                    |  |                    |                   |         |  |  |  |  |
| 0.49 (-5.06,6.04)   | 0.57 (-7.23,8.37)         | 0.47 (-7.28,8.23)       |  | B. longum R0175     |                    |  |                    |                   |         |  |  |  |  |
| -1.35 (-9.42,6.72)  | -1.27 (-9.39,6.85)        | -1.37 (-9.45,6.71)      |  | -1.84 (-10.02,6.34) | B. bifidum MIMBb75 |  |                    |                   |         |  |  |  |  |
| 1.25 (-5.06,7.57)   | 1.33 (-5.06,7.73)         | 1.23 (-5.11,7.58)       |  | 0.76 (-5.70,7.23)   | 2.60 (-4.25,9.46)  |  | BAL+ST+LB          |                   |         |  |  |  |  |
| -0.30 (-8.67,8.06)  | -0.22 (-8.64,8.19)        | -0.32 (-8.70,8.06)      |  | -0.80 (-9.27,7.68)  | 1.05 (-7.72,9.82)  |  | -1.56 (-8.76,5.65) | LA+ST+X           |         |  |  |  |  |
| 1.32 (-4.08,6.72)   | 1.40 (-4.07,6.87)         | 1.30 (-4.11,6.71)       |  | 0.83 (-4.73,6.39)   | 2.67 (-3.33,8.67)  |  | 0.07 (-3.25,3.38)  | 1.62 (-4.77,8.02) | Placebo |  |  |  |  |

## 10. Bristol stool form scale in IBS-D

|                     |                           |                        |                    |                     |                     |                   |                     |                     |                     |                    |                   |         |  |  |  |  |  |
|---------------------|---------------------------|------------------------|--------------------|---------------------|---------------------|-------------------|---------------------|---------------------|---------------------|--------------------|-------------------|---------|--|--|--|--|--|
| L. paracasei HA-196 |                           |                        |                    |                     |                     |                   |                     |                     |                     |                    |                   |         |  |  |  |  |  |
| 1.00 (0.09,1.91)    | S. cerevisiae CNCM I-3856 |                        |                    |                     |                     |                   |                     |                     |                     |                    |                   |         |  |  |  |  |  |
| 3.03 (0.92,5.13)    | 2.03 (0.05,4.01)          | B. coagulans MTCC 5856 |                    |                     |                     |                   |                     |                     |                     |                    |                   |         |  |  |  |  |  |
| -0.19 (-1.10,0.72)  | -1.19 (-1.99,-0.38)       | -3.22 (-5.28,-1.15)    | B. longum R0175    |                     |                     |                   |                     |                     |                     |                    |                   |         |  |  |  |  |  |
| -0.05 (-0.90,0.80)  | -1.04 (-1.49,-0.60)       | -3.08 (-5.03,-1.13)    | 0.14 (-0.60,0.88)  | B. bifidum MIMBb75  |                     |                   |                     |                     |                     |                    |                   |         |  |  |  |  |  |
| -0.14 (-1.04,0.76)  | -1.13 (-1.67,-0.60)       | -3.16 (-5.14,-1.19)    | 0.05 (-0.74,0.85)  | -0.09 (-0.51,0.33)  | C. butyricum        |                   |                     |                     |                     |                    |                   |         |  |  |  |  |  |
| -0.75 (-1.67,0.17)  | -1.74 (-2.31,-1.17)       | -3.77 (-5.76,-1.79)    | -0.56 (-1.38,0.26) | -0.70 (-1.17,-0.23) | -0.61 (-1.17,-0.06) | S. boulardii      |                     |                     |                     |                    |                   |         |  |  |  |  |  |
| 0.55 (-0.57,1.67)   | -0.45 (-1.30,0.41)        | -2.48 (-4.56,-0.39)    | 0.74 (-0.30,1.78)  | 0.60 (-0.19,1.39)   | 0.69 (-0.16,1.54)   | 1.30 (0.43,2.17)  | BL+LR               |                     |                     |                    |                   |         |  |  |  |  |  |
| 0.25 (-0.61,1.11)   | -0.74 (-1.21,-0.28)       | -2.78 (-4.73,-0.82)    | 0.44 (-0.31,1.19)  | 0.30 (-0.04,0.64)   | 0.39 (-0.06,0.84)   | 1.00 (0.51,1.49)  | -0.30 (-1.11,0.51)  | LP+LP+PA            |                     |                    |                   |         |  |  |  |  |  |
| 0.45 (-0.58,1.48)   | -0.54 (-1.28,0.19)        | -2.58 (-4.61,-0.54)    | 0.64 (-0.30,1.58)  | 0.50 (-0.16,1.16)   | 0.59 (-0.14,1.31)   | 1.20 (0.45,1.95)  | -0.10 (-1.09,0.89)  | 0.20 (-0.48,0.88)   | LA+LR+ST+BL+BBR+X   |                    |                   |         |  |  |  |  |  |
| -0.05 (-1.08,0.98)  | -1.04 (-1.77,-0.32)       | -3.08 (-5.11,-1.04)    | 0.14 (-0.80,1.08)  | 0.00 (-0.65,0.65)   | 0.09 (-0.63,0.81)   | 0.70 (-0.05,1.44) | -0.60 (-1.58,0.38)  | -0.30 (-0.97,0.37)  | -0.50 (-1.38,0.38)  | VSL#3              |                   |         |  |  |  |  |  |
| -0.61 (-1.54,0.32)  | -1.60 (-2.19,-1.02)       | -3.64 (-5.62,-1.65)    | -0.42 (-1.25,0.41) | -0.56 (-1.04,-0.08) | -0.47 (-1.04,0.09)  | 0.14 (-0.46,0.74) | -1.16 (-2.04,-0.28) | -0.86 (-1.36,-0.36) | -1.06 (-1.82,-0.30) | -0.56 (-1.31,0.19) | LP+LC+BL+ST+LA+X  |         |  |  |  |  |  |
| -0.25 (-1.07,0.57)  | -1.24 (-1.63,-0.86)       | -3.28 (-5.21,-1.34)    | -0.06 (-0.77,0.65) | -0.20 (-0.41,0.01)  | -0.11 (-0.48,0.25)  | 0.50 (0.08,0.92)  | -0.80 (-1.57,-0.03) | -0.50 (-0.76,-0.24) | -0.70 (-1.32,-0.08) | -0.20 (-0.82,0.42) | 0.36 (-0.07,0.79) | Placebo |  |  |  |  |  |

**11. Bristol stool form scale in IBS-C.**

|                     |                           |                    |                   |         |
|---------------------|---------------------------|--------------------|-------------------|---------|
| L. paracasei HA-196 |                           |                    |                   |         |
| -0.14 (-2.02,1.74)  | S. cerevisiae CNCM I-3856 |                    |                   |         |
| 0.90 (-0.90,2.70)   | 1.04 (-1.15,3.24)         | B. longum R0175    |                   |         |
| 0.69 (-0.83,2.21)   | 0.83 (-0.69,2.35)         | -0.21 (-2.11,1.68) | BAL+ST+LB         |         |
| 1.03 (-0.30,2.36)   | 1.17 (-0.16,2.50)         | 0.13 (-1.62,1.88)  | 0.34 (-0.39,1.07) | Placebo |

**Table S5. The surface under the cumulative ranking curve (SUCRA) values.****1. IBS-SSS**

| Treatment                  | SUCRA |
|----------------------------|-------|
| L. acidophilus DDS-1       | 92.9  |
| BL+LR                      | 91.6  |
| LC+LP+BAL                  | 90.9  |
| LP+LC+BL+ST+LA+X           | 85.2  |
| B. lactis UABla-12         | 75.8  |
| EF+LA+X                    | 66.2  |
| B. bifidum MIMBb75         | 62.6  |
| C. butyricum               | 54.2  |
| BAL+LA+BB+X                | 51.8  |
| L. acidophilus ATCC 700396 | 38.1  |
| L. plantarum 299v          | 38    |
| L. plantarum CCFM8610      | 31.4  |
| L. casei LCR35             | 31.3  |
| L. paracasei HA-196        | 31.1  |
| Placebo                    | 30.2  |
| B. longum R0175            | 10.5  |
| BAL+ST+LB                  | 10.1  |
| LR+PF+X                    | 8     |

**2. IBS-QOL**

| Treatment                  | SUCRA |
|----------------------------|-------|
| LP+LC+BL+ST+LA+X           | 100   |
| S. boulardii               | 70.7  |
| C. butyricum               | 64.2  |
| LC+LP+BAL                  | 55.3  |
| LA+LR+ST+BL+BBR+X          | 54    |
| EF+LA+X                    | 39.8  |
| BAL+ST+LB                  | 39.7  |
| LPA+LA+BAL                 | 30.7  |
| L. acidophilus ATCC 700396 | 26.1  |
| Placebo                    | 19.5  |

**3. HADS-total score**

| Treatment                  | SUCRA |
|----------------------------|-------|
| L. acidophilus ATCC 700396 | 78.3  |
| B. longum R0175            | 77.9  |
| Placebo                    | 26.9  |
| L. paracasei HA-196        | 17    |

**4. HADS-anxiety**

| Treatment                  | SUCRA |
|----------------------------|-------|
| B. longum NCC3001          | 93    |
| L. acidophilus ATCC 700396 | 59.5  |
| Placebo                    | 44    |
| LPA+LA+BAL                 | 3.4   |

**5. HADS-depression**

| Treatment                  | SUCRA |
|----------------------------|-------|
| B. longum NCC3001          | 99.1  |
| L. paracasei CNCM I-1572   | 57.3  |
| L. acidophilus ATCC 700396 | 45.2  |
| LPA+LA+BAL                 | 28.1  |
| Placebo                    | 20.2  |

**6. Abdominal pain score**

| Treatment                    | SUCRA |
|------------------------------|-------|
| B. coagulans MTCC 5856       | 96.9  |
| B. coagulans Unique IS2      | 92.6  |
| L. gasseri BNR17             | 91.3  |
| L. plantarum Apsulloc 331261 | 85.4  |
| L. acidophilus DDS-1         | 78.2  |
| LPA+LS+LP                    | 77.6  |
| BL+LR                        | 70.8  |
| S. cerevisiae CNCM I-3856    | 70.5  |
| VSL#3                        | 63    |
| L. acidophilus SDC 2012,2013 | 60    |
| EF+LA+X                      | 59.6  |
| B. lactis UABla-12           | 57.5  |
| BAL+LA+BB+X                  | 56.7  |
| LR+PF+X                      | 56.2  |
| LA+ST+X                      | 49.7  |
| LA+LR+ST+BL+BBR+X            | 47.4  |
| B. bifidum MIMBb75           | 45.6  |
| LP+LC+BL+ST+LA+X             | 45.2  |
| LP+LP+PA                     | 45    |
| LA+LA                        | 43    |
| C. butyricum CGMCC0313.1     | 42.1  |
| L. plantarum 299v            | 36.4  |
| L. acidophilus ATCC 700396   | 33.3  |
| L. casei LCR35               | 29.6  |
| BAL+ST+LB                    | 23.9  |
| LPA+LA+BAL                   | 22.9  |
| Placebo                      | 20.6  |
| BAL+LA+LR+X                  | 18.5  |
| S. boulardii CNCM I-475      | 13.8  |
| B. infantis 35624            | 9.7   |
| L. plantarum CCFM8610        | 6.9   |

## 7. Abdominal bloating score

| Treatment                    | SUCRA |
|------------------------------|-------|
| BL+LR                        | 94.5  |
| B. coagulans MTCC 5856       | 85    |
| L. plantarum CCFM8610        | 82.6  |
| L. plantarum Apsulloc 331261 | 80.3  |
| L. plantarum 299v            | 72    |
| VSL#3                        | 72    |
| B. bifidum MIMBb75           | 65.5  |
| L. acidophilus DDS-1         | 64.2  |
| LR+PF+X                      | 60.7  |
| LA+ST+X                      | 57.3  |
| S. cerevisiae CNCM I-3856    | 52.2  |
| B. coagulans Unique IS2      | 52.2  |
| BAL+LA+BB+X                  | 51.4  |
| B. lactis UABla-12           | 46.5  |
| LP+LC+BL+ST+LA+X             | 45.4  |
| EF+LA+X                      | 40.9  |
| LA+LR+ST+BL+BBR+X            | 35    |
| L. acidophilus ATCC 700396   | 29    |
| BAL+LA+LR+X                  | 28.5  |
| S. boulardii CNCM I-475      | 28.2  |
| C. butyricum CGMCC0313.1     | 28    |
| BAL+ST+LB                    | 26.4  |
| B. infantis 35624            | 21.7  |
| Placebo                      | 21.3  |
| LPA+LA+BAL                   | 9.2   |

## 8. Bowel movement frequency (per week) in IBS-D

| Treatment                    | SUCRA |
|------------------------------|-------|
| EF+LA+X                      | 89.7  |
| L. paracasei B21060          | 89.2  |
| L. paracasei HA-196          | 78.7  |
| B. coagulans GBI-306086      | 60.5  |
| L. plantarum Apsulloc 331261 | 58.7  |
| B. longum R0175              | 57.1  |
| LP+LC+BL+ST+LA+X             | 36.5  |
| C. butyricum                 | 32.5  |
| S. cerevisiae CNCM I-3856    | 24.7  |
| Placebo                      | 19.1  |
| S. boulardii                 | 3.3   |

**9. Bowel movement frequency (per week) in IBS-C**

| Treatment                 | SUCRA |
|---------------------------|-------|
| B. bifidum MIMBb75        | 67.3  |
| LA+ST+X                   | 56.5  |
| S. cerevisiae CNCM I-3856 | 53.7  |
| L. paracasei HA-196       | 53.6  |
| B. coagulans Unique IS2   | 53.1  |
| B. longum R0175           | 47.4  |
| BAL+ST+LB                 | 35.9  |

**10. Bristol stool form scale in IBS-D**

| Treatment                 | SUCRA |
|---------------------------|-------|
| B. coagulans MTCC 5856    | 99.6  |
| S. cerevisiae CNCM I-3856 | 89.7  |
| BL+LR                     | 75    |
| LA+LR+ST+BL+BBR+X         | 72.2  |
| LP+LP+PA                  | 65.1  |
| L. paracasei HA-196       | 46.6  |
| B. bifidum MIMBb75        | 44.9  |
| VSL#3                     | 43.8  |
| C. butyricum              | 37.5  |
| B. longum R0175           | 34.5  |
| Placebo                   | 27.2  |
| LP+LC+BL+ST+LA+X          | 9.5   |
| S. boulardii              | 4.5   |

**11. Bristol stool form scale in IBS-C**

| Treatment                 | SUCRA |
|---------------------------|-------|
| L. paracasei HA-196       | 75.4  |
| S. cerevisiae CNCM I-3856 | 80.1  |
| B. longum R0175           | 32.8  |
| BAL+ST+LB                 | 43.3  |
| Placebo                   | 18.4  |

**Table S6 Results of loop specific analysis, node-splitting method and design-by-treatment interaction inconsistency model.**

| Outcomes                          | loop specific analysis                                                       | node-splitting method | design-by-treatment             |
|-----------------------------------|------------------------------------------------------------------------------|-----------------------|---------------------------------|
|                                   |                                                                              |                       | interaction inconsistency model |
| IBS-SSS                           | NA (Loops were formed only by multi-arm trial(s) - Consistent by definition) | p>0.05 (all sides)    | NA*                             |
| IBS-QOL                           | NA (No loops found)                                                          | p>0.05 (all sides)    | NA*                             |
| HADS-total score                  | NA (Loops were formed only by multi-arm trial(s) - Consistent by definition) | p>0.05 (all sides)    | NA*                             |
| HADS-anxiety                      | NA (No loops found)                                                          | p>0.05 (all sides)    | NA*                             |
| HADS-depression                   | NA (No loops found)                                                          | p>0.05 (all sides)    | NA*                             |
| Abdominal pain score              | NA (Loops were formed only by multi-arm trial(s) - Consistent by definition) | p>0.05 (all sides)    | NA*                             |
| Abdominal bloating score          | NA (Loops were formed only by multi-arm trial(s) - Consistent by definition) | p>0.05 (all sides)    | NA*                             |
| Bowel movement frequency in IBS-D | NA (Loops were formed only by multi-arm trial(s) - Consistent by definition) | p>0.05 (all sides)    | NA*                             |
| Bowel movement frequency in IBS-C | NA (Loops were formed only by multi-arm trial(s) - Consistent by definition) | p>0.05 (all sides)    | NA*                             |
| Bristol stool form scale in IBS-D | NA (Loops were formed only by multi-arm trial(s) - Consistent by definition) | p>0.05 (all sides)    | NA*                             |
| Bristol stool form scale in IBS-C | NA (Loops were formed only by multi-arm trial(s) - Consistent by definition) | p>0.05 (all sides)    | NA*                             |
| Straining                         | NA (No loops found)                                                          | p>0.05 (all sides)    | NA*                             |
| Urgency                           | NA (No loops found)                                                          | p>0.05 (all sides)    | NA*                             |

\*The design-by-treatment interaction inconsistency model indicated that there is no source of inconsistency.

**Table S7. GRADE-based assessment of the quality of evidence for each outcome**

## 1. IBS-SSS

| Comparison(vs. placebo)    | Confidence | Downgrading due to            |
|----------------------------|------------|-------------------------------|
| L. acidophilus DDS-1       | Moderate   | Inconsistency                 |
| BL+LR                      | Moderate   | Study limitation              |
| LC+LP+BAL                  | Moderate   | Study limitation              |
| LP+LC+BL+ST+LA+X           | Moderate   | Inconsistency                 |
| B. lactis UABla-12         | Moderate   | Inconsistency                 |
| EF+LA+X                    | Moderate   | Study limitation              |
| B. bifidum MIMBb75         | High       | NA                            |
| C. butyricum               | High       | NA                            |
| BAL+LA+BB+X                | Moderate   | Study limitation              |
| L. acidophilus ATCC 700396 | Moderate   | Inconsistency                 |
| L. plantarum 299v          | Moderate   | Study limitation              |
| L. plantarum CCFM8610      | High       | NA                            |
| L. casei LCR35             | Low        | Study limitation; Imprecision |
| L. paracasei HA-196        | High       | NA                            |
| B. longum R0175            | High       | NA                            |
| BAL+ST+LB                  | Moderate   | Study limitation              |
| LR+PF+X                    | Low        | Study limitation; Imprecision |
| Ranking                    | Moderate   | Study limitation              |

## 2. IBS-QOL

| Comparison(vs. placebo)    | Confidence | Downgrading due to            |
|----------------------------|------------|-------------------------------|
| LP+LC+BL+ST+LA+X           | Moderate   | Study limitation              |
| S. boulardii               | Moderate   | Study limitation              |
| C. butyricum               | High       | NA                            |
| LC+LP+BAL                  | Moderate   | Study limitation              |
| LA+LR+ST+BL+BBR+X          | Moderate   | Study limitation              |
| EF+LA+X                    | Moderate   | Inconsistency                 |
| BAL+ST+LB                  | Moderate   | Study limitation              |
| LPA+LA+BAL                 | Low        | Study limitation; Imprecision |
| L. acidophilus ATCC 700396 | Moderate   | Study limitation              |
| Ranking                    | Moderate   | Study limitation              |

## 3. HADS-total score

| Comparison(vs. placebo)    | Confidence | Downgrading due to |
|----------------------------|------------|--------------------|
| L. acidophilus ATCC 700396 | Moderate   | Study limitation   |
| B. longum R0175            | High       | NA                 |
| L. paracasei HA-196        | High       | NA                 |
| Ranking                    | Moderate   | Study limitation   |

## 4. HADS-anxiety

| Comparison(vs. placebo)    | Confidence | Downgrading due to |
|----------------------------|------------|--------------------|
| B. longum NCC3001          | High       | NA                 |
| L. acidophilus ATCC 700396 | Moderate   | Study limitation   |
| LPA+LA+BAL                 | Moderate   | Study limitation   |
| Ranking                    | Moderate   | Study limitation   |

## 5. HADS-depression

| Comparison(vs. placebo)    | Confidence | Downgrading due to            |
|----------------------------|------------|-------------------------------|
| B. longum NCC3001          | High       | NA                            |
| L. paracasei CNCM I-1572   | High       | NA                            |
| L. acidophilus ATCC 700396 | Moderate   | Study limitation              |
| LPA+LA+BAL                 | Low        | Study limitation; Imprecision |
| Ranking                    | Low        | Study limitation              |

## 6. Abdominal pain score

| Comparison(vs. placebo)      | Confidence | Downgrading due to              |
|------------------------------|------------|---------------------------------|
| B. coagulans MTCC 5856       | Moderate   | Study limitation                |
| B. coagulans Unique IS2      | Moderate   | Study limitation                |
| L. gasseri BNR17             | Moderate   | Study limitation                |
| L. plantarum Apsulloc 331261 | Moderate   | Study limitation                |
| L. acidophilus DDS-1         | Moderate   | inconsistency                   |
| LPA+LS+LP                    | Low        | Study limitation; inconsistency |
| BL+LR                        | Low        | Study limitation; inconsistency |
| S. cerevisiae CNCM I-3856    | Moderate   | Study limitation                |
| VSL#3                        | Low        | Study limitation; inconsistency |
| L. acidophilus SDC 20122013  | Moderate   | inconsistency                   |
| EF+LA+X                      | Moderate   | Study limitation                |
| B. lactis UABla-12           | High       | NA                              |
| BAL+LA+BB+X                  | Low        | Study limitation; Imprecision   |
| LR+PF+X                      | Moderate   | Study limitation                |
| LA+ST+X                      | Moderate   | Study limitation                |
| LA+LR+ST+BL+BBR+X            | Moderate   | Study limitation                |
| B. bifidum MIMBb75           | Low        | Study limitation                |
| LP+LP+PA                     | Low        | Study limitation; inconsistency |
| LP+LC+BL+ST+LA+X             | Low        | Study limitation; inconsistency |
| LA+LA                        | Low        | Study limitation; inconsistency |
| C. butyricum                 | High       | NA                              |
| L. plantarum 299v            | Moderate   | Study limitation                |
| L. acidophilus ATCC 700396   | Moderate   | Inconsistency                   |
| L. casei LCR35               | Moderate   | Study limitation                |
| BAL+ST+LB                    | Low        | Study limitation; inconsistency |
| LPA+LA+BAL                   | Low        | Study limitation; inconsistency |
| BAL+LA+LR+X                  | Moderate   | Study limitation                |
| S. boulardii                 | Low        | Study limitation; Imprecision   |
| B. infantis 35624            | Low        | Study limitation                |
| L. plantarum CCFM8610        | Moderate   | Study limitation                |
| Ranking                      | Moderate   | Study limitation                |

## 7. Abdominal bloating score

| Comparison             | Confidence | Downgrading due to |
|------------------------|------------|--------------------|
| BL+LR                  | Moderate   | Study limitation   |
| B. coagulans MTCC 5856 | Moderate   | Study limitation   |

|                              |          |                               |
|------------------------------|----------|-------------------------------|
| L. plantarum CCFM8610        | Moderate | Study limitation              |
| L. plantarum Apsulloc 331261 | Moderate | Study limitation              |
| VSL#3                        | Low      | Study limitation              |
| L. plantarum 299v            | Moderate | Study limitation              |
| B. bifidum MIMBb75           | Moderate | Study limitation              |
| L. acidophilus DDS-1         | High     | NA                            |
| LR+PF+X                      | Moderate | Study limitation              |
| LA+ST+X                      | Moderate | Study limitation              |
| B. coagulans Unique IS2      | Moderate | Study limitation              |
| S. cerevisiae CNCM I-3856    | Moderate | Study limitation              |
| BAL+LA+BB+X                  | Moderate | Study limitation              |
| B. lactis UABla-12           | High     | NA                            |
| LP+LC+BL+ST+LA+X             | Low      | Study limitation              |
| EF+LA+X                      | Low      | Study limitation; Imprecision |
| LA+LR+ST+BL+BBR+X            | Moderate | Study limitation              |
| L. acidophilus ATCC 700396   | High     | NA                            |
| BAL+LA+LR+X                  | Moderate | Study limitation              |
| S. boulardii                 | Low      | Study limitation; Imprecision |
| C. butyricum                 | Moderate | Study limitation              |
| BAL+ST+LB                    | Moderate | Study limitation              |
| B. infantis 35624            | Low      | Study limitation; Imprecision |
| LPA+LA+BAL                   | Moderate | Study limitation              |
| Ranking                      | Moderate | Study limitation              |

## 8. Bowel movement frequency (per week) in IBS-D

| Comparison                   | Confidence | Downgrading due to            |
|------------------------------|------------|-------------------------------|
| EF+LA+X                      | Moderate   | Study limitation              |
| L. paracasei B21060          | High       | NA                            |
| L. paracasei HA-196          | High       | NA                            |
| B. coagulans GBI-306086      | Moderate   | Study limitation              |
| L. plantarum Apsulloc 331261 | Moderate   | Study limitation              |
| B. longum R0175              | High       | NA                            |
| LP+LC+BL+ST+LA+X             | Moderate   | Study limitation              |
| C. butyricum                 | Low        | Study limitation; Imprecision |
| S. cerevisiae CNCM I-3856    | High       | NA                            |
| S. boulardii                 | Low        | Study limitation; Imprecision |
| Ranking                      | Moderate   | Study limitation              |

## 9. Bowel movement frequency (per week) in IBS-C

| Comparison                | Confidence | Downgrading due to            |
|---------------------------|------------|-------------------------------|
| B. bifidum MIMBb75        | High       | NA                            |
| LA+ST+X                   | Moderate   | Study limitation              |
| S. cerevisiae CNCM I-3856 | High       | NA                            |
| L. paracasei HA-196       | High       | NA                            |
| B. coagulans Unique IS2   | Moderate   | Study limitation              |
| B. longum R0175           | High       | NA                            |
| BAL+ST+LB                 | Low        | Study limitation; Imprecision |
| Ranking                   | Low        | Study limitation              |

## 10. Bristol stool form scale in IBS-D

| Comparison                | Confidence | Downgrading due to              |
|---------------------------|------------|---------------------------------|
| B. coagulans MTCC 5856    | Low        | Inconsistency                   |
| S. cerevisiae CNCM I-3856 | Low        | study limitation; inconsistency |
| BL+LR                     | Low        | study limitation; inconsistency |
| LA+LR+ST+BL+BBR+X         | Moderate   | study limitation                |
| LP+LP+PA                  | Low        | study limitation; inconsistency |
| L. paracasei HA-196       | High       | NA                              |
| B. bifidum MIMBb75        | High       | NA                              |
| VSL#3                     | Moderate   | study limitation                |
| C. butyricum              | High       | NA                              |
| B. longum R0175           | High       | NA                              |
| LP+LC+BL+ST+LA+X          | Moderate   | study limitation                |
| S. boulardii              | Moderate   | study limitation                |
| Ranking                   | Moderate   | Study limitation                |

## 11. Bristol stool form scale in IBS-C

| Comparison                | Confidence | Downgrading due to            |
|---------------------------|------------|-------------------------------|
| L. paracasei HA-196       | High       | NA                            |
| S. cerevisiae CNCM I-3856 | Moderate   | Study limitation              |
| B. longum R0175           | High       | NA                            |
| BAL+ST+LB                 | Low        | Study limitation; Imprecision |
| Ranking                   | High       | NA                            |

**Table S8. Alterations of gut microbiota abundance.**

| Study             | Probiotic used                                                                                                                                                  | Alterations of gut microbiota in probiotic groups                                                                                                                                                                                            |
|-------------------|-----------------------------------------------------------------------------------------------------------------------------------------------------------------|----------------------------------------------------------------------------------------------------------------------------------------------------------------------------------------------------------------------------------------------|
| Bai, 2023         | B. infantis, L. acidophilus, E. faecalis, and B. cereus                                                                                                         | ↑Butyricimonas, Pseudobutyrvibrio, Barnesiella, and Sutterella                                                                                                                                                                               |
| Jung, 2022        | L. plantarum                                                                                                                                                    | ↑Firmicutes, Lactobacillus<br>↓Bacteroides                                                                                                                                                                                                   |
| Xu, 2021          | L. casei, B. animalis subsp. lactis, and L. plantarum                                                                                                           | ↑Prevotella (days 28)<br>↓Prevotella (days 7), Citrobacter, Clostridium, Escherichia                                                                                                                                                         |
| Liu, 2021         | L. plantarum                                                                                                                                                    | ↑Bifidobacterium, Bacteroides, Ruminococcus, Parabacteroides,<br>↑Butyric acid-producing genera: Anaerostipes, Anaerotruncus,<br>Bifidobacterium, Butyricimonas, and Odoribacter<br>↓Prevotella, Methanobrevibacter (bloating-related genus) |
| Lewis, 2020       | L. paracasei and B. longum                                                                                                                                      | → L. paracasei, B. longum or Bifidobacterium                                                                                                                                                                                                 |
| Sun, 2018         | C. butyricum                                                                                                                                                    | ↓Clostridium sensu stricto                                                                                                                                                                                                                   |
| Shin, 2018        | L. gasseri                                                                                                                                                      | ↑Actinobacteria, Lactobacillus, Bifidobacterium<br>↓Proteobacteria, Blautia, fecalibacterium                                                                                                                                                 |
| Cremon, 2018      | L. paracasei                                                                                                                                                    | ↑Lactobacillus, Oscillospira, Parabacteroides, and an unidentified<br>member of the family Barnesiaceae<br>↓Ruminococcus                                                                                                                     |
| Nobutani, 2017    | L. gasseri                                                                                                                                                      | ↓Dorea, Enterococcus and Dialister                                                                                                                                                                                                           |
| Hod, 2017         | L. rhamnosus, L. casei, L. paracasei, L. plantarum, L. acidophilus, B. bifidum B. longum, B. breve, B. infantis, S. thermophilus, L. bulgaricus, and L. lactis. | ↑Bifidobacterium, Lactobacillus and Streptococcus genera                                                                                                                                                                                     |
| Mezzasalma, 2016  | L. acidophilus, L. reuteri, L. plantarum, L. rhamnosus, B. animalis subsp. Lactis                                                                               | ↑L. acidophilus<br>↓B. animalis subsp. lactis                                                                                                                                                                                                |
| Yoon, 2015        | B. bifidum, B. lactis, B. longum, L. acidophilus, L. rhamnosus, and S. thermophilus                                                                             | ↑B. bifidum, B. lactis, L. acidophilus, L. rhamnosus<br>→ Bacteroidetes and Firmicutes                                                                                                                                                       |
| Yoon, 2014        | B. bifidum, B. lactis, B. longum, L. acidophilus, L. rhamnosus, and S. thermophilus                                                                             | ↑B. lactis, L. rhamnosus and S. thermophilus<br>→ B. longum, B. bifidum, L. acidophilus, and Escherichia coli subgroup, and Clostridium perfringens and Bacteroides group.                                                                   |
| Lee, 2013         | L. rhamnosus, B. animalis subsp. lactis, L. casei, L. acidophilus and L. fermentum                                                                              | ↓Clostridium                                                                                                                                                                                                                                 |
| Charbonneau, 2013 | B. infantis                                                                                                                                                     | ↑B. infantis, Clostridium coccoides-Eubacterium rectale group                                                                                                                                                                                |
| Cui, 2012         | B. longum and L. acidophilus                                                                                                                                    | ↑Bifidobacterium and Lactobacillus                                                                                                                                                                                                           |
| Michail, 2011     | B. longum, B. infantis, B. breve, L. acidophilus, L. casei, L. delbrueckii ssp. bulgaricus, L. plantarum, and S. salivarius ssp. thermophilus.                  | → No differences noted at the Phylum, Class, Order, Family, or Genus levels.                                                                                                                                                                 |

↑: bacteria with increased abundance; ↓: bacteria with decreased abundance; →: bacteria with no significant change.

**Table S9. The alteration of gut microbiota diversity before and after intervention**

| Study               | Probiotic used                                                                         | $\alpha$ diversity                                                                                                                                                                                                                                   | $\beta$ diversity                                                                                                                                                  |
|---------------------|----------------------------------------------------------------------------------------|------------------------------------------------------------------------------------------------------------------------------------------------------------------------------------------------------------------------------------------------------|--------------------------------------------------------------------------------------------------------------------------------------------------------------------|
| Bai, 2023           | <i>B. infantis</i> , <i>L. acidophilus</i> , <i>E. faecalis</i> , and <i>B. cereus</i> | 1. No significant changes in $\alpha$ diversity (Chao1, ACE, Shannon, and Simpson)                                                                                                                                                                   | 1. No significant changes in $\beta$ diversity (measured by Bray Curtis and unweighted UniFrac distance)                                                           |
| Xu, 2021            | <i>L. casei</i> , <i>B. animalis</i> subsp. <i>Lactis</i> , and <i>L. plantarum</i>    | 1. no significant difference was observed in the Shannon index between the control and probiotic groups at the end of the trial<br>2. the Shannon index increased in the probiotic group (days 7), followed by a slight decline afterwards (days 28) | 1. obvious clustering pattern was seen on the PCoA score plots at day 7 and day 28 between two groups.                                                             |
| Liu, 2021           | <i>L. plantarum</i>                                                                    | 1. The Simpson index and Shannon index of patients in the <i>L. plantarum</i> CCFM8610 group were significantly higher than those in the placebo group                                                                                               | 1. supplementation with probiotics could change the composition of the gut microbiota (PCA)                                                                        |
| Sun, 2018           | <i>C. butyricum</i>                                                                    | 1. No significant differences were found between baseline and week 4 levels with Chao, Sobs and Shannon index<br>2. Sobs index showed an increased tendency after treating with CB                                                                   | 1. a significant difference was found at week 4 between two groups (PcoA analysis)                                                                                 |
| Cremon, 2018        | <i>L. paracasei</i>                                                                    | 1. The differences between LCDG and placebo in modulating $\alpha$ diversity were not significant (Chao1, Shannon, and InvSimpson indexes)                                                                                                           | 1. The differences between LCDG and placebo in modulating $\beta$ diversity were not significant (PCoA)                                                            |
| Pinto-Sanchez, 2017 | <i>B. longum</i>                                                                       | 1. There were no major differences in alpha diversity (Shannon, Chao1, and Observed Species indices) before or after the treatment between the 2 groups.                                                                                             | 1. There were no major differences in taxa, compositional distance (Bray-Curtis Principal Coordinate analysis) before or after the treatment between the 2 groups. |
